# Supplementary material
Source: PubMed Central journal article supplement (PMC3470480)
Supplement: NIHMS397435-supplement-Supplemental_Table_1.pdf [file NIHMS397435-supplement-Supplemental_Table_1.pdf]

**Supplementary Table 1: Protein identifications from microdialysates.**

Details of the LC-MS/MS analysis and data processing are described in **Online Methods**. The table shows protein identifications across all microdialysate samples. Score is the aggregated MASCOT score of all peptides below the significance threshold of  $p < 0.05$ . Protein names are stated as UniProt identifiers<sup>1</sup>.

| Rank | UniProt     | Description                                                                  | # of peptides | Score |
|------|-------------|------------------------------------------------------------------------------|---------------|-------|
| 1    | CO3_HUMAN   | Complement C3 OS=Homo sapiens GN=C3 PE=1 SV=2                                | 62            | 3717  |
| 2    | ALBU_HUMAN  | Serum albumin OS=Homo sapiens GN=ALB PE=1 SV=2                               | 48            | 3191  |
| 3    | TRFE_HUMAN  | Serotransferrin OS=Homo sapiens GN=TF PE=1 SV=2                              | 43            | 3135  |
| 4    | A2MG_HUMAN  | Alpha-2-macroglobulin OS=Homo sapiens GN=A2M PE=1 SV=1                       | 43            | 2641  |
| 5    | AMY1_HUMAN  | Alpha-amylase 1 OS=Homo sapiens GN=AMY1A PE=1 SV=2                           | 33            | 2230  |
| 6    | AMY2B_HUMAN | Alpha-amylase 2B OS=Homo sapiens GN=AMY2B PE=1 SV=1                          | 30            | 1987  |
| 7    | K2C1_HUMAN  | Keratin, type II cytoskeletal 1 OS=Homo sapiens GN=KRT1 PE=1 SV=5            | 29            | 1974  |
| 8    | AMYP_HUMAN  | Pancreatic alpha-amylase OS=Homo sapiens GN=AMY2A PE=1 SV=2                  | 27            | 1825  |
| 9    | A1AT_HUMAN  | Alpha-1-antitrypsin OS=Homo sapiens GN=SERPINA1 PE=1 SV=3                    | 29            | 1788  |
| 10   | K1C10_HUMAN | Keratin, type I cytoskeletal 10 OS=Homo sapiens GN=KRT10 PE=1 SV=4           | 23            | 1518  |
| 11   | HPT_HUMAN   | Haptoglobin OS=Homo sapiens GN=HP PE=1 SV=1                                  | 22            | 1316  |
| 12   | K22E_HUMAN  | Keratin, type II cytoskeletal 2 epidermal OS=Homo sapiens GN=KRT2 PE=1 SV=1  | 19            | 1242  |
| 13   | APOA1_HUMAN | Apolipoprotein A-I OS=Homo sapiens GN=APOA1 PE=1 SV=1                        | 18            | 1124  |
| 14   | FIBA_HUMAN  | Fibrinogen alpha chain OS=Homo sapiens GN=FGA PE=1 SV=2                      | 18            | 1113  |
| 15   | CO4A_HUMAN  | Complement C4-A OS=Homo sapiens GN=C4A PE=1 SV=1                             | 17            | 1008  |
| 16   | CO4B_HUMAN  | Complement C4-B OS=Homo sapiens GN=C4B PE=1 SV=1                             | 17            | 1008  |
| 17   | K1C9_HUMAN  | Keratin, type I cytoskeletal 9 OS=Homo sapiens GN=KRT9 PE=1 SV=2             | 15            | 1000  |
| 18   | NGAL_HUMAN  | Neutrophil gelatinase-associated lipocalin OS=Homo sapiens GN=LCN2 PE=1 SV=2 | 16            | 934   |
| 19   | HBB_HUMAN   | Hemoglobin subunit beta OS=Homo sapiens GN=HBB PE=1 SV=2                     | 14            | 895   |
| 20   | CAH1_HUMAN  | Carbonic anhydrase 1 OS=Homo sapiens GN=CA1 PE=1 SV=2                        | 11            | 889   |
| 21   | IGHG2_HUMAN | Ig gamma-2 chain C region OS=Homo sapiens GN=IGHG2 PE=1 SV=2                 | 15            | 887   |
| 22   | CERU_HUMAN  | Ceruloplasmin OS=Homo sapiens GN=CP PE=1 SV=1                                | 13            | 843   |
| 23   | IGHG1_HUMAN | Ig gamma-1 chain C region OS=Homo sapiens GN=IGHG1 PE=1 SV=1                 | 12            | 790   |
| 24   | HPTR_HUMAN  | Haptoglobin-related protein OS=Homo sapiens GN=HPR PE=2 SV=1                 | 13            | 754   |
| 25   | HBD_HUMAN   | Hemoglobin subunit delta OS=Homo sapiens GN=HBD PE=1 SV=2                    | 12            | 753   |
| 26   | IGHG3_HUMAN | Ig gamma-3 chain C region OS=Homo sapiens GN=IGHG3 PE=1 SV=2                 | 12            | 734   |
| 27   | PROF1_HUMAN | Profilin-1 OS=Homo sapiens GN=PFN1 PE=1 SV=2                                 | 10            | 721   |
| 28   | CFAB_HUMAN  | Complement factor B OS=Homo sapiens GN=CFB PE=1 SV=2                         | 11            | 711   |
| 29   | HEMO_HUMAN  | Hemopexin OS=Homo sapiens GN=HPX PE=1 SV=2                                   | 14            | 675   |
| 30   | K2C6A_HUMAN | Keratin, type II cytoskeletal 6A OS=Homo sapiens GN=KRT6A PE=1 SV=3          | 12            | 672   |
| 31   | K2C6C_HUMAN | Keratin, type II cytoskeletal 6C OS=Homo sapiens GN=KRT6C PE=1 SV=3          | 12            | 672   |
| 32   | PPIA_HUMAN  | Peptidyl-prolyl cis-trans isomerase A OS=Homo sapiens GN=PPIA PE=1 SV=2      | 9             | 670   |
| 33   | K1C14_HUMAN | Keratin, type I cytoskeletal 14 OS=Homo sapiens GN=KRT14 PE=1 SV=3           | 12            | 656   |
| 34   | K2C6B_HUMAN | Keratin, type II cytoskeletal 6B OS=Homo sapiens GN=KRT6B PE=1 SV=4          | 11            | 622   |
| 35   | MYG_HUMAN   | Myoglobin OS=Homo sapiens GN=MB PE=1 SV=2                                    | 8             | 590   |
| 36   | K2C5_HUMAN  | Keratin, type II cytoskeletal 5 OS=Homo sapiens GN=KRT5 PE=1 SV=3            | 11            | 567   |
| 37   | ZA2G_HUMAN  | Zinc-alpha-2-glycoprotein OS=Homo sapiens GN=AZGP1 PE=1 SV=1                 | 9             | 519   |
| 38   | K1C16_HUMAN | Keratin, type I cytoskeletal 16 OS=Homo sapiens GN=KRT16 PE=1 SV=4           | 11            | 518   |
| 39   | IGHG4_HUMAN | Ig gamma-4 chain C region OS=Homo sapiens GN=IGHG4 PE=1 SV=1                 | 8             | 513   |
| 40   | LYSC_HUMAN  | Lysozyme C OS=Homo sapiens GN=LYZ PE=1 SV=1                                  | 8             | 512   |
| 41   | AACT_HUMAN  | Alpha-1-antichymotrypsin OS=Homo sapiens GN=SERPINA3 PE=1 SV=2               | 7             | 500   |
| 42   | CFAH_HUMAN  | Complement factor H OS=Homo sapiens GN=CFH PE=1 SV=4                         | 9             | 470   |
| 43   | KV105_HUMAN | Ig kappa chain V-I region DEE OS=Homo sapiens PE=1 SV=1                      | 6             | 464   |
| 44   | ANGT_HUMAN  | Angiotensinogen OS=Homo sapiens GN=AGT PE=1 SV=1                             | 7             | 457   |
| 45   | HV306_HUMAN |                                                                              | 8             | 449   |
| 46   | MMP9_HUMAN  | Matrix metalloproteinase-9 OS=Homo sapiens GN=MMP9 PE=1 SV=2                 | 8             | 438   |
| 47   | IC1_HUMAN   | Plasma protease C1 inhibitor OS=Homo sapiens GN=SERPING1 PE=1 SV=2           | 7             | 433   |
| 48   | IGKC_HUMAN  | Ig kappa chain C region OS=Homo sapiens GN=IGKC PE=1 SV=1                    | 5             | 429   |

|     |             |                                                                                 |   |     |
|-----|-------------|---------------------------------------------------------------------------------|---|-----|
| 49  | PZP_HUMAN   | Pregnancy zone protein OS=Homo sapiens GN=PZP PE=1 SV=3                         | 6 | 426 |
| 50  | K1C17_HUMAN | Keratin, type I cytoskeletal 17 OS=Homo sapiens GN=KRT17 PE=1 SV=2              | 8 | 425 |
| 51  | CHIT1_HUMAN | Chitotriosidase-1 OS=Homo sapiens GN=CHIT1 PE=1 SV=1                            | 7 | 424 |
| 52  | ANT3_HUMAN  | Antithrombin-III OS=Homo sapiens GN=SERPINC1 PE=1 SV=1                          | 7 | 418 |
| 53  | ITIH1_HUMAN | Inter-alpha-trypsin inhibitor heavy chain H1 OS=Homo sapiens GN=ITIH1 PE=1 SV=3 | 6 | 416 |
| 54  | FIBB_HUMAN  | Fibrinogen beta chain OS=Homo sapiens GN=FGB PE=1 SV=2                          | 6 | 414 |
| 55  | TPIS_HUMAN  | Triosephosphate isomerase OS=Homo sapiens GN=TPI1 PE=1 SV=2                     | 5 | 404 |
| 56  | IGHA1_HUMAN | Ig alpha-1 chain C region OS=Homo sapiens GN=IGHA1 PE=1 SV=2                    | 5 | 389 |
| 57  | HV307_HUMAN |                                                                                 | 6 | 371 |
| 58  | GELS_HUMAN  | Gelsolin OS=Homo sapiens GN=GSN PE=1 SV=1                                       | 5 | 370 |
| 59  | FIBG_HUMAN  | Fibrinogen gamma chain OS=Homo sapiens GN=FGG PE=1 SV=3                         | 7 | 363 |
| 60  | A1AG1_HUMAN | Alpha-1-acid glycoprotein 1 OS=Homo sapiens GN=ORM1 PE=1 SV=1                   | 6 | 362 |
| 61  | HBA_HUMAN   | Hemoglobin subunit alpha OS=Homo sapiens GN=HBA1 PE=1 SV=2                      | 6 | 356 |
| 62  | CAH2_HUMAN  | Carbonic anhydrase 2 OS=Homo sapiens GN=CA2 PE=1 SV=2                           | 6 | 355 |
| 63  | A1BG_HUMAN  | Alpha-1B-glycoprotein OS=Homo sapiens GN=A1BG PE=1 SV=3                         | 5 | 340 |
| 64  | ITIH2_HUMAN | Inter-alpha-trypsin inhibitor heavy chain H2 OS=Homo sapiens GN=ITIH2 PE=1 SV=1 | 6 | 329 |
| 65  | KV301_HUMAN | Ig kappa chain V-III region B6 OS=Homo sapiens PE=1 SV=1                        | 3 | 328 |
| 66  | HV303_HUMAN | Ig heavy chain V-III region VH26 OS=Homo sapiens PE=1 SV=1                      | 5 | 323 |
| 67  | OLFM4_HUMAN | Olfactomedin-4 OS=Homo sapiens GN=OLFM4 PE=1 SV=1                               | 4 | 310 |
| 68  | KV302_HUMAN | Ig kappa chain V-III region SIE OS=Homo sapiens PE=1 SV=1                       | 3 | 305 |
| 69  | KV305_HUMAN | Ig kappa chain V-III region WOL OS=Homo sapiens PE=1 SV=1                       | 3 | 305 |
| 70  | ITIH4_HUMAN | Inter-alpha-trypsin inhibitor heavy chain H4 OS=Homo sapiens GN=ITIH4 PE=1 SV=3 | 5 | 302 |
| 71  | K1C15_HUMAN | Keratin, type I cytoskeletal 15 OS=Homo sapiens GN=KRT15 PE=1 SV=2              | 5 | 299 |
| 72  | KV101_HUMAN | Ig kappa chain V-I region AG OS=Homo sapiens PE=1 SV=1                          | 4 | 297 |
| 73  | KV106_HUMAN | Ig kappa chain V-I region EU OS=Homo sapiens PE=1 SV=1                          | 4 | 297 |
| 74  | VTDB_HUMAN  | Vitamin D-binding protein OS=Homo sapiens GN=GC PE=1 SV=1                       | 7 | 297 |
| 75  | LAC_HUMAN   | Ig lambda chain C regions OS=Homo sapiens GN=IGLC1 PE=1 SV=1                    | 3 | 293 |
| 76  | HV305_HUMAN | Ig heavy chain V-III region BRO OS=Homo sapiens PE=1 SV=1                       | 4 | 290 |
| 77  | HV320_HUMAN | Ig heavy chain V-III region GAL OS=Homo sapiens PE=1 SV=1                       | 5 | 282 |
| 78  | KV114_HUMAN | Ig kappa chain V-I region OU OS=Homo sapiens PE=1 SV=1                          | 4 | 280 |
| 79  | CH3L1_HUMAN | Chitinase-3-like protein 1 OS=Homo sapiens GN=CHI3L1 PE=1 SV=2                  | 6 | 278 |
| 80  | TTHY_HUMAN  | Transthyretin OS=Homo sapiens GN=TTR PE=1 SV=1                                  | 3 | 267 |
| 81  | ACTN1_HUMAN | Alpha-actinin-1 OS=Homo sapiens GN=ACTN1 PE=1 SV=2                              | 4 | 265 |
| 82  | ACTN4_HUMAN | Alpha-actinin-4 OS=Homo sapiens GN=ACTN4 PE=1 SV=2                              | 4 | 265 |
| 83  | CYTA_HUMAN  | Cystatin-A OS=Homo sapiens GN=CSTA PE=1 SV=1                                    | 3 | 265 |
| 84  | K1C13_HUMAN | Keratin, type I cytoskeletal 13 OS=Homo sapiens GN=KRT13 PE=1 SV=3              | 5 | 258 |
| 85  | FINC_HUMAN  | Fibronectin OS=Homo sapiens GN=FN1 PE=1 SV=3                                    | 4 | 256 |
| 86  | S10A8_HUMAN | Protein S100-A8 OS=Homo sapiens GN=S100A8 PE=1 SV=1                             | 5 | 255 |
| 87  | K2C75_HUMAN | Keratin, type II cytoskeletal 75 OS=Homo sapiens GN=KRT75 PE=1 SV=1             | 4 | 254 |
| 88  | KV402_HUMAN | Ig kappa chain V-IV region Len OS=Homo sapiens PE=1 SV=2                        | 3 | 251 |
| 89  | KV102_HUMAN | Ig kappa chain V-I region AU OS=Homo sapiens PE=1 SV=1                          | 3 | 250 |
| 90  | KV107_HUMAN | Ig kappa chain V-I region Gal OS=Homo sapiens PE=1 SV=1                         | 3 | 250 |
| 91  | KV108_HUMAN | Ig kappa chain V-I region Hau OS=Homo sapiens PE=1 SV=1                         | 3 | 250 |
| 92  | KV115_HUMAN | Ig kappa chain V-I region Rei OS=Homo sapiens PE=1 SV=1                         | 3 | 250 |
| 93  | KV116_HUMAN | Ig kappa chain V-I region Roy OS=Homo sapiens PE=1 SV=1                         | 3 | 250 |
| 94  | KV117_HUMAN | Ig kappa chain V-I region Scw OS=Homo sapiens PE=1 SV=1                         | 3 | 250 |
| 95  | KV118_HUMAN | Ig kappa chain V-I region WEA OS=Homo sapiens PE=1 SV=1                         | 3 | 250 |
| 96  | KV125_HUMAN | Ig kappa chain V-I region WAT OS=Homo sapiens PE=1 SV=1                         | 3 | 250 |
| 97  | HRG_HUMAN   | Histidine-rich glycoprotein OS=Homo sapiens GN=HRG PE=1 SV=1                    | 4 | 247 |
| 98  | IGHA2_HUMAN | Ig alpha-2 chain C region OS=Homo sapiens GN=IGHA2 PE=1 SV=3                    | 3 | 247 |
| 99  | ACTB_HUMAN  | Actin, cytoplasmic 1 OS=Homo sapiens GN=ACTB PE=1 SV=1                          | 4 | 243 |
| 100 | ACTG_HUMAN  | Actin, cytoplasmic 2 OS=Homo sapiens GN=ACTG1 PE=1 SV=1                         | 4 | 243 |
| 101 | DCD_HUMAN   | Dermcidin OS=Homo sapiens GN=DCD PE=1 SV=2                                      | 4 | 243 |
| 102 | LDHA_HUMAN  | L-lactate dehydrogenase A chain OS=Homo sapiens GN=LDHA PE=1 SV=2               | 3 | 238 |
| 103 | KV104_HUMAN | Ig kappa chain V-I region CAR OS=Homo sapiens PE=1 SV=1                         | 3 | 236 |
| 104 | KV304_HUMAN | Ig kappa chain V-III region Ti OS=Homo sapiens PE=1 SV=1                        | 2 | 236 |
| 105 | KV307_HUMAN | Ig kappa chain V-III region GOL OS=Homo sapiens PE=1 SV=1                       | 2 | 236 |
| 106 | AMBP_HUMAN  | Protein AMBP OS=Homo sapiens GN=AMBP PE=1 SV=1                                  | 3 | 225 |
| 107 | HV304_HUMAN | Ig heavy chain V-III region TIL OS=Homo sapiens PE=1 SV=1                       | 3 | 222 |

|     |             |                                                                                   |   |     |
|-----|-------------|-----------------------------------------------------------------------------------|---|-----|
| 108 | A1AG2_HUMAN | Alpha-1-acid glycoprotein 2 OS=Homo sapiens GN=ORM2 PE=1 SV=2                     | 4 | 216 |
| 109 | COF1_HUMAN  | Cofilin-1 OS=Homo sapiens GN=CFL1 PE=1 SV=3                                       | 4 | 212 |
| 110 | APOH_HUMAN  | Beta-2-glycoprotein 1 OS=Homo sapiens GN=APOH PE=1 SV=3                           | 4 | 211 |
| 111 | A2GL_HUMAN  | Leucine-rich alpha-2-glycoprotein OS=Homo sapiens GN=LRG1 PE=1 SV=2               | 4 | 202 |
| 112 | G6PI_HUMAN  | Glucose-6-phosphate isomerase OS=Homo sapiens GN=GPI PE=1 SV=4                    | 3 | 196 |
| 113 | CYTT_HUMAN  | Cystatin-SA OS=Homo sapiens GN=CST2 PE=1 SV=1                                     | 4 | 195 |
| 114 | TRFL_HUMAN  | Lactotransferrin OS=Homo sapiens GN=LTF PE=1 SV=6                                 | 4 | 190 |
| 115 | B2MG_HUMAN  | Beta-2-microglobulin OS=Homo sapiens GN=B2M PE=1 SV=1                             | 3 | 188 |
| 116 | CYTN_HUMAN  | Cystatin-SN OS=Homo sapiens GN=CST1 PE=1 SV=2                                     | 3 | 188 |
| 117 | KV312_HUMAN | Ig kappa chain V-III region HAH OS=Homo sapiens PE=4 SV=1                         | 2 | 184 |
| 118 | KV313_HUMAN | Ig kappa chain V-III region HIC OS=Homo sapiens PE=4 SV=1                         | 2 | 184 |
| 119 | RET4_HUMAN  | Retinol-binding protein 4 OS=Homo sapiens GN=RBP4 PE=1 SV=3                       | 4 | 181 |
| 120 | 1433Z_HUMAN | 14-3-3 protein zeta/delta OS=Homo sapiens GN=YWHAZ PE=1 SV=1                      | 3 | 178 |
| 121 | K2C79_HUMAN | Keratin, type II cytoskeletal 79 OS=Homo sapiens GN=KRT79 PE=1 SV=1               | 3 | 177 |
| 122 | KV203_HUMAN | Ig kappa chain V-II region MIL OS=Homo sapiens PE=1 SV=1                          | 2 | 176 |
| 123 | UBIQ_HUMAN  | Ubiquitin OS=Homo sapiens GN=RPS27A PE=1 SV=1                                     | 3 | 176 |
| 124 | PEDF_HUMAN  | Pigment epithelium-derived factor OS=Homo sapiens GN=SERPINF1 PE=1 SV=3           | 3 | 175 |
| 125 | S10A9_HUMAN | Protein S100-A9 OS=Homo sapiens GN=S100A9 PE=1 SV=1                               | 3 | 175 |
| 126 | CYTS_HUMAN  | Cystatin-S OS=Homo sapiens GN=CST4 PE=1 SV=3                                      | 4 | 174 |
| 127 | K1C19_HUMAN | Keratin, type I cytoskeletal 19 OS=Homo sapiens GN=KRT19 PE=1 SV=3                | 3 | 173 |
| 128 | KV119_HUMAN | Ig kappa chain V-I region Wes OS=Homo sapiens PE=1 SV=1                           | 2 | 170 |
| 129 | A26CA_HUMAN | ANKRD26-like family C member 1A OS=Homo sapiens GN=A26C1A PE=1 SV=3               | 3 | 168 |
| 130 | A26CB_HUMAN | ANKRD26-like family C member 1B OS=Homo sapiens GN=A26C1B PE=1 SV=2               | 3 | 168 |
| 131 | HV308_HUMAN | Ig heavy chain V-III region GA OS=Homo sapiens PE=1 SV=1                          | 3 | 168 |
| 132 | APOA2_HUMAN | Apolipoprotein A-II OS=Homo sapiens GN=APOA2 PE=1 SV=1                            | 3 | 166 |
| 133 | GRP78_HUMAN | 78 kDa glucose-regulated protein OS=Homo sapiens GN=HSPA5 PE=1 SV=2               | 4 | 160 |
| 134 | K2C73_HUMAN | Keratin, type II cytoskeletal 73 OS=Homo sapiens GN=KRT73 PE=1 SV=1               | 3 | 153 |
| 135 | K2C74_HUMAN | Keratin, type II cytoskeletal 74 OS=Homo sapiens GN=KRT74 PE=1 SV=2               | 3 | 153 |
| 136 | PPIB_HUMAN  | Peptidyl-prolyl cis-trans isomerase B OS=Homo sapiens GN=PPIB PE=1 SV=2           | 2 | 153 |
| 137 | THIO_HUMAN  | Thioredoxin OS=Homo sapiens GN=TXN PE=1 SV=3                                      | 2 | 152 |
| 138 | LMNA_HUMAN  | Lamin A/C OS=Homo sapiens GN=LMNA PE=1 SV=1                                       | 2 | 148 |
| 139 | ACTN2_HUMAN | Alpha-actinin-2 OS=Homo sapiens GN=ACTN2 PE=1 SV=1                                | 2 | 145 |
| 140 | ACTN3_HUMAN | Alpha-actinin-3 OS=Homo sapiens GN=ACTN3 PE=1 SV=2                                | 2 | 145 |
| 141 | HBG1_HUMAN  | Hemoglobin subunit gamma-1 OS=Homo sapiens GN=HBG1 PE=1 SV=2                      | 2 | 145 |
| 142 | HBG2_HUMAN  | Hemoglobin subunit gamma-2 OS=Homo sapiens GN=HBG2 PE=1 SV=2                      | 2 | 145 |
| 143 | KV121_HUMAN | Ig kappa chain V-I region Ni OS=Homo sapiens PE=1 SV=1                            | 3 | 145 |
| 144 | LDH6B_HUMAN | L-lactate dehydrogenase A-like 6B OS=Homo sapiens GN=LDHAL6B PE=1 SV=3            | 1 | 145 |
| 145 | LV302_HUMAN | Ig lambda chain V-III region LOI OS=Homo sapiens PE=1 SV=1                        | 2 | 143 |
| 146 | PAL4B_HUMAN | Peptidylprolyl cis-trans isomerase A-like 4B OS=Homo sapiens GN=PPIAL4B PE=1 SV=1 | 2 | 141 |
| 147 | HV316_HUMAN | Ig heavy chain V-III region TEI OS=Homo sapiens PE=1 SV=1                         | 1 | 140 |
| 148 | K1C24_HUMAN | Keratin, type I cytoskeletal 24 OS=Homo sapiens GN=KRT24 PE=1 SV=1                | 3 | 140 |
| 149 | ACTA_HUMAN  | Actin, aortic smooth muscle OS=Homo sapiens GN=ACTA2 PE=1 SV=1                    | 2 | 138 |
| 150 | ACTC_HUMAN  | Actin, alpha cardiac muscle 1 OS=Homo sapiens GN=ACTC1 PE=1 SV=1                  | 2 | 138 |
| 151 | ACTH_HUMAN  | Actin, gamma-enteric smooth muscle OS=Homo sapiens GN=ACTG2 PE=1 SV=1             | 2 | 138 |
| 152 | ACTS_HUMAN  | Actin, alpha skeletal muscle OS=Homo sapiens GN=ACTA1 PE=1 SV=1                   | 2 | 138 |
| 153 | GDIR2_HUMAN | Rho GDP-dissociation inhibitor 2 OS=Homo sapiens GN=ARHGDIB PE=1 SV=3             | 3 | 137 |
| 154 | ENOA_HUMAN  | Alpha-enolase OS=Homo sapiens GN=ENO1 PE=1 SV=2                                   | 2 | 135 |
| 155 | TSP1_HUMAN  | Thrombospondin-1 OS=Homo sapiens GN=THBS1 PE=1 SV=2                               | 3 | 135 |
| 156 | HV301_HUMAN | Ig heavy chain V-III region TRO OS=Homo sapiens PE=1 SV=1                         | 2 | 133 |
| 157 | K1C28_HUMAN | Keratin, type I cytoskeletal 28 OS=Homo sapiens GN=KRT28 PE=1 SV=1                | 3 | 133 |

|     |             |                                                                                                        |   |     |
|-----|-------------|--------------------------------------------------------------------------------------------------------|---|-----|
| 158 | K2C7_HUMAN  | SV=1<br>Keratin, type II cytoskeletal 7 OS=Homo sapiens GN=KRT7 PE=1                                   | 2 | 133 |
| 159 | K2C8_HUMAN  | SV=3<br>Keratin, type II cytoskeletal 8 OS=Homo sapiens GN=KRT8 PE=1<br>SV=7                           | 2 | 133 |
| 160 | ACTBM_HUMAN | Beta-actin-like protein 3 OS=Homo sapiens GN=ACTBL3 PE=1 SV=1                                          | 2 | 132 |
| 161 | IGHM_HUMAN  | Ig mu chain C region OS=Homo sapiens GN=IGHM PE=1 SV=3                                                 | 2 | 131 |
| 162 | PGRP_HUMAN  | Peptidoglycan recognition protein OS=Homo sapiens GN=PGLYRP1<br>PE=1 SV=1                              | 2 | 131 |
| 163 | ACTBL_HUMAN | Beta-actin-like protein 2 OS=Homo sapiens GN=ACTBL2 PE=1 SV=2                                          | 2 | 130 |
| 164 | K2C4_HUMAN  | Keratin, type II cytoskeletal 4 OS=Homo sapiens GN=KRT4 PE=1<br>SV=4                                   | 2 | 128 |
| 165 | KNG1_HUMAN  | Kininogen-1 OS=Homo sapiens GN=KNG1 PE=1 SV=2                                                          | 3 | 127 |
| 166 | S10AB_HUMAN | Protein S100-A11 OS=Homo sapiens GN=S100A11 PE=1 SV=2                                                  | 2 | 127 |
| 167 | HS71L_HUMAN | Heat shock 70 kDa protein 1L OS=Homo sapiens GN=HSPA1L PE=1<br>SV=2                                    | 3 | 125 |
| 168 | HSP71_HUMAN | Heat shock 70 kDa protein 1 OS=Homo sapiens GN=HSPA1A PE=1<br>SV=5                                     | 3 | 125 |
| 169 | HSP76_HUMAN |                                                                                                        | 3 | 125 |
| 170 | HSP77_HUMAN |                                                                                                        | 3 | 125 |
| 171 | ZAGL1_HUMAN | Putative zinc-alpha-2-glycoprotein-like 1 OS=Homo sapiens PE=5<br>SV=2                                 | 3 | 121 |
| 172 | HV302_HUMAN | Ig heavy chain V-III region WEA OS=Homo sapiens PE=1 SV=1                                              | 2 | 115 |
| 173 | KV401_HUMAN | Ig kappa chain V-IV region (Fragment) OS=Homo sapiens GN=IGKV4-<br>1 PE=2 SV=1                         | 2 | 115 |
| 174 | KV403_HUMAN | Ig kappa chain V-IV region JI OS=Homo sapiens PE=2 SV=1                                                | 2 | 115 |
| 175 | TRY1_HUMAN  | Trypsin-1 OS=Homo sapiens GN=PRSS1 PE=1 SV=1                                                           | 2 | 115 |
| 176 | COTL1_HUMAN | Coactosin-like protein OS=Homo sapiens GN=COTL1 PE=1 SV=3                                              | 2 | 112 |
| 177 | ILEU_HUMAN  | Leukocyte elastase inhibitor OS=Homo sapiens GN=SERPINB1 PE=1<br>SV=1                                  | 2 | 112 |
| 178 | K2C3_HUMAN  | Keratin, type II cytoskeletal 3 OS=Homo sapiens GN=KRT3 PE=1<br>SV=2                                   | 2 | 112 |
| 179 | TITIN_HUMAN | Titin OS=Homo sapiens GN=TTN PE=1 SV=2                                                                 | 4 | 111 |
| 180 | HSP72_HUMAN | Heat shock-related 70 kDa protein 2 OS=Homo sapiens GN=HSPA2<br>PE=1 SV=1                              | 3 | 110 |
| 181 | HSP7C_HUMAN | Heat shock cognate 71 kDa protein OS=Homo sapiens GN=HSPA8<br>PE=1 SV=1                                | 3 | 110 |
| 182 | KV122_HUMAN | Ig kappa chain V-I region BAN OS=Homo sapiens PE=1 SV=1                                                | 1 | 109 |
| 183 | KV308_HUMAN | Ig kappa chain V-III region CLL OS=Homo sapiens PE=1 SV=2                                              | 2 | 109 |
| 184 | K2C71_HUMAN | Keratin, type II cytoskeletal 71 OS=Homo sapiens GN=KRT71 PE=1<br>SV=2                                 | 2 | 108 |
| 185 | K2C72_HUMAN |                                                                                                        | 2 | 108 |
| 186 | K22O_HUMAN  | Keratin, type II cytoskeletal 2 oral OS=Homo sapiens GN=KRT76 PE=1<br>SV=1                             | 2 | 104 |
| 187 | HV313_HUMAN | Ig heavy chain V-III region POM OS=Homo sapiens PE=1 SV=1                                              | 1 | 101 |
| 188 | HV315_HUMAN | Ig heavy chain V-III region WAS OS=Homo sapiens PE=1 SV=1                                              | 1 | 101 |
| 189 | HV318_HUMAN | Ig heavy chain V-III region TUR OS=Homo sapiens PE=1 SV=1                                              | 1 | 101 |
| 190 | K2C80_HUMAN | Keratin, type II cytoskeletal 80 OS=Homo sapiens GN=KRT80 PE=1<br>SV=2                                 | 2 | 101 |
| 191 | S100P_HUMAN | Protein S100-P OS=Homo sapiens GN=S100P PE=1 SV=2                                                      | 1 | 98  |
| 192 | CAMP_HUMAN  | Cathelicidin antimicrobial peptide OS=Homo sapiens GN=CAMP PE=1<br>SV=1                                | 2 | 96  |
| 193 | EF1G_HUMAN  | Elongation factor 1-gamma OS=Homo sapiens GN=EEF1G PE=1 SV=3                                           | 3 | 95  |
| 194 | TAGL2_HUMAN | Transgelin-2 OS=Homo sapiens GN=TAGLN2 PE=1 SV=3                                                       | 2 | 93  |
| 195 | HV101_HUMAN | Ig heavy chain V-I region EU OS=Homo sapiens PE=1 SV=1                                                 | 1 | 90  |
| 196 | HV106_HUMAN | Ig heavy chain V-I region SIE OS=Homo sapiens PE=1 SV=1                                                | 1 | 90  |
| 197 | HV107_HUMAN | Ig heavy chain V-I region Mot OS=Homo sapiens PE=1 SV=1                                                | 1 | 90  |
| 198 | KV201_HUMAN | Ig kappa chain V-II region Cum OS=Homo sapiens PE=1 SV=1                                               | 1 | 89  |
| 199 | KV204_HUMAN | Ig kappa chain V-II region TEW OS=Homo sapiens PE=1 SV=1                                               | 1 | 89  |
| 200 | KV205_HUMAN | Ig kappa chain V-II region GM607 (Fragment) OS=Homo sapiens PE=4<br>SV=1                               | 1 | 89  |
| 201 | KV206_HUMAN | Ig kappa chain V-II region RPMI 6410 OS=Homo sapiens PE=4 SV=1                                         | 1 | 89  |
| 202 | APOB_HUMAN  | Apolipoprotein B-100 OS=Homo sapiens GN=APOB PE=1 SV=1                                                 | 1 | 87  |
| 203 | RA1L3_HUMAN | Putative heterogeneous nuclear ribonucleoprotein A1-like protein 3<br>OS=Homo sapiens GN=HNRPA1L3 PE=5 | 1 | 87  |
| 204 | ROA1L_HUMAN | Heterogeneous nuclear ribonucleoprotein A1-like protein OS=Homo<br>sapiens GN=HNRNPA1L PE=2 SV=2       | 1 | 87  |
| 205 | ROA1_HUMAN  | Heterogeneous nuclear ribonucleoprotein A1 OS=Homo sapiens<br>GN=HNRNPA1 PE=1 SV=4                     | 1 | 87  |
| 206 | CYTB_HUMAN  | Cystatin-B OS=Homo sapiens GN=CSTB PE=1 SV=2                                                           | 2 | 86  |

|     |             |                                                                                                          |   |    |
|-----|-------------|----------------------------------------------------------------------------------------------------------|---|----|
| 207 | CO1A1_HUMAN | Collagen alpha-1(I) chain OS=Homo sapiens GN=COL1A1 PE=1 SV=4                                            | 3 | 83 |
| 208 | K1C25_HUMAN | Keratin, type I cytoskeletal 25 OS=Homo sapiens GN=KRT25 PE=1 SV=1                                       | 2 | 83 |
| 209 | K1C27_HUMAN | Keratin, type I cytoskeletal 27 OS=Homo sapiens GN=KRT27 PE=1 SV=1                                       | 2 | 83 |
| 210 | KV303_HUMAN |                                                                                                          | 2 | 82 |
| 211 | LV102_HUMAN | Ig lambda chain V-I region HA OS=Homo sapiens PE=1 SV=1                                                  | 1 | 82 |
| 212 | LV106_HUMAN | Ig lambda chain V-I region WAH OS=Homo sapiens PE=1 SV=1                                                 | 1 | 82 |
| 213 | CFAD_HUMAN  | Complement factor D OS=Homo sapiens GN=CFD PE=1 SV=5                                                     | 3 | 81 |
| 214 | K2C1B_HUMAN |                                                                                                          | 1 | 81 |
| 215 | FETUA_HUMAN | Alpha-2-HS-glycoprotein OS=Homo sapiens GN=AHSG PE=1 SV=1                                                | 2 | 80 |
| 216 | CALM_HUMAN  | Calmodulin OS=Homo sapiens GN=CALM1 PE=1 SV=2                                                            | 2 | 79 |
| 217 | MMP8_HUMAN  | Neutrophil collagenase OS=Homo sapiens GN=MMP8 PE=1 SV=1                                                 | 2 | 79 |
| 218 | MYO5B_HUMAN |                                                                                                          | 2 | 78 |
| 219 | DYH5_HUMAN  | Dynein heavy chain 5, axonemal OS=Homo sapiens GN=DNAH5 PE=1 SV=3                                        | 2 | 77 |
| 220 | KRT38_HUMAN |                                                                                                          | 2 | 77 |
| 221 | LV301_HUMAN | Ig lambda chain V-III region SH OS=Homo sapiens PE=1 SV=1                                                | 1 | 77 |
| 222 | PEBP1_HUMAN | Phosphatidylethanolamine-binding protein 1 OS=Homo sapiens GN=PEBP1 PE=1 SV=3                            | 2 | 76 |
| 223 | CO6A3_HUMAN | Collagen alpha-3(VI) chain OS=Homo sapiens GN=COL6A3 PE=1 SV=4                                           | 1 | 75 |
| 224 | SH3L3_HUMAN | SH3 domain-binding glutamic acid-rich-like protein 3 OS=Homo sapiens GN=SH3BGRL3 PE=1 SV=1               | 1 | 75 |
| 225 | GFAP_HUMAN  | Glial fibrillary acidic protein OS=Homo sapiens GN=GFAP PE=1 SV=1                                        | 1 | 74 |
| 226 | LUM_HUMAN   | Lumican OS=Homo sapiens GN=LUM PE=1 SV=2                                                                 | 1 | 74 |
| 227 | NPC2_HUMAN  | Epididymal secretory protein E1 OS=Homo sapiens GN=NPC2 PE=1 SV=1                                        | 1 | 74 |
| 228 | PGAM1_HUMAN | Phosphoglycerate mutase 1 OS=Homo sapiens GN=PGAM1 PE=1 SV=2                                             | 2 | 74 |
| 229 | PGAM2_HUMAN | Phosphoglycerate mutase 2 OS=Homo sapiens GN=PGAM2 PE=1 SV=3                                             | 2 | 74 |
| 230 | NIPS1_HUMAN | Protein NipSnap homolog 1 OS=Homo sapiens GN=NIPSNAP1 PE=1 SV=1                                          | 2 | 73 |
| 231 | PTGDS_HUMAN | Prostaglandin-H2 D-isomerase OS=Homo sapiens GN=PTGDS PE=1 SV=1                                          | 1 | 73 |
| 232 | GDIR1_HUMAN | Rho GDP-dissociation inhibitor 1 OS=Homo sapiens GN=ARHGDI1 PE=1 SV=3                                    | 1 | 72 |
| 233 | MOES_HUMAN  | Moesin OS=Homo sapiens GN=MSN PE=1 SV=3                                                                  | 2 | 72 |
| 234 | CALL3_HUMAN | Calmodulin-like protein 3 OS=Homo sapiens GN=CALML3 PE=1 SV=2                                            | 1 | 71 |
| 235 | YP003_HUMAN | Uncharacterized protein UNQ773/PRO1567 OS=Homo sapiens GN=UNQ773/PRO1567 PE=1 SV=3                       | 1 | 71 |
| 236 | CO5_HUMAN   | Complement C5 OS=Homo sapiens GN=C5 PE=1 SV=4                                                            | 2 | 69 |
| 237 | KV120_HUMAN |                                                                                                          | 2 | 69 |
| 238 | PLMN_HUMAN  | Plasminogen OS=Homo sapiens GN=PLG PE=1 SV=2                                                             | 2 | 69 |
| 239 | HV102_HUMAN | Ig heavy chain V-I region HG3 OS=Homo sapiens PE=4 SV=1                                                  | 1 | 67 |
| 240 | EMIL2_HUMAN |                                                                                                          | 2 | 64 |
| 241 | HV311_HUMAN |                                                                                                          | 2 | 63 |
| 242 | K1C12_HUMAN | Keratin, type I cytoskeletal 12 OS=Homo sapiens GN=KRT12 PE=1 SV=1                                       | 1 | 63 |
| 243 | KV113_HUMAN | Ig kappa chain V-I region Lay OS=Homo sapiens PE=1 SV=1                                                  | 1 | 61 |
| 244 | KV306_HUMAN | Ig kappa chain V-III region POM OS=Homo sapiens PE=1 SV=1                                                | 1 | 61 |
| 245 | KV310_HUMAN | Ig kappa chain V-III region VH (Fragment) OS=Homo sapiens PE=4 SV=1                                      | 1 | 61 |
| 246 | ALS_HUMAN   | Insulin-like growth factor-binding protein complex acid labile chain OS=Homo sapiens GN=IGFALS PE=1 SV=1 | 1 | 60 |
| 247 | FHR1_HUMAN  | Complement factor H-related protein 1 OS=Homo sapiens GN=CFHR1 PE=1 SV=2                                 | 1 | 60 |
| 248 | FILA2_HUMAN | Filaggrin-2 OS=Homo sapiens GN=FLG2 PE=1 SV=1                                                            | 1 | 60 |
| 249 | KRT82_HUMAN | Keratin, type II cuticular Hb2 OS=Homo sapiens GN=KRT82 PE=1 SV=3                                        | 1 | 59 |
| 250 | KRT84_HUMAN | Keratin, type II cuticular Hb4 OS=Homo sapiens GN=KRT84 PE=2 SV=1                                        | 1 | 59 |
| 251 | KV405_HUMAN | Ig kappa chain V-IV region STH (Fragment) OS=Homo sapiens PE=1 SV=1                                      | 1 | 59 |
| 252 | CYC_HUMAN   | Cytochrome c OS=Homo sapiens GN=CYCS PE=1 SV=2                                                           | 1 | 58 |
| 253 | HYI_HUMAN   | Putative hydroxypyruvate isomerase OS=Homo sapiens GN=HYI PE=2 SV=2                                      | 2 | 58 |
| 254 | ANR43_HUMAN | Ankyrin repeat domain-containing protein 43 OS=Homo sapiens GN=ANKRD43 PE=2 SV=2                         | 2 | 57 |
| 255 | FKB1A_HUMAN | Peptidyl-prolyl cis-trans isomerase FKBP1A OS=Homo sapiens GN=FKBP1A PE=1 SV=2                           | 1 | 57 |

|     |             |                                                                                             |   |    |
|-----|-------------|---------------------------------------------------------------------------------------------|---|----|
| 256 | GP115_HUMAN | Probable G-protein coupled receptor 115 OS=Homo sapiens<br>GN=GPR115 PE=2 SV=2              | 1 | 57 |
| 257 | IGJ_HUMAN   | Immunoglobulin J chain OS=Homo sapiens GN=IGJ PE=1 SV=3                                     | 1 | 57 |
| 258 | KV404_HUMAN | Ig kappa chain V-IV region B17 OS=Homo sapiens PE=2 SV=1                                    | 1 | 57 |
| 259 | PRDX2_HUMAN | Peroxiredoxin-2 OS=Homo sapiens GN=PRDX2 PE=1 SV=5                                          | 1 | 57 |
| 260 | TRY3_HUMAN  | Trypsin-3 OS=Homo sapiens GN=PRSS3 PE=1 SV=2                                                | 1 | 56 |
| 261 | EXDL1_HUMAN |                                                                                             | 2 | 55 |
| 262 | INT10_HUMAN | Integrator complex subunit 10 OS=Homo sapiens GN=INTS10 PE=1<br>SV=2                        | 2 | 55 |
| 263 | PRTN3_HUMAN | Myeloblastin OS=Homo sapiens GN=PRTN3 PE=1 SV=3                                             | 1 | 55 |
| 264 | SFI1_HUMAN  | Protein SFI1 homolog OS=Homo sapiens GN=SFI1 PE=1 SV=2                                      | 2 | 55 |
| 265 | KV309_HUMAN | Ig kappa chain V-III region VG (Fragment) OS=Homo sapiens PE=4<br>SV=1                      | 1 | 53 |
| 266 | SETX_HUMAN  | Probable helicase senataxin OS=Homo sapiens GN=SETX PE=1 SV=3                               | 2 | 52 |
| 267 | TCPG_HUMAN  |                                                                                             | 2 | 52 |
| 268 | K1C18_HUMAN | Keratin, type I cytoskeletal 18 OS=Homo sapiens GN=KRT18 PE=1<br>SV=2                       | 1 | 50 |
| 269 | K1H1_HUMAN  | Keratin, type I cuticular Ha1 OS=Homo sapiens GN=KRT31 PE=1<br>SV=3                         | 1 | 50 |
| 270 | K1H2_HUMAN  | Keratin, type I cuticular Ha2 OS=Homo sapiens GN=KRT32 PE=1<br>SV=2                         | 1 | 50 |
| 271 | KRT35_HUMAN | Keratin, type I cuticular Ha5 OS=Homo sapiens GN=KRT35 PE=2<br>SV=4                         | 1 | 50 |
| 272 | KRT36_HUMAN | Keratin, type I cuticular Ha6 OS=Homo sapiens GN=KRT36 PE=1<br>SV=1                         | 1 | 50 |
| 273 | KRT37_HUMAN | Keratin, type I cuticular Ha7 OS=Homo sapiens GN=KRT37 PE=2<br>SV=3                         | 1 | 50 |
| 274 | KT33B_HUMAN | Keratin, type I cuticular Ha3-II OS=Homo sapiens GN=KRT33B PE=1<br>SV=3                     | 1 | 50 |
| 275 | HBE_HUMAN   | Hemoglobin subunit epsilon OS=Homo sapiens GN=HBE1 PE=1 SV=2                                | 1 | 48 |
| 276 | MUCB_HUMAN  | Ig mu heavy chain disease protein OS=Homo sapiens PE=1 SV=1                                 | 1 | 47 |
| 277 | PGK1_HUMAN  | Phosphoglycerate kinase 1 OS=Homo sapiens GN=PGK1 PE=1 SV=3                                 | 1 | 47 |
| 278 | 1433B_HUMAN | 14-3-3 protein beta/alpha OS=Homo sapiens GN=YWHAB PE=1 SV=3                                | 1 | 46 |
| 279 | 1433E_HUMAN | 14-3-3 protein epsilon OS=Homo sapiens GN=YWHAE PE=1 SV=1                                   | 1 | 46 |
| 280 | 1433F_HUMAN | 14-3-3 protein eta OS=Homo sapiens GN=YWHAH PE=1 SV=4                                       | 1 | 46 |
| 281 | 1433G_HUMAN | 14-3-3 protein gamma OS=Homo sapiens GN=YWHAG PE=1 SV=2                                     | 1 | 46 |
| 282 | 1433S_HUMAN | 14-3-3 protein sigma OS=Homo sapiens GN=SFN PE=1 SV=1                                       | 1 | 46 |
| 283 | 1433T_HUMAN | 14-3-3 protein theta OS=Homo sapiens GN=YWHAQ PE=1 SV=1                                     | 1 | 46 |
| 284 | K1C20_HUMAN | Keratin, type I cytoskeletal 20 OS=Homo sapiens GN=KRT20 PE=1<br>SV=1                       | 1 | 45 |
| 285 | LDH6A_HUMAN | L-lactate dehydrogenase A-like 6A OS=Homo sapiens GN=LDHAL6A<br>PE=2 SV=1                   | 1 | 45 |
| 286 | LDHB_HUMAN  | L-lactate dehydrogenase B chain OS=Homo sapiens GN=LDHB PE=1<br>SV=2                        | 1 | 45 |
| 287 | LDHC_HUMAN  | L-lactate dehydrogenase C chain OS=Homo sapiens GN=LDHC PE=2<br>SV=4                        | 1 | 45 |
| 288 | NFH_HUMAN   | Neurofilament heavy polypeptide OS=Homo sapiens GN=NEFH PE=1<br>SV=4                        | 1 | 45 |
| 289 | PLAK_HUMAN  | Junction plakoglobin OS=Homo sapiens GN=JUP PE=1 SV=3                                       | 1 | 44 |
| 290 | SHRM3_HUMAN | Protein Shroom3 OS=Homo sapiens GN=SHROOM3 PE=1 SV=1                                        | 1 | 44 |
| 291 | RCOR1_HUMAN | REST corepressor 1 OS=Homo sapiens GN=RCOR1 PE=1 SV=1                                       | 1 | 42 |
| 292 | CD44_HUMAN  | CD44 antigen OS=Homo sapiens GN=CD44 PE=1 SV=2                                              | 1 | 41 |
| 293 | ENOG_HUMAN  |                                                                                             | 1 | 41 |
| 294 | EZRI_HUMAN  | Ezrin OS=Homo sapiens GN=EZR PE=1 SV=4                                                      | 1 | 40 |
| 295 | HERC2_HUMAN | Probable E3 ubiquitin-protein ligase HERC2 OS=Homo sapiens<br>GN=HERC2 PE=1 SV=1            | 2 | 40 |
| 296 | RADI_HUMAN  | Radixin OS=Homo sapiens GN=RDX PE=1 SV=1                                                    | 1 | 40 |
| 297 | BGH3_HUMAN  | Transforming growth factor-beta-induced protein ig-h3 OS=Homo<br>sapiens GN=TGFBI PE=1 SV=1 | 1 | 38 |
| 298 | PGAM4_HUMAN | Probable phosphoglycerate mutase 4 OS=Homo sapiens GN=PGAM4<br>PE=1 SV=1                    | 1 | 38 |
| 299 | GDIB_HUMAN  | Rab GDP dissociation inhibitor beta OS=Homo sapiens GN=GDI2 PE=1<br>SV=2                    | 1 | 37 |
| 300 | TIF1A_HUMAN |                                                                                             | 1 | 37 |
| 301 | TRI33_HUMAN |                                                                                             | 1 | 37 |
| 302 | CLCF1_HUMAN | Cardiotrophin-like cytokine factor 1 OS=Homo sapiens GN=CLCF1<br>PE=1 SV=1                  | 1 | 36 |
| 303 | DYH8_HUMAN  |                                                                                             | 1 | 36 |
| 304 | BARD1_HUMAN |                                                                                             | 1 | 35 |

|     |             |                                                                                         |   |    |
|-----|-------------|-----------------------------------------------------------------------------------------|---|----|
| 305 | COF2_HUMAN  | Cofilin-2 OS=Homo sapiens GN=CFL2 PE=1 SV=1                                             | 1 | 35 |
| 306 | DDX18_HUMAN | ATP-dependent RNA helicase DDX18 OS=Homo sapiens GN=DDX18 PE=1 SV=2                     | 1 | 35 |
| 307 | FABP5_HUMAN | Fatty acid-binding protein, epidermal OS=Homo sapiens GN=FABP5 PE=1 SV=3                | 1 | 35 |
| 308 | HV209_HUMAN | Ig heavy chain V-II region ARH-77 OS=Homo sapiens PE=4 SV=1                             | 1 | 35 |
| 309 | HV309_HUMAN |                                                                                         | 1 | 35 |
| 310 | NEST_HUMAN  |                                                                                         | 1 | 35 |
| 311 | ODF2L_HUMAN |                                                                                         | 1 | 35 |
| 312 | UN45A_HUMAN |                                                                                         | 1 | 35 |
| 313 | CTSR1_HUMAN | Cation channel sperm-associated protein 1 OS=Homo sapiens GN=CATSPER1 PE=1 SV=2         | 1 | 34 |
| 314 | GTPB8_HUMAN |                                                                                         | 1 | 34 |
| 315 | NUMA1_HUMAN |                                                                                         | 1 | 34 |
| 316 | TOP2A_HUMAN |                                                                                         | 1 | 34 |
| 317 | CF163_HUMAN |                                                                                         | 1 | 33 |
| 318 | CQ071_HUMAN |                                                                                         | 1 | 33 |
| 319 | HV310_HUMAN | Ig heavy chain V-III region HIL OS=Homo sapiens PE=1 SV=1                               | 1 | 33 |
| 320 | HV312_HUMAN | Ig heavy chain V-III region BUR OS=Homo sapiens PE=1 SV=1                               | 1 | 33 |
| 321 | MCTP1_HUMAN |                                                                                         | 1 | 33 |
| 322 | MYPT2_HUMAN |                                                                                         | 1 | 33 |
| 323 | SYNE1_HUMAN | Nesprin-1 OS=Homo sapiens GN=SYNE1 PE=1 SV=2                                            | 1 | 33 |
| 324 | ASAP2_HUMAN |                                                                                         | 1 | 32 |
| 325 | ASH1L_HUMAN |                                                                                         | 1 | 32 |
| 326 | CDKL1_HUMAN | Cyclin-dependent kinase-like 1 OS=Homo sapiens GN=CDKL1 PE=2 SV=4                       | 1 | 32 |
| 327 | FHR3_HUMAN  | Complement factor H-related protein 3 OS=Homo sapiens GN=CFHR3 PE=1 SV=2                | 1 | 32 |
| 328 | KIF23_HUMAN | Kinesin-like protein KIF23 OS=Homo sapiens GN=KIF23 PE=1 SV=3                           | 1 | 32 |
| 329 | LRRC7_HUMAN | Leucine-rich repeat-containing protein 7 OS=Homo sapiens GN=LRRC7 PE=1 SV=1             | 1 | 32 |
| 330 | TYW3_HUMAN  | tRNA wybutosine-synthesizing protein 3 homolog OS=Homo sapiens GN=TYW3 PE=2 SV=2        | 1 | 32 |
| 331 | ABCF1_HUMAN | ATP-binding cassette sub-family F member 1 OS=Homo sapiens GN=ABCF1 PE=1 SV=2           | 1 | 31 |
| 332 | EMAL5_HUMAN | Echinoderm microtubule-associated protein-like 5 OS=Homo sapiens GN=EML5 PE=2 SV=3      | 1 | 31 |
| 333 | HUNK_HUMAN  | Hormonally up-regulated neu tumor-associated kinase OS=Homo sapiens GN=HUNK PE=1 SV=1   | 1 | 31 |
| 334 | KAD1_HUMAN  | Adenylate kinase isoenzyme 1 OS=Homo sapiens GN=AK1 PE=1 SV=3                           | 1 | 31 |
| 335 | KIF27_HUMAN |                                                                                         | 1 | 31 |
| 336 | LIMA1_HUMAN |                                                                                         | 1 | 31 |
| 337 | NGF_HUMAN   |                                                                                         | 1 | 31 |
| 338 | S27A6_HUMAN | Long-chain fatty acid transport protein 6 OS=Homo sapiens GN=SLC27A6 PE=1 SV=1          | 1 | 31 |
| 339 | SCN1A_HUMAN |                                                                                         | 1 | 31 |
| 340 | TMTC1_HUMAN | Transmembrane and TPR repeat-containing protein 1 OS=Homo sapiens GN=TMTC1 PE=2 SV=1    | 1 | 31 |
| 341 | AT2B4_HUMAN |                                                                                         | 1 | 30 |
| 342 | CP078_HUMAN |                                                                                         | 1 | 30 |
| 343 | CTGE6_HUMAN | Protein cTAGE-6 OS=Homo sapiens GN=CTAGE6 PE=2 SV=1                                     | 1 | 30 |
| 344 | DAAM1_HUMAN |                                                                                         | 1 | 30 |
| 345 | DACT2_HUMAN |                                                                                         | 1 | 30 |
| 346 | FA5_HUMAN   | Coagulation factor V OS=Homo sapiens GN=F5 PE=1 SV=3                                    | 1 | 30 |
| 347 | NCK2_HUMAN  | Cytoplasmic protein NCK2 OS=Homo sapiens GN=NCK2 PE=1 SV=2                              | 1 | 30 |
| 348 | TBC8B_HUMAN |                                                                                         | 1 | 30 |
| 349 | TDRD1_HUMAN | Tudor domain-containing protein 1 OS=Homo sapiens GN=TDRD1 PE=1 SV=2                    | 1 | 30 |
| 350 | ASPM_HUMAN  | Abnormal spindle-like microcephaly-associated protein OS=Homo sapiens GN=ASPM PE=1 SV=2 | 1 | 29 |
| 351 | CC045_HUMAN | Uncharacterized protein C3orf45 OS=Homo sapiens GN=C3orf45 PE=2 SV=1                    | 1 | 29 |
| 352 | CS010_HUMAN | UPF0556 protein C19orf10 OS=Homo sapiens GN=C19orf10 PE=1 SV=1                          | 1 | 29 |
| 353 | CU062_HUMAN | Uncharacterized protein C21orf62 OS=Homo sapiens GN=C21orf62 PE=2 SV=1                  | 1 | 29 |
| 354 | GSTA4_HUMAN |                                                                                         | 1 | 29 |
| 355 | K1C26_HUMAN | Keratin, type I cytoskeletal 26 OS=Homo sapiens GN=KRT26 PE=1 SV=2                      | 1 | 29 |

|     |             |                                                                                                 |   |    |
|-----|-------------|-------------------------------------------------------------------------------------------------|---|----|
| 356 | LRCC1_HUMAN |                                                                                                 | 1 | 29 |
| 357 | LUZP1_HUMAN | Leucine zipper protein 1 OS=Homo sapiens GN=LUZP1 PE=1 SV=2                                     | 1 | 29 |
| 358 | LV101_HUMAN | Ig lambda chain V-I region VOR OS=Homo sapiens PE=1 SV=1                                        | 1 | 29 |
| 359 | S38AA_HUMAN | Putative sodium-coupled neutral amino acid transporter 10 OS=Homo sapiens GN=SLC38A10 PE=1 SV=2 | 1 | 29 |
| 360 | SASH1_HUMAN | SAM and SH3 domain-containing protein 1 OS=Homo sapiens GN=SASH1 PE=1 SV=3                      | 1 | 29 |
| 361 | UBR4_HUMAN  |                                                                                                 | 1 | 29 |
| 362 | ACSL6_HUMAN |                                                                                                 | 1 | 28 |
| 363 | ADT1_HUMAN  | ADP/ATP translocase 1 OS=Homo sapiens GN=SLC25A4 PE=1 SV=4                                      | 1 | 28 |
| 364 | ADT2_HUMAN  | ADP/ATP translocase 2 OS=Homo sapiens GN=SLC25A5 PE=1 SV=6                                      | 1 | 28 |
| 365 | ADT3_HUMAN  | ADP/ATP translocase 3 OS=Homo sapiens GN=SLC25A6 PE=1 SV=4                                      | 1 | 28 |
| 366 | ADT4_HUMAN  | ADP/ATP translocase 4 OS=Homo sapiens GN=SLC25A31 PE=2 SV=1                                     | 1 | 28 |
| 367 | AQR_HUMAN   |                                                                                                 | 1 | 28 |
| 368 | C144A_HUMAN |                                                                                                 | 1 | 28 |
| 369 | C144C_HUMAN |                                                                                                 | 1 | 28 |
| 370 | CC150_HUMAN | Coiled-coil domain-containing protein 150 OS=Homo sapiens GN=CCDC150 PE=2 SV=2                  | 1 | 28 |
| 371 | COPB_HUMAN  |                                                                                                 | 1 | 28 |
| 372 | ELNE_HUMAN  | Leukocyte elastase OS=Homo sapiens GN=ELA2 PE=1 SV=1                                            | 1 | 28 |
| 373 | FA55A_HUMAN |                                                                                                 | 1 | 28 |
| 374 | IRK13_HUMAN | Inward rectifier potassium channel 13 OS=Homo sapiens GN=KCNJ13 PE=1 SV=1                       | 1 | 28 |
| 375 | KLC1_HUMAN  |                                                                                                 | 1 | 28 |
| 376 | ODB2_HUMAN  |                                                                                                 | 1 | 28 |
| 377 | PCDH8_HUMAN | Protocadherin-8 OS=Homo sapiens GN=PCDH8 PE=2 SV=2                                              | 1 | 28 |
| 378 | PKHM1_HUMAN | Pleckstrin homology domain-containing family M member 1 OS=Homo sapiens GN=PLEKHM1 PE=1 SV=3    | 1 | 28 |
| 379 | RAD1_HUMAN  |                                                                                                 | 1 | 28 |
| 380 | RASA1_HUMAN |                                                                                                 | 1 | 28 |
| 381 | TRAK2_HUMAN |                                                                                                 | 1 | 28 |
| 382 | ZN839_HUMAN | Zinc finger protein 839 OS=Homo sapiens GN=ZNF839 PE=2 SV=1                                     | 1 | 28 |
| 383 | ABR_HUMAN   |                                                                                                 | 1 | 27 |
| 384 | AP4S1_HUMAN |                                                                                                 | 1 | 27 |
| 385 | CIP4_HUMAN  | Cdc42-interacting protein 4 OS=Homo sapiens GN=TRIP10 PE=1 SV=3                                 | 1 | 27 |
| 386 | FSD2_HUMAN  |                                                                                                 | 1 | 27 |
| 387 | GANC_HUMAN  |                                                                                                 | 1 | 27 |
| 388 | GIT2_HUMAN  |                                                                                                 | 1 | 27 |
| 389 | GULP1_HUMAN | PTB domain-containing engulfment adapter protein 1 OS=Homo sapiens GN=GULP1 PE=1 SV=1           | 1 | 27 |
| 390 | PDZD4_HUMAN | PDZ domain-containing protein 4 OS=Homo sapiens GN=PDZD4 PE=2 SV=1                              | 1 | 27 |
| 391 | PRR11_HUMAN |                                                                                                 | 1 | 27 |
| 392 | R3GEF_HUMAN | Guanine nucleotide exchange factor for Rab3A OS=Homo sapiens GN=RAB3IL1 PE=2 SV=1               | 1 | 27 |
| 393 | RICH2_HUMAN | Rho GTPase-activating protein RICH2 OS=Homo sapiens GN=RICH2 PE=1 SV=1                          | 1 | 27 |
| 394 | RL1D1_HUMAN |                                                                                                 | 1 | 27 |
| 395 | RYR2_HUMAN  |                                                                                                 | 1 | 27 |
| 396 | SAA4_HUMAN  | Serum amyloid A-4 protein OS=Homo sapiens GN=SAA4 PE=1 SV=1                                     | 1 | 27 |
| 397 | SCN7A_HUMAN |                                                                                                 | 1 | 27 |
| 398 | SPTA1_HUMAN | Spectrin alpha chain, erythrocyte OS=Homo sapiens GN=SPTA1 PE=1 SV=3                            | 1 | 27 |
| 399 | SRBP2_HUMAN | Sterol regulatory element-binding protein 2 OS=Homo sapiens GN=SREBF2 PE=1 SV=2                 | 1 | 27 |
| 400 | TNIK_HUMAN  |                                                                                                 | 1 | 27 |
| 401 | UD110_HUMAN | UDP-glucuronosyltransferase 1-10 OS=Homo sapiens GN=UGT1A10 PE=2 SV=1                           | 1 | 27 |
| 402 | UD17_HUMAN  | UDP-glucuronosyltransferase 1-7 OS=Homo sapiens GN=UGT1A7 PE=1 SV=2                             | 1 | 27 |
| 403 | UD18_HUMAN  | UDP-glucuronosyltransferase 1-8 OS=Homo sapiens GN=UGT1A8 PE=2 SV=1                             | 1 | 27 |
| 404 | ZFR2_HUMAN  | Zinc finger RNA-binding protein 2 OS=Homo sapiens GN=ZFR2 PE=2 SV=2                             | 1 | 27 |
| 405 | AN34B_HUMAN |                                                                                                 | 1 | 26 |
| 406 | DJC15_HUMAN | DnaJ homolog subfamily C member 15 OS=Homo sapiens GN=DNAJC15 PE=1 SV=2                         | 1 | 26 |
| 407 | DTWD1_HUMAN | DTW domain-containing protein 1 OS=Homo sapiens GN=DTWD1 PE=2 SV=1                              | 1 | 26 |



|     |             |                                                                                                           |   |    |
|-----|-------------|-----------------------------------------------------------------------------------------------------------|---|----|
| 408 | ES8L2_HUMAN | Epidermal growth factor receptor kinase substrate 8-like protein 2<br>OS=Homo sapiens GN=EPS8L2 PE=1 SV=1 | 1 | 26 |
| 409 | H90B4_HUMAN |                                                                                                           | 1 | 26 |
| 410 | KBTB5_HUMAN | Kelch repeat and BTB domain-containing protein 5 OS=Homo sapiens<br>GN=KBTBD5 PE=2 SV=2                   | 1 | 26 |
| 411 | LBN_HUMAN   |                                                                                                           | 1 | 26 |
| 412 | LMNB2_HUMAN | Lamin-B2 OS=Homo sapiens GN=LMNB2 PE=1 SV=3                                                               | 1 | 26 |
| 413 | SHAN1_HUMAN | SH3 and multiple ankyrin repeat domains protein 1 OS=Homo sapiens<br>GN=SHANK1 PE=1 SV=1                  | 1 | 26 |
| 414 | SPTN2_HUMAN |                                                                                                           | 1 | 26 |
| 415 | STXB5_HUMAN |                                                                                                           | 1 | 26 |
| 416 | YD002_HUMAN | Uncharacterized protein FLJ44066 OS=Homo sapiens PE=1 SV=1                                                | 1 | 26 |
| 417 | ACSS3_HUMAN | Acyl-CoA synthetase short-chain family member 3, mitochondrial<br>OS=Homo sapiens GN=ACSS3 PE=2 SV=1      | 1 | 25 |
| 418 | ASAP1_HUMAN | Arf-GAP with SH3 domain, ANK repeat and PH domain-containing<br>protein 1 OS=Homo sapiens GN=ASAP1 PE=1   | 1 | 25 |
| 419 | CA085_HUMAN |                                                                                                           | 1 | 25 |
| 420 | CAPZB_HUMAN | F-actin-capping protein subunit beta OS=Homo sapiens GN=CAPZB<br>PE=1 SV=4                                | 1 | 25 |
| 421 | CI068_HUMAN | Uncharacterized protein C9orf68 OS=Homo sapiens GN=C9orf68 PE=2<br>SV=2                                   | 1 | 25 |
| 422 | CING_HUMAN  |                                                                                                           | 1 | 25 |
| 423 | CLCA1_HUMAN |                                                                                                           | 1 | 25 |
| 424 | DUS27_HUMAN |                                                                                                           | 1 | 25 |
| 425 | E41L1_HUMAN |                                                                                                           | 1 | 25 |
| 426 | FMT_HUMAN   |                                                                                                           | 1 | 25 |
| 427 | FND3A_HUMAN |                                                                                                           | 1 | 25 |
| 428 | GLSK_HUMAN  |                                                                                                           | 1 | 25 |
| 429 | ITA11_HUMAN | Integrin alpha-11 OS=Homo sapiens GN=ITGA11 PE=1 SV=1                                                     | 1 | 25 |
| 430 | KCNQ5_HUMAN |                                                                                                           | 1 | 25 |
| 431 | LS14A_HUMAN | Protein LSM14 homolog A OS=Homo sapiens GN=LSM14A PE=1 SV=3                                               | 1 | 25 |
| 432 | M18BP_HUMAN | Mis18-binding protein 1 OS=Homo sapiens GN=M18BP1 PE=1 SV=1                                               | 1 | 25 |
| 433 | NBPF3_HUMAN |                                                                                                           | 1 | 25 |
| 434 | NEK2_HUMAN  |                                                                                                           | 1 | 25 |
| 435 | NXT2_HUMAN  |                                                                                                           | 1 | 25 |
| 436 | PA1B2_HUMAN |                                                                                                           | 1 | 25 |
| 437 | PI4KA_HUMAN |                                                                                                           | 1 | 25 |
| 438 | PREX1_HUMAN |                                                                                                           | 1 | 25 |
| 439 | PRP19_HUMAN |                                                                                                           | 1 | 25 |
| 440 | RHDF2_HUMAN |                                                                                                           | 1 | 25 |
| 441 | YC024_HUMAN |                                                                                                           | 1 | 25 |
| 442 | ACINU_HUMAN | Apoptotic chromatin condensation inducer in the nucleus OS=Homo<br>sapiens GN=ACIN1 PE=1 SV=1             | 1 | 24 |
| 443 | ADCY9_HUMAN | Adenylate cyclase type 9 OS=Homo sapiens GN=ADCY9 PE=1 SV=4                                               | 1 | 24 |
| 444 | ATS4_HUMAN  |                                                                                                           | 1 | 24 |
| 445 | DEPP_HUMAN  |                                                                                                           | 1 | 24 |
| 446 | DOC11_HUMAN | Dedicator of cytokinesis protein 11 OS=Homo sapiens GN=DOCK11<br>PE=1 SV=2                                | 1 | 24 |
| 447 | NETR_HUMAN  | Neurotrypsin OS=Homo sapiens GN=PRSS12 PE=2 SV=1                                                          | 1 | 24 |
| 448 | PININ_HUMAN | Pinin OS=Homo sapiens GN=PNN PE=1 SV=4                                                                    | 1 | 24 |
| 449 | SACS_HUMAN  | Sacsin OS=Homo sapiens GN=SACS PE=1 SV=2                                                                  | 1 | 24 |
| 450 | SDCG3_HUMAN |                                                                                                           | 1 | 24 |
| 451 | TNR6C_HUMAN |                                                                                                           | 1 | 24 |
| 452 | UNC79_HUMAN |                                                                                                           | 1 | 24 |
| 453 | ZCH18_HUMAN | Zinc finger CCCH domain-containing protein 18 OS=Homo sapiens<br>GN=ZC3H18 PE=1 SV=1                      | 1 | 24 |
| 454 | ZFHX4_HUMAN | Zinc finger homeobox protein 4 OS=Homo sapiens GN=ZFHX4 PE=1<br>SV=1                                      | 1 | 24 |
| 455 | ZN469_HUMAN |                                                                                                           | 1 | 24 |
| 456 | 5NT3L_HUMAN |                                                                                                           | 1 | 23 |
| 457 | ABCA3_HUMAN |                                                                                                           | 1 | 23 |
| 458 | BMPR2_HUMAN | Bone morphogenetic protein receptor type-2 OS=Homo sapiens<br>GN=BMPR2 PE=1 SV=2                          | 1 | 23 |
| 459 | CAC1A_HUMAN |                                                                                                           | 1 | 23 |
| 460 | ESYT1_HUMAN |                                                                                                           | 1 | 23 |
| 461 | ETV3_HUMAN  | ETS translocation variant 3 OS=Homo sapiens GN=ETV3 PE=2 SV=2                                             | 1 | 23 |
| 462 | MP2K7_HUMAN | Dual specificity mitogen-activated protein kinase kinase 7 OS=Homo<br>sapiens GN=MAP2K7 PE=1 SV=2         | 1 | 23 |

|     |             |                                                                                                  |   |    |
|-----|-------------|--------------------------------------------------------------------------------------------------|---|----|
| 463 | MXRA5_HUMAN | Matrix-remodeling-associated protein 5 OS=Homo sapiens GN=MXRA5 PE=2 SV=2                        | 1 | 23 |
| 464 | NSF1C_HUMAN | NSFL1 cofactor p47 OS=Homo sapiens GN=NSFL1C PE=1 SV=2                                           | 1 | 23 |
| 465 | PERQ1_HUMAN |                                                                                                  | 1 | 23 |
| 466 | SYNE2_HUMAN |                                                                                                  | 1 | 23 |
| 467 | TM168_HUMAN | Transmembrane protein 168 OS=Homo sapiens GN=TMEM168 PE=1 SV=2                                   | 1 | 23 |
| 468 | ABI2_HUMAN  | Abl interactor 2 OS=Homo sapiens GN=ABI2 PE=1 SV=1                                               | 1 | 22 |
| 469 | CA125_HUMAN | Uncharacterized protein C1orf125 OS=Homo sapiens GN=C1orf125 PE=2 SV=1                           | 1 | 22 |
| 470 | FA20A_HUMAN | Protein FAM20A OS=Homo sapiens GN=FAM20A PE=2 SV=3                                               | 1 | 22 |
| 471 | KBTB6_HUMAN |                                                                                                  | 1 | 22 |
| 472 | KBTB7_HUMAN |                                                                                                  | 1 | 22 |
| 473 | PK11P_HUMAN | p21-activated protein kinase-interacting protein 1 OS=Homo sapiens GN=PAK1IP1 PE=1 SV=2          | 1 | 22 |
| 474 | PTGR2_HUMAN | Prostaglandin reductase 2 OS=Homo sapiens GN=PTGR2 PE=1 SV=1                                     | 1 | 22 |
| 475 | SYSC_HUMAN  |                                                                                                  | 1 | 22 |
| 476 | VSIG6_HUMAN | Putative V-set and immunoglobulin domain-containing protein 6 OS=Homo sapiens GN=VSIG6 PE=5 SV=2 | 1 | 22 |
| 477 | ANK3_HUMAN  |                                                                                                  | 1 | 21 |
| 478 | AP1B1_HUMAN | AP-1 complex subunit beta-1 OS=Homo sapiens GN=AP1B1 PE=1 SV=1                                   | 1 | 21 |
| 479 | B2L13_HUMAN | Bcl-2-like protein 13 OS=Homo sapiens GN=BCL2L13 PE=1 SV=1                                       | 1 | 21 |
| 480 | CS018_HUMAN | Uncharacterized protein C19orf18 OS=Homo sapiens GN=C19orf18 PE=2 SV=1                           | 1 | 21 |
| 481 | CXCL2_HUMAN |                                                                                                  | 1 | 21 |
| 482 | DACT1_HUMAN | Dapper homolog 1 OS=Homo sapiens GN=DACT1 PE=2 SV=2                                              | 1 | 21 |
| 483 | FILA_HUMAN  | Filaggrin OS=Homo sapiens GN=FLG PE=1 SV=3                                                       | 1 | 21 |
| 484 | KIF4A_HUMAN |                                                                                                  | 1 | 21 |
| 485 | KIF4B_HUMAN |                                                                                                  | 1 | 21 |
| 486 | PEBP4_HUMAN |                                                                                                  | 1 | 21 |
| 487 | PM2L2_HUMAN |                                                                                                  | 1 | 21 |
| 488 | VP13D_HUMAN | Vacuolar protein sorting-associated protein 13D OS=Homo sapiens GN=VPS13D PE=1 SV=1              | 1 | 21 |
| 489 | ANM3_HUMAN  |                                                                                                  | 1 | 20 |
| 490 | DPOE1_HUMAN | DNA polymerase epsilon catalytic subunit A OS=Homo sapiens GN=POLE PE=1 SV=5                     | 1 | 20 |
| 491 | KPBB_HUMAN  | Phosphorylase b kinase regulatory subunit beta OS=Homo sapiens GN=PHKB PE=1 SV=3                 | 1 | 20 |
| 492 | PTN3_HUMAN  |                                                                                                  | 1 | 20 |
| 493 | SPD2B_HUMAN | SH3 and PX domain-containing protein 2B OS=Homo sapiens GN=SH3PXD2B PE=1 SV=2                    | 1 | 20 |
| 494 | UBR2_HUMAN  |                                                                                                  | 1 | 20 |
| 495 | ANKAR_HUMAN | Ankyrin and armadillo repeat-containing protein OS=Homo sapiens GN=ANKAR PE=2 SV=2               | 1 | 19 |
| 496 | RS19_HUMAN  |                                                                                                  | 1 | 19 |
| 497 | SREC2_HUMAN | Scavenger receptor class F member 2 OS=Homo sapiens GN=SCARF2 PE=1 SV=3                          | 1 | 19 |
| 498 | CC032_HUMAN | Uncharacterized protein C3orf32 OS=Homo sapiens GN=C3orf32 PE=2 SV=1                             | 1 | 18 |
| 499 | HEMH_HUMAN  |                                                                                                  | 1 | 18 |
| 500 | HIPK3_HUMAN | Homeodomain-interacting protein kinase 3 OS=Homo sapiens GN=HIPK3 PE=1 SV=1                      | 1 | 18 |
| 501 | MYST3_HUMAN | Histone acetyltransferase MYST3 OS=Homo sapiens GN=MYST3 PE=1 SV=2                               | 1 | 18 |
| 502 | DLGP4_HUMAN | Disks large-associated protein 4 OS=Homo sapiens GN=DLGAP4 PE=1 SV=3                             | 1 | 17 |
| 503 | NEK5_HUMAN  |                                                                                                  | 1 | 17 |
| 504 | ZN541_HUMAN |                                                                                                  | 1 | 17 |
| 505 | TUSC2_HUMAN | Tumor suppressor candidate 2 OS=Homo sapiens GN=TUSC2 PE=1 SV=3                                  | 1 | 16 |
| 506 | TTLL4_HUMAN |                                                                                                  | 1 | 15 |
| 507 | ALG5_HUMAN  |                                                                                                  | 1 | 14 |

1. Consortium, U., *The Universal Protein Resource (UniProt) 2009*. Nucleic Acids Res, 2009. 37(Database issue): p. D169-74.
