# Supplementary material
Source: PubMed Central journal article supplement (PMC3470480)
Supplement: NIHMS397435-supplement-Supplemental_Table_2.pdf [file NIHMS397435-supplement-Supplemental_Table_2.pdf]

**Supplementary Table 2: Analysis of the enrichment of biological annotations using the DAVID knowledgebase.** The 217 confidently identified protein IDs were matched to 161 genes, which then were submitted to the DAVID enrichment analysis tool containing a total of 12983 annotated genes. For example, 27 of the submitted gene codes (15.2%) were annotated with peptidase inhibitor activity, which represents a ~14 fold increase over the number of matches observed in the entire gene population.

| Term                                              | Count | %    | PValue   | Genes                                                                                                                                                                                                                                                                                                                                                                                                                                                                                                                                     | Pop Hits | Fold Enrich. | Bonferroni | Benjamini | FDR      |
|---------------------------------------------------|-------|------|----------|-------------------------------------------------------------------------------------------------------------------------------------------------------------------------------------------------------------------------------------------------------------------------------------------------------------------------------------------------------------------------------------------------------------------------------------------------------------------------------------------------------------------------------------------|----------|--------------|------------|-----------|----------|
| GO:0005198~structural molecule activity           | 48    | 27.1 | 1.86E-24 | K1C10_HUMAN,UBIQ_HUMAN,K1C28_HUMAN,CH3L1_HUMAN,K2C7_HUMAN,ACTS_HUMAN,ACTN3_HUMAN,K2C6C_HUMAN,K1C9_HUMAN,K1C15_HUMAN,K22E_HUMAN,K2C4_HUMAN,KRT38_HUMAN,ACTB_HUMAN,CYTA_HUMAN,K2C6A_HUMAN,K1C16_HUMAN,K2C72_HUMAN,LMNA_HUMAN,K2C1_HUMAN,K2C5_HUMAN,K1C25_HUMAN,K2C6B_HUMAN,K2C71_HUMAN,K2C73_HUMAN,TSP1_HUMAN,MOES_HUMAN,K22O_HUMAN,K1C17_HUMAN,K2C8_HUMAN,K2C3_HUMAN,K2C79_HUMAN,K2C80_HUMAN,K1C19_HUMAN,K1C13_HUMAN,K1C24_HUMAN,K1C27_HUMAN,K1C14_HUMAN,EMIL2_HUMAN,CO1A1_HUMAN,ACTN2_HUMAN,TITIN_HUMAN,K2C75_HUMAN,FINC_HUMAN,ACTG_HUMAN | 634      | 6.11         | 5.06E-22   | 5.06E-22  | 2.45E-21 |
| GO:0004866~endopeptidase inhibitor activity       | 27    | 15.2 | 2.83E-23 | AMBP_HUMAN,A2MG_HUMAN,ITIH2_HUMAN,CYTB_HUMAN,CO3_HUMAN,ANGT_HUMAN,ITIH4_HUMAN,GRP78_HUMAN,CO4B_HUMAN,KNG1_HUMAN,A1AT_HUMAN,ILEU_HUMAN,ITIH1_HUMAN,CYTA_HUMAN,CYTT_HUMAN,ANT3_HUMAN,PEBP1_HUMAN,AAC T_HUMAN,PZP_HUMAN,HRG_HUMAN,FETUA_HUMAN,CO5_HUMAN,IC1_HUMAN,PEDF_HUMAN,CYTN_HUMAN,CYTS_HUMAN,CO4A_HUMAN                                                                                                                                                                                                                                | 145      | 15.02        | 7.69E-21   | 3.84E-21  | 3.72E-20 |
| GO:0030414~peptidase inhibitor activity           | 27    | 15.2 | 1.20E-22 | AMBP_HUMAN,A2MG_HUMAN,ITIH2_HUMAN,CYTB_HUMAN,CO3_HUMAN,ANGT_HUMAN,ITIH4_HUMAN,GRP78_HUMAN,CO4B_HUMAN,KNG1_HUMAN,A1AT_HUMAN,ILEU_HUMAN,ITIH1_HUMAN,CYTA_HUMAN,CYTT_HUMAN,ANT3_HUMAN,PEBP1_HUMAN,AAC T_HUMAN,PZP_HUMAN,HRG_HUMAN,FETUA_HUMAN,CO5_HUMAN,IC1_HUMAN,PEDF_HUMAN,CYTN_HUMAN,CYTS_HUMAN,CO4A_HUMAN                                                                                                                                                                                                                                | 153      | 14.23        | 3.26E-20   | 1.09E-20  | 1.58E-19 |
| GO:0004857~enzyme inhibitor activity              | 28    | 15.8 | 2.39E-17 | AMBP_HUMAN,A2MG_HUMAN,ITIH2_HUMAN,CYTB_HUMAN,CO3_HUMAN,ANGT_HUMAN,ITIH4_HUMAN,GRP78_HUMAN,CO4B_HUMAN,KNG1_HUMAN,A1AT_HUMAN,ILEU_HUMAN,ITIH1_HUMAN,CYTA_HUMAN,CYTT_HUMAN,ANT3_HUMAN,PEBP1_HUMAN,AAC T_HUMAN,PZP_HUMAN,HRG_HUMAN,FETUA_HUMAN,CO5_HUMAN,IC1_HUMAN,CYTN_HUMAN,PEDF_HUMAN,CYTS_HUMAN,APOA2_HUMAN,CO4A_HUMAN                                                                                                                                                                                                                    | 270      | 8.36         | 6.50E-15   | 1.62E-15  | 3.14E-14 |
| GO:0005200~structural constituent of cytoskeleton | 15    | 8.47 | 2.53E-13 | K2C6B_HUMAN,MOES_HUMAN,K1C17_HUMAN,K1C19_HUMAN,ACTS_HUMAN,K1C9_HUMAN,K1C15_HUMAN,K22E_HUMAN,K1C14_HUMAN,K2C6A_HUMAN,ACTB_HUMAN,K1C16_HUMAN,K2C1_HUMAN,ACTG_HUMAN,K2C5_HUMAN                                                                                                                                                                                                                                                                                                                                                               | 74       | 16.35        | 6.88E-11   | 1.38E-11  | 3.33E-10 |
| GO:0003823~antigen binding                        | 13    | 7.34 | 2.83E-12 | KV304_HUMAN,KV401_HUMAN,IGHA1_HUMAN,IGHG3_HUMAN,IGHA2_HUMAN,IGHM_HUMAN,IGKC_HUMAN,LAC_HUMAN,HV303_HUMAN,KV102_HUMAN,IGHG1_HUMAN,IGHG2_HUMAN,KV101_HUMAN,IGHG4_HUMAN,KV312_HUMAN                                                                                                                                                                                                                                                                                                                                                           | 56       | 18.72        | 7.70E-10   | 1.28E-10  | 3.73E-09 |

|                                                                                        |    |      |          |                                                                                                                                                                                            |     |       |          |          |          |
|----------------------------------------------------------------------------------------|----|------|----------|--------------------------------------------------------------------------------------------------------------------------------------------------------------------------------------------|-----|-------|----------|----------|----------|
| GO:0004867~serine-type endopeptidase inhibitor activity                                | 15 | 8.47 | 5.77E-12 | HRG_HUMAN, AMBP_HUMAN, A2MG_HUMAN, ITIH2_HUMAN, IC1_HUMAN, ITIH4_HUMAN, ANGT_HUMAN, PEDF_HUMAN, A1AT_HUMAN, ILEU_HUMAN, ITIH1_HUMAN, ANT3_HUMAN, PZP_HUMAN, AACT_HUMAN, PEBP1_HUMAN        | 92  | 13.15 | 1.57E-09 | 2.24E-10 | 7.60E-09 |
| GO:0004869~cysteine-type endopeptidase inhibitor activity                              | 9  | 5.08 | 1.27E-08 | HRG_HUMAN, FETUA_HUMAN, CYTB_HUMAN, CYTA_HUMAN, CYTT_HUMAN, GRP78_HUMAN, CYTN_HUMAN, CYTS_HUMAN, KNG1_HUMAN                                                                                | 37  | 19.62 | 3.46E-06 | 4.33E-07 | 1.67E-05 |
| GO:0005344~oxygen transporter activity                                                 | 6  | 3.39 | 3.17E-07 | HBD_HUMAN, HBG1_HUMAN, HBB_HUMAN, HBG2_HUMAN, HBA_HUMAN, MYG_HUMAN                                                                                                                         | 13  | 37.22 | 8.63E-05 | 9.59E-06 | 4.18E-04 |
| GO:0019825~oxygen binding                                                              | 7  | 3.95 | 1.33E-05 | HBD_HUMAN, HBG1_HUMAN, HBB_HUMAN, ALBU_HUMAN, HBG2_HUMAN, HBA_HUMAN, MYG_HUMAN                                                                                                             | 43  | 13.13 | 0.003620 | 3.63E-04 | 0.017552 |
| GO:0043499~eukaryotic cell surface binding                                             | 5  | 2.82 | 4.67E-05 | TSP1_HUMAN, FIBA_HUMAN, FIBG_HUMAN, FIBB_HUMAN, APOH_HUMAN                                                                                                                                 | 17  | 23.72 | 0.012610 | 0.001153 | 0.061397 |
| GO:0043498~cell surface binding                                                        | 5  | 2.82 | 4.15E-04 | TSP1_HUMAN, FIBA_HUMAN, FIBG_HUMAN, FIBB_HUMAN, APOH_HUMAN                                                                                                                                 | 29  | 13.90 | 0.106750 | 0.009363 | 0.544826 |
| GO:0016160~amylase activity                                                            | 3  | 1.69 | 4.49E-04 | AMY1_HUMAN, AMYP_HUMAN, AMY2B_HUMAN                                                                                                                                                        | 3   | 80.64 | 0.115023 | 0.009355 | 0.589602 |
| GO:0004556~alpha-amylase activity                                                      | 3  | 1.69 | 4.49E-04 | AMY1_HUMAN, AMYP_HUMAN, AMY2B_HUMAN                                                                                                                                                        | 3   | 80.64 | 0.115023 | 0.009355 | 0.589602 |
| GO:0020037~heme binding                                                                | 8  | 4.52 | 7.38E-04 | AMBP_HUMAN, HBD_HUMAN, HBG1_HUMAN, HBB_HUMAN, HBG2_HUMAN, HBA_HUMAN, HERC2_HUMAN, MYG_HUMAN                                                                                                | 121 | 5.33  | 0.181993 | 0.014246 | 0.967454 |
| GO:0046906~tetrapyrrole binding                                                        | 8  | 4.52 | 0.001076 | AMBP_HUMAN, HBD_HUMAN, HBG1_HUMAN, HBB_HUMAN, HBG2_HUMAN, HBA_HUMAN, HERC2_HUMAN, MYG_HUMAN                                                                                                | 129 | 5.00  | 0.254029 | 0.019348 | 1.408271 |
| GO:0002020~protease binding                                                            | 4  | 2.26 | 0.001539 | A1AT_HUMAN, CYTB_HUMAN, CYTA_HUMAN, ANT3_HUMAN                                                                                                                                             | 19  | 16.98 | 0.342361 | 0.025853 | 2.007769 |
| GO:0003779~actin binding                                                               | 12 | 6.78 | 0.002364 | VTDB_HUMAN, ACTN4_HUMAN, MOES_HUMAN, COF1_HUMAN, COTL1_HUMAN, GELS_HUMAN, PROF1_HUMAN, MYO5B_HUMAN, ACTN2_HUMAN, ACTN3_HUMAN, TITIN_HUMAN, ACTN1_HUMAN                                     | 326 | 2.97  | 0.474746 | 0.037166 | 3.067925 |
| GO:0004252~serine-type endopeptidase activity                                          | 8  | 4.52 | 0.002972 | CFAD_HUMAN, TRY1_HUMAN, HPTR_HUMAN, PLMN_HUMAN, HPT_HUMAN, TRFL_HUMAN, MMP8_HUMAN, CFAB_HUMAN, ENOA_HUMAN                                                                                  | 154 | 4.19  | 0.555045 | 0.043990 | 3.843078 |
| GO:0051082~unfolded protein binding                                                    | 7  | 3.95 | 0.002974 | HSP7C_HUMAN, PPIA_HUMAN, HSP72_HUMAN, HSP71_HUMAN, GRP78_HUMAN, TCPG_HUMAN, PPIB_HUMAN                                                                                                     | 115 | 4.91  | 0.555257 | 0.041748 | 3.845303 |
| GO:0008092~cytoskeletal protein binding                                                | 15 | 8.47 | 0.003799 | VTDB_HUMAN, ACTN4_HUMAN, MOES_HUMAN, COF1_HUMAN, GELS_HUMAN, MYO5B_HUMAN, ACTS_HUMAN, ACTN3_HUMAN, COTL1_HUMAN, PROF1_HUMAN, ACTC_HUMAN, CALM_HUMAN, ACTN2_HUMAN, TITIN_HUMAN, ACTN1_HUMAN | 504 | 2.40  | 0.644909 | 0.050451 | 4.887188 |
| GO:0005506~iron ion binding                                                            | 11 | 6.21 | 0.004849 | AMBP_HUMAN, HBD_HUMAN, HBG1_HUMAN, HBB_HUMAN, HBG2_HUMAN, TRFL_HUMAN, HBA_HUMAN, HERC2_HUMAN, HEMO_HUMAN, MYG_HUMAN, TRFE_HUMAN                                                            | 308 | 2.88  | 0.733487 | 0.061026 | 6.198869 |
| GO:0016861~intramolecular oxidoreductase activity, interconverting aldoses and ketoses | 3  | 1.69 | 0.005133 | HYI_HUMAN, TPIS_HUMAN, G6PI_HUMAN                                                                                                                                                          | 9   | 26.88 | 0.753374 | 0.061648 | 6.550240 |
| GO:0005178~integrin binding                                                            | 5  | 2.82 | 0.005975 | ACTN4_HUMAN, TSP1_HUMAN, ACTN2_HUMAN, ACTN3_HUMAN, ACTN1_HUMAN                                                                                                                             | 59  | 6.83  | 0.804098 | 0.068422 | 7.585798 |
| GO:0008236~serine-type peptidase activity                                              | 8  | 4.52 | 0.006532 | CFAD_HUMAN, TRY1_HUMAN, HPTR_HUMAN, PLMN_HUMAN, HPT_HUMAN, TRFL_HUMAN, MMP8_HUMAN, CFAB_HUMAN, ENOA_HUMAN                                                                                  | 178 | 3.62  | 0.831791 | 0.071581 | 8.264892 |
| GO:0017171~serine hydrolase activity                                                   | 8  | 4.52 | 0.006920 | CFAD_HUMAN, TRY1_HUMAN, HPTR_HUMAN, PLMN_HUMAN, HPT_HUMAN, TRFL_HUMAN, MMP8_HUMAN, CFAB_HUMAN, ENOA_HUMAN                                                                                  | 180 | 3.58  | 0.848755 | 0.072770 | 8.735632 |

|                                                                              |    |      |          |                                                                                                                                                                                                                                                       |     |       |          |          |          |
|------------------------------------------------------------------------------|----|------|----------|-------------------------------------------------------------------------------------------------------------------------------------------------------------------------------------------------------------------------------------------------------|-----|-------|----------|----------|----------|
| GO:0008201~heparin binding                                                   | 6  | 3.39 | 0.008875 | HRG_HUMAN,TSP1_HUMAN,ANT3_HUMAN,KNG1_HUMAN,APOH_HUMAN,FINC_HUMAN                                                                                                                                                                                      | 103 | 4.70  | 0.911521 | 0.089051 | 11.07310 |
| GO:0005509~calcium ion binding                                               | 21 | 11.7 | 0.009187 | ACTN4_HUMAN,TSP1_HUMAN,S10AB_HUMAN,AMY1_HUMAN,GE LS_HUMAN,AMY2B_HUMAN,S10A8_HUMAN,GRP78_HUMAN,ACT N3_HUMAN,TRY1_HUMAN,ITIH1_HUMAN,PLMN_HUMAN,AMYP_H UMAN,CALM_HUMAN,MMP8_HUMAN,S10A9_HUMAN,ACTN2_HU MAN,MMP9_HUMAN,FIBG_HUMAN,TITIN_HUMAN,ACTN1_HUMAN | 919 | 1.84  | 0.918783 | 0.088794 | 11.44091 |
| GO:0001871~pattern binding                                                   | 7  | 3.95 | 0.012064 | HRG_HUMAN,TSP1_HUMAN,ANT3_HUMAN,CHIT1_HUMAN,KNG1_HUMAN,APOH_HUMAN,FINC_HUMAN                                                                                                                                                                          | 154 | 3.67  | 0.963173 | 0.111225 | 14.76640 |
| GO:0030247~polysacc haride binding                                           | 7  | 3.95 | 0.012064 | HRG_HUMAN,TSP1_HUMAN,ANT3_HUMAN,CHIT1_HUMAN,KNG1_HUMAN,APOH_HUMAN,FINC_HUMAN                                                                                                                                                                          | 154 | 3.67  | 0.963173 | 0.111225 | 14.76640 |
| GO:0008307~structur al constituent of muscle                                 | 4  | 2.26 | 0.014839 | ACTN2_HUMAN,K1C19_HUMAN,ACTN3_HUMAN,TITIN_HUMAN                                                                                                                                                                                                       | 42  | 7.68  | 0.982862 | 0.130836 | 17.86402 |
| GO:0051015~actin filament binding                                            | 4  | 2.26 | 0.027462 | ACTN4_HUMAN,MYO5B_HUMAN,TITIN_HUMAN,ACTN1_HUMAN                                                                                                                                                                                                       | 53  | 6.09  | 0.999486 | 0.223127 | 30.68817 |
| GO:0030674~protein binding, bridging                                         | 5  | 2.82 | 0.028813 | CYTA_HUMAN,GRP78_HUMAN,FIBA_HUMAN,FIBG_HUMAN,FIBB_HUMAN                                                                                                                                                                                               | 94  | 4.29  | 0.999648 | 0.226264 | 31.94431 |
| GO:0005539~glycosa minoglycan binding                                        | 6  | 3.39 | 0.029531 | HRG_HUMAN,TSP1_HUMAN,ANT3_HUMAN,KNG1_HUMAN,APOH_HUMAN,FINC_HUMAN                                                                                                                                                                                      | 140 | 3.46  | 0.999712 | 0.224930 | 32.60437 |
| GO:0032403~protein complex binding                                           | 7  | 3.95 | 0.034468 | AMBP_HUMAN,ACTN4_HUMAN,TSP1_HUMAN,1433Z_HUMAN,AC TN2_HUMAN,ACTN3_HUMAN,ACTN1_HUMAN                                                                                                                                                                    | 196 | 2.88  | 0.999928 | 0.251076 | 36.98033 |
| GO:0034190~apolipop rotein receptor binding                                  | 2  | 1.13 | 0.036520 | APOA2_HUMAN,APOA1_HUMAN                                                                                                                                                                                                                               | 3   | 53.76 | 0.999959 | 0.257425 | 38.72046 |
| GO:0030492~hemoglo bin binding                                               | 2  | 1.13 | 0.036520 | HPTR_HUMAN,HBB_HUMAN,HPT_HUMAN                                                                                                                                                                                                                        | 3   | 53.76 | 0.999959 | 0.257425 | 38.72046 |
| GO:0070653~high- density lipoprotein receptor binding                        | 2  | 1.13 | 0.036520 | APOA2_HUMAN,APOA1_HUMAN                                                                                                                                                                                                                               | 3   | 53.76 | 0.999959 | 0.257425 | 38.72046 |
| GO:0004083~2,3- bisphospho-D- glycerate 2- phosphohydrolase activity         | 2  | 1.13 | 0.048396 | PGAM2_HUMAN,PGAM1_HUMAN                                                                                                                                                                                                                               | 4   | 40.32 | 0.999998 | 0.319902 | 47.95132 |
| GO:0004082~bisphos phoglycerate mutase activity                              | 2  | 1.13 | 0.048396 | PGAM2_HUMAN,PGAM1_HUMAN                                                                                                                                                                                                                               | 4   | 40.32 | 0.999998 | 0.319902 | 47.95132 |
| GO:0004619~phospho glycerate mutase activity                                 | 2  | 1.13 | 0.048396 | PGAM2_HUMAN,PGAM1_HUMAN                                                                                                                                                                                                                               | 4   | 40.32 | 0.999998 | 0.319902 | 47.95132 |
| GO:0034416~bisphos phoglycerate phosphatase activity                         | 2  | 1.13 | 0.060127 | PGAM2_HUMAN,PGAM1_HUMAN                                                                                                                                                                                                                               | 5   | 32.26 | 0.999999 | 0.374079 | 55.79225 |
| GO:0060228~phospha tidylcholine-sterol O- acyltransferase activator activity | 2  | 1.13 | 0.060127 | APOA2_HUMAN,APOA1_HUMAN                                                                                                                                                                                                                               | 5   | 32.26 | 0.999999 | 0.374079 | 55.79225 |
| GO:0008034~lipoprot ein binding                                              | 3  | 1.69 | 0.068928 | TSP1_HUMAN,APOA2_HUMAN,APOA1_HUMAN                                                                                                                                                                                                                    | 35  | 6.91  | 0.999999 | 0.408459 | 60.94113 |
| GO:0030246~carbohy drate binding                                             | 9  | 5.08 | 0.071697 | HRG_HUMAN,TSP1_HUMAN,CH3L1_HUMAN,ANT3_HUMAN,CHIT1_HUMAN,KNG1_HUMAN,K2C1_HUMAN,APOH_HUMAN,FINC_HUM AN                                                                                                                                                  | 354 | 2.05  | 0.999999 | 0.412883 | 62.44313 |
| GO:0005518~collagen binding                                                  | 3  | 1.69 | 0.072409 | TSP1_HUMAN,MMP9_HUMAN,FINC_HUMAN                                                                                                                                                                                                                      | 36  | 6.72  | 0.999999 | 0.407989 | 62.82068 |

|                                                         |   |      |          |                                                                                                              |     |       |   |          |          |
|---------------------------------------------------------|---|------|----------|--------------------------------------------------------------------------------------------------------------|-----|-------|---|----------|----------|
| GO:0003755~peptidyl-prolyl cis-trans isomerase activity | 3 | 1.69 | 0.075947 | PPIA_HUMAN,PAL4B_HUMAN,PPIB_HUMAN                                                                            | 37  | 6.54  | 1 | 0.415563 | 64.64445 |
| GO:0016860~intramolecular oxidoreductase activity       | 3 | 1.69 | 0.079539 | HYI_HUMAN,TPIS_HUMAN,G6PI_HUMAN                                                                              | 38  | 6.37  | 1 | 0.422959 | 66.41114 |
| GO:0008035~high-density lipoprotein binding             | 2 | 1.13 | 0.083160 | APOA2_HUMAN,APOA1_HUMAN                                                                                      | 7   | 23.04 | 1 | 0.43009  | 68.10965 |
| GO:0031432~titin binding                                | 2 | 1.13 | 0.083160 | CALM_HUMAN,ACTN2_HUMAN                                                                                       | 7   | 23.04 | 1 | 0.430092 | 68.10965 |
| GO:0016859~cis-trans isomerase activity                 | 3 | 1.69 | 0.083182 | PPIA_HUMAN,PAL4B_HUMAN,PPIB_HUMAN                                                                            | 39  | 6.20  | 1 | 0.422679 | 68.11978 |
| GO:0005201~extracellular matrix structural constituent  | 4 | 2.26 | 0.089876 | CH3L1_HUMAN,CO1A1_HUMAN,EMIL2_HUMAN,FINC_HUMAN                                                               | 86  | 3.75  | 1 | 0.441318 | 71.05145 |
| GO:0004175~endopeptidase activity                       | 9 | 5.08 | 0.092554 | CFAD_HUMAN,TRY1_HUMAN,HPTR_HUMAN,PLMN_HUMAN,HPT_HUMAN,TRFL_HUMAN,MMP8_HUMAN,CFAB_HUMAN,MMP9_HUMAN,ENOA_HUMAN | 375 | 1.94  | 1 | 0.444032 | 72.15257 |
| GO:0001848~complement binding                           | 2 | 1.13 | 0.094465 | IC1_HUMAN,CFAB_HUMAN                                                                                         | 8   | 20.16 | 1 | 0.443868 | 72.91484 |
| GO:0004568~chitinase activity                           | 2 | 1.13 | 0.094465 | CH3L1_HUMAN,CHIT1_HUMAN                                                                                      | 8   | 20.16 | 1 | 0.443868 | 72.91484 |
