# Supplementary material
Source: PubMed Central journal article supplement (PMC3470480)
Supplement: NIHMS397435-supplement-Supplemental_Table_3.pdf [file NIHMS397435-supplement-Supplemental_Table_3.pdf]

**Supplementary Table 3: MS-based evidence for protease inhibitors identified in the microdialysates.** Details of the LC-MS/MS analysis and data processing are described in **Online Methods**. The table shows the MS-based evidence for identified protease inhibitors across microdialysates (+++, >2 peptide identifications with statistical significance below 0.05; ++, 1 hit with p<0.05; + multiple hits with p>0.05).

| UniProt ID  | Protein Name                                  | Cancer |     | Normal |     |
|-------------|-----------------------------------------------|--------|-----|--------|-----|
|             |                                               | 1      | 2   | 1      | 2   |
| A1AT_HUMAN  | Serpin A1 (alpha-1-antitrypsin)               | +++    | +++ | +++    | +++ |
| A2MG_HUMAN  | Alpha-2-macroglobulin                         | +++    | +++ | ++     | +++ |
| AACT_HUMAN  | Serpin A3 (alpha-1-antichymotrypsin)          | +++    | +++ | +++    | +++ |
| AMBP_HUMAN  | Alpha-1 microglycoprotein                     | ++     | ++  | ++     | +++ |
| ANGT_HUMAN  | Serpin A8 (angiotensinogen)                   | ++     | +++ | +++    | +++ |
| ANT3_HUMAN  | Serpin C1 (antithrombin-III)                  | +++    | +++ | +++    | +++ |
| APOA2_HUMAN | Apolipoprotein A2                             | +++    | +++ |        |     |
| CO3_HUMAN   | Complement C3                                 | +++    | +++ | +++    | +++ |
| CO4A_HUMAN  | Complement C4-A                               | +++    | +++ | +      | +++ |
| CO4B_HUMAN  | Complement C4-B                               | +++    | +++ | +      | +++ |
| CO5_HUMAN   | Complement C5                                 | +      | +++ |        | +   |
| CYTA_HUMAN  | Cystatin-A                                    | +++    |     | +      | +++ |
| CYTB_HUMAN  | Cystatin-B                                    |        |     |        | +++ |
| CYTN_HUMAN  | Cystatin-SN                                   |        |     |        | +++ |
| CYTS_HUMAN  | Cystatin-S                                    |        |     |        | +++ |
| CYTT_HUMAN  | Cystatin-SA                                   |        |     |        | +++ |
| FETUA_HUMAN | Alpha-2-HS-glycoprotein                       | ++     | ++  |        |     |
| GRP78_HUMAN | 78 kDa glucose-regulated protein              | +      | +++ |        | +   |
| HRG_HUMAN   | Histidine-proline rich glycoprotein           | +      | +++ | ++     | +++ |
| IC1_HUMAN   | Serpin G1 (plasma protease C1 inhibitor)      | +++    | +++ | +      | ++  |
| ILEU_HUMAN  | Serpin B1 (leukocyte elastase inhibitor)      | +++    | +   | ++     | ++  |
| ITIH1_HUMAN | Inter-alpha-trypsin inhibitor heavy chain H1  | +++    | +++ |        | +++ |
| ITIH2_HUMAN | Inter-alpha-trypsin inhibitor heavy chain H2  | +      | +++ | +      | +   |
| ITIH4_HUMAN | Inter-alpha-trypsin inhibitor heavy chain H4  | +      | +++ | ++     | ++  |
| KNG1_HUMAN  | Kininogen-1                                   | +      | ++  |        | +++ |
| PEBP1_HUMAN | Phosphatidylethanolamine-binding protein 1    | ++     |     | +      | ++  |
| PEDF_HUMAN  | Serpin F1 (pigment epithelium-derived factor) |        | +   | +      | +++ |
| PZP_HUMAN   | Pregnancy zone protein                        | +      | +++ | +      | +++ |
