# Supplementary material
Source: PubMed Central journal article supplement (PMC3470480)
Supplement: NIHMS397435-supplement-Supplemental_Table_4.pdf [file NIHMS397435-supplement-Supplemental_Table_4.pdf]

**Supplementary Table 4: Identified peptide precursor in the microdialysates.**

Details of the LC-MS/MS analysis and data processing are described in **Online Methods**. The table shows the precursor proteins for the peptides that were identified across all microdialysate samples. Score is the aggregated MASCOT score of all peptides below the significance threshold of  $p < 0.05$ . Protein names are stated as UniProt identifiers.

| Rank | UniProt     | Description                                      | # Peptides | Score |
|------|-------------|--------------------------------------------------|------------|-------|
| 1    | FIBA_HUMAN  | Fibrinogen alpha chain                           | 39         | 2867  |
| 2    | ALBU_HUMAN  | Serum albumin                                    | 12         | 803   |
| 3    | FIBB_HUMAN  | Fibrinogen beta chain                            | 11         | 713   |
| 4    | HBB_HUMAN   | Hemoglobin subunit beta                          | 10         | 628   |
| 5    | H15_HUMAN   | Histone H1.5                                     | 9          | 599   |
| 6    | H12_HUMAN   | Histone H1.2                                     | 9          | 591   |
| 7    | H13_HUMAN   | Histone H1.3                                     | 9          | 591   |
| 8    | H14_HUMAN   | Histone H1.4                                     | 9          | 591   |
| 9    | STAT_HUMAN  | Statherin                                        | 8          | 491   |
| 10   | FIBG_HUMAN  | Fibrinogen gamma chain                           | 7          | 473   |
| 11   | H11_HUMAN   | Histone H1.1                                     | 7          | 459   |
| 12   | HBA_HUMAN   | Hemoglobin subunit alpha                         | 6          | 356   |
| 13   | HBD_HUMAN   | Hemoglobin subunit delta                         | 5          | 320   |
| 14   | APOA1_HUMAN | Apolipoprotein A-I                               | 4          | 240   |
| 15   | SMR3B_HUMAN | Submaxillary gland androgen-regulated protein 3B | 4          | 238   |
| 16   | ACTA_HUMAN  | Actin, aortic smooth muscle                      | 3          | 197   |
| 17   | ACTB_HUMAN  | Actin, cytoplasmic 1                             | 3          | 197   |
| 18   | ACTC_HUMAN  | Actin, alpha cardiac muscle 1                    | 3          | 197   |
| 19   | ACTG_HUMAN  | Actin, cytoplasmic 2                             | 3          | 197   |
| 20   | ACTH_HUMAN  | Actin, gamma-enteric smooth muscle               | 3          | 197   |
| 21   | K2C6A_HUMAN | Keratin, type II cytoskeletal 6A                 | 2          | 160   |
| 22   | K2C6C_HUMAN | Keratin, type II cytoskeletal 6C                 | 2          | 160   |
| 23   | A1AT_HUMAN  | Alpha-1-antitrypsin                              | 2          | 154   |
| 24   | A26CA_HUMAN | ANKRD26-like family C member 1A                  | 2          | 112   |
| 25   | A26CB_HUMAN | ANKRD26-like family C member 1B                  | 2          | 112   |
| 26   | ACTS_HUMAN  | Actin, alpha skeletal muscle                     | 2          | 112   |
| 27   | SET1B_HUMAN | Histone-lysine N-methyltransferase SETD1B        | 2          | 104   |
| 28   | K1C17_HUMAN | Keratin, type I cytoskeletal 17                  | 1          | 80    |
| 29   | MYG_HUMAN   | Myoglobin                                        | 1          | 80    |
| 30   | PPM1A_HUMAN | Protein phosphatase 1A                           | 1          | 78    |
| 31   | AACT_HUMAN  | Alpha-1-antichymotrypsin                         | 1          | 75    |
| 32   | CYC_HUMAN   | Cytochrome c                                     | 1          | 63    |
| 33   | DOCK5_HUMAN | Dedicator of cytokinesis protein 5               | 1          | 63    |
| 34   | THRB_HUMAN  | Prothrombin                                      | 1          | 63    |
| 35   | CECR6_HUMAN | Cat eye syndrome critical region protein 6       | 1          | 62    |
| 36   | PO3F3_HUMAN | POU domain, class 3, transcription factor 3      | 1          | 60    |
| 37   | ESPL1_HUMAN | Separin                                          | 1          | 59    |
| 38   | MCR_HUMAN   | Mineralocorticoid receptor                       | 1          | 59    |
| 39   | CO3_HUMAN   | Complement C3                                    | 1          | 58    |
| 40   | VTNC_HUMAN  | Vitronectin                                      | 1          | 55    |
| 41   | FETUA_HUMAN | Alpha-2-HS-glycoprotein                          | 1          | 52    |
| 42   | PRR11_HUMAN | Proline-rich protein                             | 1          | 52    |
| 43   | MAZ_HUMAN   | Myc-associated zinc finger protein               | 1          | 51    |
| 44   | TITIN_HUMAN | Titin                                            | 1          | 50    |
| 45   | PRPC_HUMAN  | Salivary acidic proline-rich phosphoprotein 1/2  | 1          | 46    |
| 46   | CH016_HUMAN | Uncharacterized protein C8orf16                  | 1          | 15    |
| 47   | GSTT4_HUMAN | Glutathione S-transferase theta-4                | 1          | 15    |
| 48   | TRIO_HUMAN  | Triple functional domain protein                 | 1          | 15    |
