# Supplementary material
Source: PubMed Central journal article supplement (PMC3470480)
Supplement: NIHMS397435-supplement-Supplemental_Table_5.pdf [file NIHMS397435-supplement-Supplemental_Table_5.pdf]

### Supplementary Table 5: Endogenous peptides identified in the microdialysates.

Details of the LC-MS/MS analysis and data processing are described in **Online Methods**. The table shows the binned monoisotopic mass of the peptide identification, the number of times the mass was observed, the precursor protein ID, the peptide sequence along with any modification, the original [MH]<sup>+</sup>-value, the mascot score and in which samples the peptide was observed (C1, cancer site of patient 1; N1, matched normal site of patient 1).

| [MH] <sup>+</sup> | ±  | # of peaks | Protein IDs                                               | Peptide identifications                                                                                                                                                                                                                                                                                                                                                                                                                                                           | Samples     |
|-------------------|----|------------|-----------------------------------------------------------|-----------------------------------------------------------------------------------------------------------------------------------------------------------------------------------------------------------------------------------------------------------------------------------------------------------------------------------------------------------------------------------------------------------------------------------------------------------------------------------|-------------|
| 831.507           | 3  | 2          | UPI0000F2BA08                                             | QSPRLI-Deamidated (NQ); Label:18O(2)(C-term)<br>(831.507,24.0,)<br>VGGEALGRL-(871.5,44.0,);<br>VGGEALGRL-(871.5,46.0,);                                                                                                                                                                                                                                                                                                                                                           | C1          |
| 871.5             | 3  | 4          | HBB_HUMAN                                                 | VGGEALGRL-(871.5,48.0,)                                                                                                                                                                                                                                                                                                                                                                                                                                                           | N2          |
| 879.5             | 0  | 2          | THRB_HUMAN                                                | SLLQAGYK-(879.493,40.0,)                                                                                                                                                                                                                                                                                                                                                                                                                                                          | N2          |
| 922.7             | 21 | 5          | ABCCB_HUMAN,<br>CKAP5_HUMAN                               | IILLKPII-(922.67,13.0,);<br>ILIIPKIL-(922.67,22.0,)                                                                                                                                                                                                                                                                                                                                                                                                                               | C1;C2       |
| 927.6             | 9  | 2          | KCNK5_HUMAN<br>CH016_HUMAN,<br>GSTT4_HUMAN,<br>TRIO_HUMAN | LIKQIGKK-(927.635,39.0,)<br>IKPLLKIL-(937.681,14.0,);<br>KPKILILL-(937.681,15.0,);<br>KPKILILL-(937.681,15.0,);<br>LKLLIPKI-(937.681,14.0,)                                                                                                                                                                                                                                                                                                                                       | C1;C2       |
| 937.7             | 3  | 5          |                                                           | LAQSVKPVQ-Deamidated (NQ); Label:18O(2) (C-term)(974.565,13.0,)                                                                                                                                                                                                                                                                                                                                                                                                                   | C1;N2       |
| 974.565           | 27 | 5          | Q9YXD3                                                    |                                                                                                                                                                                                                                                                                                                                                                                                                                                                                   | C1;N2       |
| 981.5             | 8  | 3          | H13_HUMAN                                                 | TGASGSFKLN-(981.5,53.0,)<br>VGGEALGRLL-(984.584,39.0,);<br>VGGEALGRLL-(984.584,45.0,);<br>VGGEALGRLL-(984.584,47.0,);<br>VGGEALGRLL-(984.584,51.0,);<br>VGGEALGRLL-(984.584,56.0,);<br>VGGEALGRLL-(984.584,58.0,);<br>VGGEALGRLL-(984.584,59.0,)                                                                                                                                                                                                                                  | C1;N1       |
| 984.6             | 10 | 10         | HBB_HUMAN                                                 | PNIVSLQDV-2 Deamidated (NQ)(986.504,52.0,);<br>PNIVSLQDV-2 Deamidated (NQ)(986.504,53.0,)                                                                                                                                                                                                                                                                                                                                                                                         | C1;N2       |
| 986.5             | 13 | 3          | CDC2_HUMAN                                                |                                                                                                                                                                                                                                                                                                                                                                                                                                                                                   | C1;N2       |
| 1013.6            | 3  | 2          | ALBU_HUMAN                                                | LVAASQAALGL-(1013.599,45.0,)                                                                                                                                                                                                                                                                                                                                                                                                                                                      | C1;N1       |
| 1020.5            | 15 | 4          | FIBA_HUMAN<br>H13_HUMAN,<br>H14_HUMAN                     | DFLAEGGGVR-(1020.511,50.0,)<br>GTGASGSFKLN-(1038.521,51.0,);<br>GTGASGSFKLN-(1038.521,51.0,);<br>GTGASGSFKLN-(1038.521,52.0,);<br>GTGASGSFKLN-(1038.521,54.0,)                                                                                                                                                                                                                                                                                                                    | C1;C2;N2    |
| 1038.5            | 18 | 8          | H12_HUMAN,<br>H13_HUMAN,<br>H14_HUMAN,<br>H15_HUMAN       | GPPVSELITK-(1040.599,44.0,);<br>GPPVSELITK-(1040.599,47.0,);<br>GPPVSELITK-(1040.599,53.0,);<br>GPPVSELITK-(1040.599,53.0,);<br>GPPVSELITK-(1040.599,59.0,);<br>GPPVSELITK-(1040.599,60.0,)                                                                                                                                                                                                                                                                                       | C1;N2       |
| 1040.6            | 8  | 8          | FIBG_HUMAN,<br>TITIN_HUMAN                                | TSAKLKVEAV-(1045.625,50.0,);<br>TSAKLKVEAV-(1045.625,51.0,);<br>TSEVKQLIK-(1045.625,42.0,)<br>STVLTSKYR-(1054.589,53.0,);<br>STVLTSKYR-(1054.589,64.0,)                                                                                                                                                                                                                                                                                                                           | C1;C2;N2    |
| 1045.6            | 12 | 6          |                                                           | GPPPPPPGKPKQ-(1068.584,44.0,);<br>GPPPPPPGKPKQ-(1068.584,46.0,);<br>GPPPPPPGKPKQ-(1068.584,46.0,)                                                                                                                                                                                                                                                                                                                                                                                 | C1;C2;N1    |
| 1054.6            | 14 | 5          | HBA_HUMAN                                                 | SESGIFTNTK-(1083.532,47.0,);<br>SESGIFTNTK-(1083.532,55.0,)                                                                                                                                                                                                                                                                                                                                                                                                                       | C1;N2       |
| 1068.6            | 5  | 5          | PRPC_HUMAN                                                |                                                                                                                                                                                                                                                                                                                                                                                                                                                                                   | N2          |
| 1083.5            | 0  | 3          | FIBA_HUMAN<br>FIBA_HUMAN,<br>PPM1A_HUMAN                  | VPDLVHVMR-Oxidation (M); Label:18O(2) (C-term)(1085.591,49.0,);<br>VPDLVHVMR-Oxidation (M); Label:18O(2) (C-term)(1085.591,52.0,);<br>VPDLVHVMR-Oxidation (M); Label:18O(2) (C-term)(1085.591,52.0,);<br>VPDLVHVMR-Oxidation (M); Label:18O(2) (C-term)(1085.591,57.0,);<br>VPDLVHVMR-Oxidation (M); Label:18O(2) (C-term)(1085.591,67.0,);<br>VPDLVHVMR-Oxidation (M); Label:18O(2) (C-term)(1085.591,71.0,);<br>VPDLVHVMR-Oxidation (M); Label:18O(2) (C-term)(1085.591,76.0,); | C1          |
| 1085.6            | 7  | 16         |                                                           |                                                                                                                                                                                                                                                                                                                                                                                                                                                                                   | C1;C2;N1;N2 |

|        |    |    |             |                                                                 |          |
|--------|----|----|-------------|-----------------------------------------------------------------|----------|
|        |    |    |             | VPDLVHVMR-Oxidation (M); Label:18O(2) (C-term)(1085.591,77.0,); |          |
|        |    |    |             | VPDLVHVMR-Oxidation (M); Label:18O(2) (C-term)(1085.591,78.0,); |          |
|        |    |    |             | VPDLVPGNFK-(1085.599,46.0,);                                    |          |
|        |    |    |             | VPDLVPGNFK-(1085.599,53.0,);                                    |          |
|        |    |    |             | VPDLVPGNFK-(1085.599,58.0,);                                    |          |
|        |    |    |             | VPDLVPGNFK-(1085.599,61.0,);                                    |          |
|        |    |    |             | VDEVGGEALGR-(1101.553,54.0,);                                   |          |
|        |    |    |             | VDEVGGEALGR-(1101.553,59.0,);                                   |          |
|        |    |    |             | VDEVGGEALGR-(1101.553,61.0,);                                   |          |
|        |    |    |             | VDEVGGEALGR-(1101.553,64.0,);                                   |          |
|        |    |    |             | VDEVGGEALGR-(1101.553,65.0,);                                   |          |
|        |    |    |             | VDEVGGEALGR-(1101.553,71.0,);                                   |          |
|        |    |    |             | VDEVGGEALGR-(1101.553,72.0,);                                   |          |
| 1101.6 | 10 | 11 | HBB_HUMAN   | VDEVGGEALGR-(1101.553,73.0,);                                   | C1;N2    |
|        |    |    |             | EVGGEALGRLL-(1113.626,49.0,);                                   |          |
|        |    |    |             | EVGGEALGRLL-(1113.626,49.0,);                                   |          |
| 1113.6 | 2  | 4  | HBB_HUMAN   | EVGGEALGRLL-(1113.626,52.0,)                                    | N2       |
|        |    |    |             | DELNNNVEAV-(1116.517,58.0,);                                    |          |
| 1116.5 | 14 | 4  | FIBB_HUMAN  | DELNNNVEAV-(1116.517,62.0,)                                     | C1;N1    |
|        |    |    |             | PPPPPPQPGF-Label:18O(2) (C-term)(1131.597,52.0,);               |          |
| 1131.6 | 22 | 5  | SET1B_HUMAN | PPPPPPQPGF-Label:18O(2) (C-term)(1131.597,52.0,)                | C1;N2    |
|        |    |    | H12_HUMAN,  | SLVSKGTLVQT-(1132.657,50.0,);                                   |          |
|        |    |    | H14_HUMAN   | SLVSKGTLVQT-(1132.657,50.0,);                                   |          |
| 1132.7 | 6  | 5  |             | SLVSKGTLVQT-(1132.657,51.0,)                                    | C1;N2    |
|        |    |    |             | GSESGIFTNTK-(1140.553,43.0,);                                   |          |
|        |    |    |             | GSESGIFTNTK-(1140.553,45.0,);                                   |          |
|        |    |    |             | GSESGIFTNTK-(1140.553,48.0,);                                   |          |
|        |    |    |             | GSESGIFTNTK-(1140.553,55.0,);                                   |          |
|        |    |    |             | GSESGIFTNTK-(1140.553,56.0,);                                   |          |
|        |    |    |             | GSESGIFTNTK-(1140.553,60.0,);                                   |          |
|        |    |    |             | GSESGIFTNTK-(1140.553,64.0,);                                   |          |
|        |    |    |             | GSESGIFTNTK-(1140.553,65.0,);                                   |          |
|        |    |    |             | GSESGIFTNTK-(1140.553,66.0,);                                   |          |
|        |    |    |             | GSESGIFTNTK-(1140.553,67.0,);                                   |          |
|        |    |    |             | GSESGIFTNTK-(1140.553,72.0,);                                   |          |
|        |    |    |             | GSESGIFTNTK-(1140.553,73.0,);                                   |          |
|        |    |    |             | GSESGIFTNTK-(1140.553,79.0,);                                   |          |
| 1140.6 | 0  | 15 | FIBA_HUMAN  | GSESGIFTNTK-(1140.553,80.0,)                                    | C1       |
|        |    |    |             | LVNEVTEFAK-(1149.615,43.0,);                                    |          |
|        |    |    |             | LVNEVTEFAK-(1149.615,44.0,);                                    |          |
|        |    |    |             | LVNEVTEFAK-(1149.615,49.0,);                                    |          |
|        |    |    |             | LVNEVTEFAK-(1149.615,51.0,);                                    |          |
|        |    |    |             | LVNEVTEFAK-(1149.615,52.0,);                                    |          |
|        |    |    |             | LVNEVTEFAK-(1149.615,53.0,);                                    |          |
|        |    |    |             | LVNEVTEFAK-(1149.615,54.0,);                                    |          |
|        |    |    |             | LVNEVTEFAK-(1149.615,55.0,);                                    |          |
|        |    |    |             | LVNEVTEFAK-(1149.615,60.0,);                                    |          |
| 1149.6 | 5  | 12 | ALBU_HUMAN  | LVNEVTEFAK-(1149.615,61.0,)                                     | C1;C2;N1 |
| 1149.7 | 7  | 3  | HBB_HUMAN   | VVAGVANALAHK-(1149.674,47.0,)                                   | C2;N2    |
|        |    |    | H12_HUMAN,  | GTGASGSFKLNK-(1166.616,53.0,);                                  |          |
|        |    |    | H14_HUMAN,  | GTGASGSFKLNK-(1166.616,53.0,);                                  |          |
|        |    |    | H15_HUMAN   | GTGASGSFKLNK-(1166.616,57.0,)                                   | C1;N2    |
| 1166.6 | 15 | 6  | CYC_HUMAN,  | PAPPPISGGGYR-(1168.611,54.0,);                                  |          |
|        |    |    | FIBB_HUMAN  | PAPPPISGGGYR-(1168.611,55.0,);                                  |          |
|        |    |    |             | PAPPPISGGGYR-(1168.611,59.0,);                                  |          |
|        |    |    |             | PAPPPISGGGYR-(1168.611,63.0,);                                  |          |
|        |    |    |             | PAPPPISGGGYR-(1168.611,64.0,);                                  |          |
|        |    |    |             | PAPPPISGGGYR-(1168.611,69.0,);                                  |          |
|        |    |    |             | RPAPPPISGGGY-(1168.611,49.0,);                                  |          |
|        |    |    |             | RPAPPPISGGGY-(1168.611,50.0,);                                  |          |
|        |    |    |             | RPAPPPISGGGY-(1168.611,53.0,);                                  |          |
|        |    |    |             | TGPNLHGLFGR-(1168.622,45.0,);                                   |          |
|        |    |    |             | TGPNLHGLFGR-(1168.622,63.0,);                                   |          |
|        |    |    |             | TGPNLHGLFGR-(1168.622,63.0,);                                   |          |
| 1168.6 | 5  | 15 |             | TGPNLHGLFGR-(1168.622,69.0,)                                    | C1;C2;N2 |
|        |    |    |             | VLSPADKTNVK-(1171.668,55.0,);                                   |          |
|        |    |    |             | VLSPADKTNVK-(1171.668,59.0,);                                   |          |
| 1171.7 | 18 | 7  | HBA_HUMAN   | VLSPADKTNVK-(1171.668,61.0,)                                    | C1;N2    |
| 1180.6 | 6  | 3  | HBB_HUMAN   | GVANALAHKYH-(1180.622,43.0,)                                    | C1;N2    |
| 1182.7 | 15 | 3  | FIBA_HUMAN  | KPVPDLVPGNF-(1182.652,48.0,)                                    | C1;N1    |
| 1188.6 | 12 | 4  | HBA_HUMAN   | FDLSHGSAQVK-(1188.601,48.0,)                                    | C1;N2    |

|        |    |    |                                                                                                                                            |                                                                                                                                                                                                                                                                                                                                                                                                                                                                                                                                                                                                                                                                                                                                                                                                                                                                                                                                                    |             |
|--------|----|----|--------------------------------------------------------------------------------------------------------------------------------------------|----------------------------------------------------------------------------------------------------------------------------------------------------------------------------------------------------------------------------------------------------------------------------------------------------------------------------------------------------------------------------------------------------------------------------------------------------------------------------------------------------------------------------------------------------------------------------------------------------------------------------------------------------------------------------------------------------------------------------------------------------------------------------------------------------------------------------------------------------------------------------------------------------------------------------------------------------|-------------|
|        |    |    |                                                                                                                                            | EGDFLAEGGGVR-(1206.575,44.0,);<br>EGDFLAEGGGVR-(1206.575,45.0,);<br>EGDFLAEGGGVR-(1206.575,50.0,);<br>EGDFLAEGGGVR-(1206.575,53.0,);<br>EGDFLAEGGGVR-(1206.575,54.0,);<br>EGDFLAEGGGVR-(1206.575,56.0,);<br>EGDFLAEGGGVR-(1206.575,57.0,);<br>EGDFLAEGGGVR-(1206.575,58.0,);<br>EGDFLAEGGGVR-(1206.575,60.0,);<br>EGDFLAEGGGVR-(1206.575,61.0,);<br>EGDFLAEGGGVR-(1206.575,62.0,);<br>EGDFLAEGGGVR-(1206.575,62.0,);<br>EGDFLAEGGGVR-(1206.575,65.0,);<br>EGDFLAEGGGVR-(1206.575,73.0,);<br>EGDFLAEGGGVR-(1206.575,78.0,);<br>EGDFLAEGGGVR-(1206.575,79.0,);<br>EGDFLAEGGGVR-(1206.575,80.0,);<br>EGDFLAEGGGVR-(1206.575,81.0,);<br>EGDFLAEGGGVR-(1206.575,84.0,);<br>EGDFLAEGGGVR-(1206.575,85.0,);<br>EGDFLAEGGGVR-(1206.575,86.0,);<br>EGDFLAEGGGVR-(1206.575,87.0,);<br>EGDFLAEGGGVR-(1206.575,89.0,);<br>EGDFLAEGGGVR-(1206.575,94.0,);<br>EGDFLAEGGGVR-(1206.575,95.0,);<br>EGDFLAEGGGVR-(1206.575,96.0,);<br>EGDFLAEGGGVR-(1206.575,97.0,); |             |
| 1206.6 | 2  | 29 | FIBA_HUMAN                                                                                                                                 | VHLTPEEKSAV-(1209.647,43.0,);<br>VHLTPEEKSAV-(1209.647,46.0,);<br>VHLTPEEKSAV-(1209.647,49.0,);<br>VHLTPEEKSAV-(1209.647,51.0,);<br>VHLTPEEKSAV-(1209.647,53.0,);<br>VHLTPEEKSAV-(1209.647,55.0,);<br>VHLTPEEKSAV-(1209.647,56.0,);<br>VHLTPEEKSAV-(1209.647,57.0,);<br>VHLTPEEKSAV-(1209.647,57.0,);<br>VHLTPEEKSAV-(1209.647,58.0,);<br>VHLTPEEKSAV-(1209.647,59.0,);<br>VHLTPEEKSAV-(1209.647,60.0,);<br>VHLTPEEKSAV-(1209.647,61.0,);<br>VHLTPEEKSAV-(1209.647,63.0,)                                                                                                                                                                                                                                                                                                                                                                                                                                                                          | C1;C2;N1;N2 |
| 1209.6 | 1  | 16 | HBB_HUMAN                                                                                                                                  | VHLTPEEKSAV-(1209.647,63.0,)                                                                                                                                                                                                                                                                                                                                                                                                                                                                                                                                                                                                                                                                                                                                                                                                                                                                                                                       | C1;N2       |
| 1214.6 | 17 | 5  | FIBA_HUMAN                                                                                                                                 | ELERPGGNEIT-(1214.601,50.0,)<br>VDELNNNVEAV-(1215.585,60.0,);<br>VDELNNNVEAV-(1215.585,61.0,);<br>VDELNNNVEAV-(1215.585,69.0,);<br>VDELNNNVEAV-(1215.585,70.0,)                                                                                                                                                                                                                                                                                                                                                                                                                                                                                                                                                                                                                                                                                                                                                                                    | C1          |
| 1215.6 | 17 | 7  | FIBB_HUMAN                                                                                                                                 | HVGDGNGVTADK-(1225.617,49.0,)                                                                                                                                                                                                                                                                                                                                                                                                                                                                                                                                                                                                                                                                                                                                                                                                                                                                                                                      | C1;N2       |
| 1225.6 | 12 | 4  | SODC_HUMAN                                                                                                                                 | FKDLGEENFK-(1226.605,54.0,)                                                                                                                                                                                                                                                                                                                                                                                                                                                                                                                                                                                                                                                                                                                                                                                                                                                                                                                        | C2;N2       |
| 1226.6 | 9  | 3  | ALBU_HUMAN<br>FIBA_HUMAN,<br>MCR_HUMAN                                                                                                     | FDTASTGKTFPG-(1228.584,51.0,);<br>FDTASTGKTFPG-(1228.584,60.0,);<br>FDTASTGKTFPG-(1228.584,65.0,);<br>FDTASTGKTFPG-(1228.584,74.0,);<br>FDTASTGKTFPG-(1228.584,75.0,);<br>PPPPPPQSPEEG-(1228.584,59.0,)                                                                                                                                                                                                                                                                                                                                                                                                                                                                                                                                                                                                                                                                                                                                            | C1;N1       |
| 1228.6 | 2  | 7  | CECR6_HUMAN,<br>DGKK_HUMAN,<br>HBB_HUMAN,<br>MAZ_HUMAN,<br>ONEC3_HUMAN<br>/<br>PO3F3_HUMAN,<br>PRR11_HUMAN,<br>SET1B_HUMAN,<br>SMR3B_HUMAN | DEVGGEALGRLL-(1228.653,45.0,);<br>DEVGGEALGRLL-(1228.653,52.0,);<br>DEVGGEALGRLL-(1228.653,53.0,);<br>DEVGGEALGRLL-(1228.653,63.0,);<br>DEVGGEALGRLL-(1228.653,67.0,);<br>PPPPPPAPPAPP-(1228.672,51.0,);<br>PPPPPPPPQPGF-Label:18O(2) (C-term)(1228.65,50.0,);<br>PPPPPPPPQPGF-Label:18O(2) (C-term)(1228.65,52.0,);<br>PPPPPPPYGPR-(1228.647,49.0,);<br>PPPPPPPYGPR-(1228.647,52.0,);<br>PPPPPPPYGPR-(1228.647,61.0,);<br>PPPPPPQGGSQLG-(1228.632,51.0,);<br>PPPPPPQGGSQLG-(1228.632,62.0,);<br>PPPPPPQGPVVK-Deamidated (NQ); Label:18O(1) (C-term)(1228.646,60.0,);<br>PPPPPPQRLAAS-Deamidated (NQ)(1228.668,46.0,);<br>PPPPPPQRLAAS-Deamidated (NQ)(1228.668,52.0,);<br>PPPPPPSPERVG-Label:18O(1) (C-term)(1228.657,52.0,);                                                                                                                                                                                                                     | C1;N1;N2    |
| 1228.7 | 8  | 19 |                                                                                                                                            |                                                                                                                                                                                                                                                                                                                                                                                                                                                                                                                                                                                                                                                                                                                                                                                                                                                                                                                                                    | C1;N2       |

|        |    |    |                                                         |                                                                                                                                                                                                                                                                                                                                                                                                                                                       |                |
|--------|----|----|---------------------------------------------------------|-------------------------------------------------------------------------------------------------------------------------------------------------------------------------------------------------------------------------------------------------------------------------------------------------------------------------------------------------------------------------------------------------------------------------------------------------------|----------------|
| 1228.7 | 0  | 1  | DOCK5_HUMAN                                             | PPPPPPVSAPAAE-Label:180(1) (C-term)(1228.646,51.0),<br>PPPPPPKARKSG-(1228.716,63.0),<br>SVSTVLTSKYR-(1240.69,48.0);<br>SVSTVLTSKYR-(1240.69,57.0);<br>SVSTVLTSKYR-(1240.69,59.0);<br>SVSTVLTSKYR-(1240.69,59.0);<br>SVSTVLTSKYR-(1240.69,59.0);<br>SVSTVLTSKYR-(1240.69,63.0);                                                                                                                                                                        | N2             |
| 1240.7 | 15 | 8  | HBA_HUMAN                                               | SVSTVLTSKYR-(1240.69,67.0)                                                                                                                                                                                                                                                                                                                                                                                                                            | C1;N2          |
| 1242.6 | 11 | 2  | ESPL1_HUMAN                                             | VLSKSMEAPSP-(1242.64,59.0),<br>LGEFVSETESR-(1253.601,50.0);<br>LGEFVSETESR-(1253.601,54.0)                                                                                                                                                                                                                                                                                                                                                            | C1;N2<br>C1    |
| 1253.6 | 18 | 4  | FIBA_HUMAN<br>H11_HUMAN,<br>H12_HUMAN,<br>H13_HUMAN     | SLVSKGTLVQTK-(1260.752,47.0);<br>SLVSKGTLVQTK-(1260.752,47.0);<br>SLVSKGTLVQTK-(1260.752,48.0);<br>SLVSKGTLVQTK-(1260.752,50.0);<br>SLVSKGTLVQTK-(1260.752,53.0);<br>SLVSKGTLVQTK-(1260.752,58.0);<br>SLVSKGTLVQTK-(1260.752,59.0);<br>SLVSKGTLVQTK-(1260.752,60.0);<br>SLVSKGTLVQTK-(1260.752,71.0);<br>SLVSKGTLVQTK-(1260.752,72.0);<br>SLVSKGTLVQTK-(1260.752,73.0)                                                                                | C1             |
| 1260.8 | 8  | 14 |                                                         | GEGDFLAEGGGVR-(1263.596,52.0);<br>GEGDFLAEGGGVR-(1263.596,55.0);<br>GEGDFLAEGGGVR-(1263.596,56.0);<br>GEGDFLAEGGGVR-(1263.596,60.0);<br>GEGDFLAEGGGVR-(1263.596,62.0);<br>GEGDFLAEGGGVR-(1263.596,64.0);<br>GEGDFLAEGGGVR-(1263.596,67.0);<br>GEGDFLAEGGGVR-(1263.596,73.0);<br>GEGDFLAEGGGVR-(1263.596,78.0);<br>GEGDFLAEGGGVR-(1263.596,79.0);<br>GEGDFLAEGGGVR-(1263.596,88.0);<br>GEGDFLAEGGGVR-(1263.596,94.0)                                   | C1;N1          |
| 1263.6 | 8  | 14 | FIBA_HUMAN<br>FATH_HUMAN,<br>NIBL_HUMAN,<br>TM164_HUMAN | QVLERVLKK-Deamidated (NQ)(1269.8,38.0);<br>SVVVLTLALLEI-(1269.803,38.0);<br>TLAVITAIGSPIN-(1269.741,53.0)                                                                                                                                                                                                                                                                                                                                             | C1;C2;N1       |
| 1269.8 | 18 | 6  |                                                         | KPVPDLVPGNFK-(1310.747,45.0);<br>KPVPDLVPGNFK-(1310.747,47.0);<br>KPVPDLVPGNFK-(1310.747,48.0);<br>KPVPDLVPGNFK-(1310.747,50.0);<br>KPVPDLVPGNFK-(1310.747,51.0);<br>KPVPDLVPGNFK-(1310.747,56.0);<br>KPVPDLVPGNFK-(1310.747,58.0);<br>KPVPDLVPGNFK-(1310.747,64.0);<br>KPVPDLVPGNFK-(1310.747,70.0);<br>KPVPDLVPGNFK-(1310.747,71.0)                                                                                                                 | C1;N1          |
| 1310.7 | 13 | 14 | FIBA_HUMAN                                              | GPGRIPPPPPAPY-(1315.716,56.0);<br>GPGRIPPPPPAPY-(1315.716,57.0);<br>GPGRIPPPPPAPY-(1315.716,58.0)                                                                                                                                                                                                                                                                                                                                                     | C1;N1;N2       |
| 1315.7 | 19 | 6  | SMR3B_HUMAN                                             | EILRGDFSSANN-(1322.633,51.0),<br>HFDLSHGSAQVK-(1325.66,51.0);<br>HFDLSHGSAQVK-(1325.66,53.0)                                                                                                                                                                                                                                                                                                                                                          | C1;C2;N2<br>N1 |
| 1322.6 | 0  | 2  | FIBA_HUMAN                                              | KASGPPVSELITK-(1326.763,41.0);<br>KASGPPVSELITK-(1326.763,47.0);<br>KASGPPVSELITK-(1326.763,48.0);<br>KASGPPVSELITK-(1326.763,52.0);<br>KASGPPVSELITK-(1326.763,59.0);<br>KASGPPVSELITK-(1326.763,60.0);<br>KASGPPVSELITK-(1326.763,61.0);<br>KASGPPVSELITK-(1326.763,62.0);<br>KASGPPVSELITK-(1326.763,63.0);<br>KASGPPVSELITK-(1326.763,66.0);<br>KASGPPVSELITK-(1326.763,67.0);<br>KASGPPVSELITK-(1326.763,72.0);<br>KASGPPVSELITK-(1326.763,73.0) | C1;N2          |
| 1325.7 | 10 | 5  | HBA_HUMAN<br>H12_HUMAN,<br>H14_HUMAN                    | VPPPPPPYGPGR-(1327.716,56.0);<br>VPPPPPPYGPGR-(1327.716,57.0);<br>VPPPPPPYGPGR-(1327.716,60.0)                                                                                                                                                                                                                                                                                                                                                        | C1;N2          |
| 1326.8 | 8  | 17 |                                                         | SQLQKVPPEWK-(1339.737,42.0);<br>SQLQKVPPEWK-(1339.737,48.0)                                                                                                                                                                                                                                                                                                                                                                                           | C1;N2          |
| 1327.7 | 5  | 5  | SMR3B_HUMAN                                             | KATGPPVSELITK-(1340.778,53.0);<br>KATGPPVSELITK-(1340.778,55.0)                                                                                                                                                                                                                                                                                                                                                                                       | C1;N2          |
| 1339.7 | 1  | 3  | FIBA_HUMAN                                              |                                                                                                                                                                                                                                                                                                                                                                                                                                                       | C1             |
| 1340.8 | 3  | 10 | H15_HUMAN                                               |                                                                                                                                                                                                                                                                                                                                                                                                                                                       | C1             |

|         |    |    |                                       |                                                                                                                                                                                                                                                                                                                                                                                                                                                                                                                                                                                                                                                                                                                                                                                                                                                                                                                                                                                                                                                                                                                                                                                                                                                                                                                |             |
|---------|----|----|---------------------------------------|----------------------------------------------------------------------------------------------------------------------------------------------------------------------------------------------------------------------------------------------------------------------------------------------------------------------------------------------------------------------------------------------------------------------------------------------------------------------------------------------------------------------------------------------------------------------------------------------------------------------------------------------------------------------------------------------------------------------------------------------------------------------------------------------------------------------------------------------------------------------------------------------------------------------------------------------------------------------------------------------------------------------------------------------------------------------------------------------------------------------------------------------------------------------------------------------------------------------------------------------------------------------------------------------------------------|-------------|
| 1342.6  | 15 | 7  | ALBU_HUMAN                            | KATGPPVSELITK-(1340.778,59.0,);<br>KATGPPVSELITK-(1340.778,60.0,);<br>KATGPPVSELITK-(1340.778,74.0,);<br>KATGPPVSELITK-(1340.778,75.0,);<br>KATGPPVSELITK-(1340.778,80.0,);<br>KATGPPVSELITK-(1340.778,81.0,);<br>AVMDDFAAFVEK-(1342.635,52.0,);<br>AVMDDFAAFVEK-(1342.635,58.0,);<br>AVMDDFAAFVEK-(1342.635,59.0,);<br>AVMDDFAAFVEK-(1342.635,60.0,);<br>ILRGDFSSANNR-(1349.692,52.0,);<br>ILRGDFSSANNR-(1349.692,54.0,);                                                                                                                                                                                                                                                                                                                                                                                                                                                                                                                                                                                                                                                                                                                                                                                                                                                                                     | C1;N1;N2    |
| 1349.7  | 0  | 4  | FIBA_HUMAN                            | ILRGDFSSANNR-(1349.692,56.0,);<br>SGEGDFLAEGGGVR-(1350.628,100.0,);<br>SGEGDFLAEGGGVR-(1350.628,103.0,);<br>SGEGDFLAEGGGVR-(1350.628,105.0,);<br>SGEGDFLAEGGGVR-(1350.628,106.0,);<br>SGEGDFLAEGGGVR-(1350.628,115.0,);<br>SGEGDFLAEGGGVR-(1350.628,116.0,);<br>SGEGDFLAEGGGVR-(1350.628,126.0,);<br>SGEGDFLAEGGGVR-(1350.628,127.0,);<br>SGEGDFLAEGGGVR-(1350.628,47.0,);<br>SGEGDFLAEGGGVR-(1350.628,50.0,);<br>SGEGDFLAEGGGVR-(1350.628,55.0,);<br>SGEGDFLAEGGGVR-(1350.628,56.0,);<br>SGEGDFLAEGGGVR-(1350.628,59.0,);<br>SGEGDFLAEGGGVR-(1350.628,62.0,);<br>SGEGDFLAEGGGVR-(1350.628,63.0,);<br>SGEGDFLAEGGGVR-(1350.628,68.0,);<br>SGEGDFLAEGGGVR-(1350.628,69.0,);<br>SGEGDFLAEGGGVR-(1350.628,70.0,);<br>SGEGDFLAEGGGVR-(1350.628,71.0,);<br>SGEGDFLAEGGGVR-(1350.628,73.0,);<br>SGEGDFLAEGGGVR-(1350.628,74.0,);<br>SGEGDFLAEGGGVR-(1350.628,75.0,);<br>SGEGDFLAEGGGVR-(1350.628,76.0,);<br>SGEGDFLAEGGGVR-(1350.628,77.0,);<br>SGEGDFLAEGGGVR-(1350.628,82.0,);<br>SGEGDFLAEGGGVR-(1350.628,85.0,);<br>SGEGDFLAEGGGVR-(1350.628,87.0,);<br>SGEGDFLAEGGGVR-(1350.628,88.0,);<br>SGEGDFLAEGGGVR-(1350.628,90.0,);<br>SGEGDFLAEGGGVR-(1350.628,91.0,);<br>SGEGDFLAEGGGVR-(1350.628,93.0,);<br>SGEGDFLAEGGGVR-(1350.628,94.0,);<br>SGEGDFLAEGGGVR-(1350.628,96.0,);<br>SGEGDFLAEGGGVR-(1350.628,97.0,); | N1          |
| 1350.6  | 5  | 36 | FIBA_HUMAN<br>HBB_HUMAN,<br>HBD_HUMAN | VAGVANALAHKYH-(1350.728,49.0,);<br>VAGVANALAHKYH-(1350.728,49.0,);<br>VAGVANALAHKYH-(1350.728,50.0,);<br>VAGVANALAHKYH-(1350.728,51.0,);<br>VAGVANALAHKYH-(1350.728,85.0,);<br>VAGVANALAHKYH-(1350.728,86.0,);<br>VAGVANALAHKYH-(1350.728,92.0,);                                                                                                                                                                                                                                                                                                                                                                                                                                                                                                                                                                                                                                                                                                                                                                                                                                                                                                                                                                                                                                                              | C1;C2;N1;N2 |
| 1350.7  | 3  | 9  |                                       | GSESGIFTNTKES-(1356.628,53.0,);<br>GSESGIFTNTKES-(1356.628,57.0,);<br>GSESGIFTNTKES-(1356.628,58.0,);<br>GSESGIFTNTKES-(1356.628,78.0,);<br>GSESGIFTNTKES-(1356.628,79.0,);<br>GSESGIFTNTKES-(1356.628,80.0,);                                                                                                                                                                                                                                                                                                                                                                                                                                                                                                                                                                                                                                                                                                                                                                                                                                                                                                                                                                                                                                                                                                 | C1;N2       |
| 1356.6  | 1  | 7  | FIBA_HUMAN                            |                                                                                                                                                                                                                                                                                                                                                                                                                                                                                                                                                                                                                                                                                                                                                                                                                                                                                                                                                                                                                                                                                                                                                                                                                                                                                                                | C1          |
| 1357.72 | 2  | 8  | Q75MM1                                | KKKHPDASVNFS-(1357.722,19.0,);<br>AVMDDFAAFVEK-Oxidation (M)(1358.63,50.0,);<br>AVMDDFAAFVEK-Oxidation (M)(1358.63,51.0,);<br>AVMDDFAAFVEK-Oxidation (M)(1358.63,54.0,);<br>AVMDDFAAFVEK-Oxidation (M)(1358.63,55.0,);<br>AVMDDFAAFVEK-Oxidation (M)(1358.63,56.0,);<br>AVMDDFAAFVEK-Oxidation (M)(1358.63,57.0,);<br>AVMDDFAAFVEK-Oxidation (M)(1358.63,60.0,);<br>AVMDDFAAFVEK-Oxidation (M)(1358.63,61.0,);<br>AVMDDFAAFVEK-Oxidation (M)(1358.63,63.0,);<br>AVMDDFAAFVEK-Oxidation (M)(1358.63,64.0,);<br>AVMDDFAAFVEK-Oxidation (M)(1358.63,66.0,);                                                                                                                                                                                                                                                                                                                                                                                                                                                                                                                                                                                                                                                                                                                                                       | C1          |
| 1358.6  | 7  | 17 | ALBU_HUMAN                            |                                                                                                                                                                                                                                                                                                                                                                                                                                                                                                                                                                                                                                                                                                                                                                                                                                                                                                                                                                                                                                                                                                                                                                                                                                                                                                                | C1;C2;N1;N2 |

|        |    |    |                                                                    |                                                                                                                                                                                                                                                                                                                                                                                                                                                                                                                                                                                                                                                                                                                                                                       |             |
|--------|----|----|--------------------------------------------------------------------|-----------------------------------------------------------------------------------------------------------------------------------------------------------------------------------------------------------------------------------------------------------------------------------------------------------------------------------------------------------------------------------------------------------------------------------------------------------------------------------------------------------------------------------------------------------------------------------------------------------------------------------------------------------------------------------------------------------------------------------------------------------------------|-------------|
|        |    |    |                                                                    | AVMDDFAAFVEK-Oxidation (M)(1358.63,68.0,);<br>AVMDDFAAFVEK-Oxidation (M)(1358.63,69.0,);<br>AVMDDFAAFVEK-Oxidation (M)(1358.63,75.0,);<br>AVMDDFAAFVEK-Oxidation (M)(1358.63,77.0,);<br>IGGGLSSVGGGSSTIK-(1376.738,50.0,);<br>IGGGLSSVGGGSSTIK-(1376.738,51.0,);<br>IGGGLSSVGGGSSTIK-(1376.738,59.0,);<br>IGGGLSSVGGGSSTIK-(1376.738,64.0,)                                                                                                                                                                                                                                                                                                                                                                                                                           |             |
| 1376.7 | 3  | 6  | K2C6A_HUMAN                                                        | DYVSQFEGSALGK-(1400.669,64.0,);<br>DYVSQFEGSALGK-(1400.669,65.0,);<br>DYVSQFEGSALGK-(1400.669,73.0,)                                                                                                                                                                                                                                                                                                                                                                                                                                                                                                                                                                                                                                                                  | C1;C2       |
| 1400.7 | 12 | 5  | APOA1_HUMAN<br>H11_HUMAN,<br>H12_HUMAN,<br>H14_HUMAN,<br>H15_HUMAN | GTLVQTKGTGASGSF-(1410.722,54.0,);<br>GTLVQTKGTGASGSF-(1410.722,57.0,);<br>GTLVQTKGTGASGSF-(1410.722,60.0,);<br>GTLVQTKGTGASGSF-(1410.722,66.0,);<br>GTLVQTKGTGASGSF-(1410.722,67.0,);<br>GTLVQTKGTGASGSF-(1410.722,70.0,);<br>GTLVQTKGTGASGSF-(1410.722,71.0,);<br>GTLVQTKGTGASGSF-(1410.722,71.0,);<br>GTLVQTKGTGASGSF-(1410.722,72.0,)                                                                                                                                                                                                                                                                                                                                                                                                                              | C1;N2       |
| 1410.7 | 2  | 10 |                                                                    | NSVDELNNNVEAV-(1416.66,52.0,);<br>NSVDELNNNVEAV-(1416.66,56.0,)                                                                                                                                                                                                                                                                                                                                                                                                                                                                                                                                                                                                                                                                                                       | C1          |
| 1416.7 | 2  | 3  | FIBB_HUMAN                                                         | PGSTGTWNPSSER-(1432.645,51.0,);<br>PGSTGTWNPSSER-(1432.645,54.0,);<br>PGSTGTWNPSSER-(1432.645,64.0,);<br>PGSTGTWNPSSER-(1432.645,65.0,);<br>PGSTGTWNPSSER-(1432.645,68.0,)                                                                                                                                                                                                                                                                                                                                                                                                                                                                                                                                                                                            | C1          |
| 1432.6 | 1  | 6  | FIBA_HUMAN                                                         | ALEEYTKKLNTQ-(1437.758,54.0,);<br>ALEEYTKKLNTQ-(1437.758,56.0,)                                                                                                                                                                                                                                                                                                                                                                                                                                                                                                                                                                                                                                                                                                       | C1          |
| 1437.8 | 9  | 7  | APOA1_HUMAN<br>K2C6A_HUMAN,<br>K2C6C_HUMAN,<br>K2C6D_HUMAN         | AIGGGLSSVGGGSSTIK-(1447.775,45.0,);<br>AIGGGLSSVGGGSSTIK-(1447.775,48.0,);<br>AIGGGLSSVGGGSSTIK-(1447.775,51.0,);<br>AIGGGLSSVGGGSSTIK-(1447.775,54.0,);<br>AIGGGLSSVGGGSSTIK-(1447.775,56.0,);<br>AIGGGLSSVGGGSSTIK-(1447.775,59.0,);<br>AIGGGLSSVGGGSSTIK-(1447.775,66.0,);<br>AIGGGLSSVGGGSSTIK-(1447.775,67.0,);<br>AIGGGLSSVGGGSSTIK-(1447.775,68.0,);<br>AIGGGLSSVGGGSSTIK-(1447.775,69.0,);<br>AIGGGLSSVGGGSSTIK-(1447.775,72.0,);<br>AIGGGLSSVGGGSSTIK-(1447.775,73.0,);<br>AIGGGLSSVGGGSSTIK-(1447.775,95.0,);<br>AIGGGLSSVGGGSSTIK-(1447.775,96.0,)                                                                                                                                                                                                         | C1;N2       |
| 1447.8 | 6  | 18 | HBB_HUMAN,<br>HBD_HUMAN                                            | VVAGVANALAHKYH-(1449.796,70.0,);<br>VVAGVANALAHKYH-(1449.796,77.0,);<br>VVAGVANALAHKYH-(1449.796,79.0,);<br>VVAGVANALAHKYH-(1449.796,79.0,)                                                                                                                                                                                                                                                                                                                                                                                                                                                                                                                                                                                                                           | C1;C2       |
| 1449.8 | 4  | 7  |                                                                    | MKPVPDLVPGNFK-Oxidation (M)(1457.782,48.0,);<br>MKPVPDLVPGNFK-Oxidation (M)(1457.782,49.0,);<br>MKPVPDLVPGNFK-Oxidation (M)(1457.782,53.0,);<br>MKPVPDLVPGNFK-Oxidation (M)(1457.782,56.0,);<br>MKPVPDLVPGNFK-Oxidation (M)(1457.782,58.0,);<br>MKPVPDLVPGNFK-Oxidation (M)(1457.782,59.0,)                                                                                                                                                                                                                                                                                                                                                                                                                                                                           | C1;N2       |
| 1457.8 | 15 | 9  | FIBA_HUMAN                                                         | DSGEGDFLAEGGGVR-(1465.655,101.0,);<br>DSGEGDFLAEGGGVR-(1465.655,102.0,);<br>DSGEGDFLAEGGGVR-(1465.655,103.0,);<br>DSGEGDFLAEGGGVR-(1465.655,104.0,);<br>DSGEGDFLAEGGGVR-(1465.655,112.0,);<br>DSGEGDFLAEGGGVR-(1465.655,121.0,);<br>DSGEGDFLAEGGGVR-(1465.655,45.0,);<br>DSGEGDFLAEGGGVR-(1465.655,46.0,);<br>DSGEGDFLAEGGGVR-(1465.655,47.0,);<br>DSGEGDFLAEGGGVR-(1465.655,51.0,);<br>DSGEGDFLAEGGGVR-(1465.655,51.0,);<br>DSGEGDFLAEGGGVR-(1465.655,53.0,);<br>DSGEGDFLAEGGGVR-(1465.655,61.0,);<br>DSGEGDFLAEGGGVR-(1465.655,64.0,);<br>DSGEGDFLAEGGGVR-(1465.655,66.0,);<br>DSGEGDFLAEGGGVR-(1465.655,71.0,);<br>DSGEGDFLAEGGGVR-(1465.655,72.0,);<br>DSGEGDFLAEGGGVR-(1465.655,78.0,);<br>DSGEGDFLAEGGGVR-(1465.655,79.0,);<br>DSGEGDFLAEGGGVR-(1465.655,84.0,) | C1;N1;N2    |
| 1465.7 | 0  | 36 | FIBA_HUMAN                                                         |                                                                                                                                                                                                                                                                                                                                                                                                                                                                                                                                                                                                                                                                                                                                                                       | C1;C2;N1;N2 |

|        |    |    |             |                                                               |             |
|--------|----|----|-------------|---------------------------------------------------------------|-------------|
|        |    |    |             | DSGEGDFLAEGGGVR-(1465.655,85.0,);                             |             |
|        |    |    |             | DSGEGDFLAEGGGVR-(1465.655,86.0,);                             |             |
|        |    |    |             | DSGEGDFLAEGGGVR-(1465.655,87.0,);                             |             |
|        |    |    |             | DSGEGDFLAEGGGVR-(1465.655,88.0,);                             |             |
|        |    |    |             | DSGEGDFLAEGGGVR-(1465.655,89.0,);                             |             |
|        |    |    |             | DSGEGDFLAEGGGVR-(1465.655,90.0,);                             |             |
|        |    |    |             | DSGEGDFLAEGGGVR-(1465.655,91.0,);                             |             |
|        |    |    |             | DSGEGDFLAEGGGVR-(1465.655,92.0,);                             |             |
|        |    |    |             | DSGEGDFLAEGGGVR-(1465.655,93.0,);                             |             |
|        |    |    |             | DSGEGDFLAEGGGVR-(1465.655,94.0,);                             |             |
|        |    |    |             | DSGEGDFLAEGGGVR-(1465.655,95.0,);                             |             |
|        |    |    |             | DSGEGDFLAEGGGVR-(1465.655,96.0,);                             |             |
|        |    |    |             | DSGEGDFLAEGGGVR-(1465.655,97.0,);                             |             |
|        |    |    |             | DSGEGDFLAEGGGVR-(1465.655,98.0,);                             |             |
|        |    |    |             | DSGEGDFLAEGGGVR-(1465.655,99.0,)                              |             |
|        |    |    |             | RHPDYSVLLLLR-(1467.843,40.0,);                                |             |
|        |    |    |             | RHPDYSVLLLLR-(1467.843,47.0,);                                |             |
|        |    |    |             | RHPDYSVLLLLR-(1467.843,48.0,);                                |             |
|        |    |    |             | RHPDYSVLLLLR-(1467.843,49.0,);                                |             |
|        |    |    |             | RHPDYSVLLLLR-(1467.843,50.0,);                                |             |
|        |    |    |             | RHPDYSVLLLLR-(1467.843,51.0,);                                |             |
|        |    |    |             | RHPDYSVLLLLR-(1467.843,52.0,);                                |             |
|        |    |    |             | RHPDYSVLLLLR-(1467.843,53.0,);                                |             |
|        |    |    |             | RHPDYSVLLLLR-(1467.843,54.0,);                                |             |
|        |    |    |             | RHPDYSVLLLLR-(1467.843,55.0,);                                |             |
|        |    |    |             | RHPDYSVLLLLR-(1467.843,57.0,);                                |             |
|        |    |    |             | RHPDYSVLLLLR-(1467.843,58.0,);                                |             |
|        |    |    |             | RHPDYSVLLLLR-(1467.843,59.0,);                                |             |
|        |    |    |             | RHPDYSVLLLLR-(1467.843,61.0,);                                |             |
|        |    |    |             | RHPDYSVLLLLR-(1467.843,63.0,);                                |             |
|        |    |    |             | RHPDYSVLLLLR-(1467.843,64.0,);                                |             |
|        |    |    |             | RHPDYSVLLLLR-(1467.843,66.0,);                                |             |
|        |    |    |             | RHPDYSVLLLLR-(1467.843,68.0,);                                |             |
| 1467.8 | 2  | 22 | ALBU_HUMAN  | RHPDYSVLLLLR-(1467.843,69.0,)                                 | C1;C2;N1;N2 |
|        |    |    |             | EILRGDFSSANNR-(1478.735,51.0,);                               |             |
| 1478.7 | 0  | 3  | FIBA_HUMAN  | EILRGDFSSANNR-(1478.735,53.0,)                                | C1;N1;N2    |
|        |    |    |             | TYNPDESSKPNMI-Oxidation (M)(1511.668,65.0,);                  |             |
| 1511.7 | 1  | 3  | FIBG_HUMAN  | TYNPDESSKPNMI-Oxidation (M)(1511.668,66.0,)                   | C1          |
| 1517.7 | 6  | 4  | FIBA_HUMAN  | MELERPGGNEITR-Oxidation (M)(1517.738,60.0,)                   | C1          |
|        |    |    |             | MELERPGGNEITR-Deamidated (NQ); Oxidation (M)(1518.722,52.0,); |             |
|        |    |    |             | MELERPGGNEITR-Deamidated (NQ); Oxidation (M)(1518.722,54.0,); |             |
|        |    |    |             | MELERPGGNEITR-Deamidated (NQ); Oxidation (M)(1518.722,59.0,); |             |
|        |    |    |             | MELERPGGNEITR-Deamidated (NQ); Oxidation (M)(1518.722,61.0,); |             |
|        |    |    |             | MELERPGGNEITR-Deamidated (NQ); Oxidation (M)(1518.722,62.0,)  |             |
| 1518.7 | 3  | 7  | FIBA_HUMAN  | DLGTLSGIGTLDGFR-(1521.791,46.0,);                             | C1          |
|        |    |    |             | DLGTLSGIGTLDGFR-(1521.791,53.0,);                             |             |
|        |    |    |             | DLGTLSGIGTLDGFR-(1521.791,67.0,);                             |             |
|        |    |    |             | DLGTLSGIGTLDGFR-(1521.791,68.0,);                             |             |
|        |    |    |             | DLGTLSGIGTLDGFR-(1521.791,71.0,);                             |             |
|        |    |    |             | DLGTLSGIGTLDGFR-(1521.791,72.0,);                             |             |
|        |    |    |             | DLGTLSGIGTLDGFR-(1521.791,75.0,);                             |             |
| 1521.8 | 0  | 9  | FIBA_HUMAN  | DLGTLSGIGTLDGFR-(1521.791,76.0,)                              | C1          |
|        |    |    |             | SALEEYTKKLNTQ-(1524.79,50.0,);                                |             |
|        |    |    |             | SALEEYTKKLNTQ-(1524.79,52.0,);                                |             |
|        |    |    |             | SALEEYTKKLNTQ-(1524.79,58.0,);                                |             |
| 1524.8 | 14 | 6  | APOA1_HUMAN | SALEEYTKKLNTQ-(1524.79,58.0,)                                 | C1;C2;N2    |
|        |    |    |             | VGAHAGEYGAEALER-(1529.734,52.0,);                             |             |
|        |    |    |             | VGAHAGEYGAEALER-(1529.734,53.0,);                             |             |
|        |    |    |             | VGAHAGEYGAEALER-(1529.734,57.0,);                             |             |
|        |    |    |             | VGAHAGEYGAEALER-(1529.734,59.0,);                             |             |
|        |    |    |             | VGAHAGEYGAEALER-(1529.734,64.0,);                             |             |
|        |    |    |             | VGAHAGEYGAEALER-(1529.734,68.0,);                             |             |
| 1529.7 | 9  | 10 | HBA_HUMAN   | VGAHAGEYGAEALER-(1529.734,69.0,)                              | C2;N2       |
|        |    |    |             | ADSGEGDFLAEGGGVR-(1536.693,100.0,);                           |             |
|        |    |    |             | ADSGEGDFLAEGGGVR-(1536.693,102.0,);                           |             |
|        |    |    |             | ADSGEGDFLAEGGGVR-(1536.693,103.0,);                           |             |
|        |    |    |             | ADSGEGDFLAEGGGVR-(1536.693,105.0,);                           |             |
| 1536.7 | 0  | 33 | FIBA_HUMAN  | ADSGEGDFLAEGGGVR-(1536.693,106.0,);                           | C1;C2;N1;N2 |

|        |   |    |                                         |                                                                                                                                                                                                                                                                                                                                                                                                                                                                                                                                                                                                                                                                                                                                                                                                                                                                                                                                                                                                                                                                         |          |
|--------|---|----|-----------------------------------------|-------------------------------------------------------------------------------------------------------------------------------------------------------------------------------------------------------------------------------------------------------------------------------------------------------------------------------------------------------------------------------------------------------------------------------------------------------------------------------------------------------------------------------------------------------------------------------------------------------------------------------------------------------------------------------------------------------------------------------------------------------------------------------------------------------------------------------------------------------------------------------------------------------------------------------------------------------------------------------------------------------------------------------------------------------------------------|----------|
|        |   |    |                                         | ADSGEGDFLAEGGGVR-(1536.693,107.0,);<br>ADSGEGDFLAEGGGVR-(1536.693,107.0,);<br>ADSGEGDFLAEGGGVR-(1536.693,108.0,);<br>ADSGEGDFLAEGGGVR-(1536.693,109.0,);<br>ADSGEGDFLAEGGGVR-(1536.693,110.0,);<br>ADSGEGDFLAEGGGVR-(1536.693,112.0,);<br>ADSGEGDFLAEGGGVR-(1536.693,113.0,);<br>ADSGEGDFLAEGGGVR-(1536.693,116.0,);<br>ADSGEGDFLAEGGGVR-(1536.693,119.0,);<br>ADSGEGDFLAEGGGVR-(1536.693,120.0,);<br>ADSGEGDFLAEGGGVR-(1536.693,44.0,);<br>ADSGEGDFLAEGGGVR-(1536.693,45.0,);<br>ADSGEGDFLAEGGGVR-(1536.693,46.0,);<br>ADSGEGDFLAEGGGVR-(1536.693,57.0,);<br>ADSGEGDFLAEGGGVR-(1536.693,59.0,);<br>ADSGEGDFLAEGGGVR-(1536.693,64.0,);<br>ADSGEGDFLAEGGGVR-(1536.693,69.0,);<br>ADSGEGDFLAEGGGVR-(1536.693,70.0,);<br>ADSGEGDFLAEGGGVR-(1536.693,73.0,);<br>ADSGEGDFLAEGGGVR-(1536.693,81.0,);<br>ADSGEGDFLAEGGGVR-(1536.693,91.0,);<br>ADSGEGDFLAEGGGVR-(1536.693,92.0,);<br>ADSGEGDFLAEGGGVR-(1536.693,93.0,);<br>ADSGEGDFLAEGGGVR-(1536.693,94.0,);<br>ADSGEGDFLAEGGGVR-(1536.693,96.0,);<br>ADSGEGDFLAEGGGVR-(1536.693,98.0,);<br>ADSGEGDFLAEGGGVR-(1536.693,99.0,) |          |
| 1544.7 | 4 | 4  | FIBB_HUMAN                              | SQTSSSSSFQYMYL-Oxidation (M)(1544.657,60.0,);<br>SQTSSSSSFQYMYL-Oxidation (M)(1544.657,61.0,)                                                                                                                                                                                                                                                                                                                                                                                                                                                                                                                                                                                                                                                                                                                                                                                                                                                                                                                                                                           | N1;N2    |
|        |   |    |                                         | GYGYGPYQPVPEQP-(1551.711,47.0,);<br>GYGYGPYQPVPEQP-(1551.711,54.0,);<br>GYGYGPYQPVPEQP-(1551.711,59.0,);<br>GYGYGPYQPVPEQP-(1551.711,64.0,);<br>GYGYGPYQPVPEQP-(1551.711,65.0,)                                                                                                                                                                                                                                                                                                                                                                                                                                                                                                                                                                                                                                                                                                                                                                                                                                                                                         |          |
| 1551.7 | 4 | 7  | STAT_HUMAN                              | QGVNDNEEGFFSAR-Gln->pyro-Glu (N-term Q)(1552.666,102.0,);<br>QGVNDNEEGFFSAR-Gln->pyro-Glu (N-term Q)(1552.666,57.0,);<br>QGVNDNEEGFFSAR-Gln->pyro-Glu (N-term Q)(1552.666,62.0,);<br>QGVNDNEEGFFSAR-Gln->pyro-Glu (N-term Q)(1552.666,67.0,);<br>QGVNDNEEGFFSAR-Gln->pyro-Glu (N-term Q)(1552.666,68.0,);<br>QGVNDNEEGFFSAR-Gln->pyro-Glu (N-term Q)(1552.666,69.0,);<br>QGVNDNEEGFFSAR-Gln->pyro-Glu (N-term Q)(1552.666,72.0,);<br>QGVNDNEEGFFSAR-Gln->pyro-Glu (N-term Q)(1552.666,73.0,);<br>QGVNDNEEGFFSAR-Gln->pyro-Glu (N-term Q)(1552.666,74.0,);<br>QGVNDNEEGFFSAR-Gln->pyro-Glu (N-term Q)(1552.666,79.0,);<br>QGVNDNEEGFFSAR-Gln->pyro-Glu (N-term Q)(1552.666,87.0,);                                                                                                                                                                                                                                                                                                                                                                                       | N2       |
| 1552.7 | 4 | 14 | FIBB_HUMAN<br>ACTB_HUMAN,<br>ACTG_HUMAN | QGVNDNEEGFFSAR-Gln->pyro-Glu (N-term Q)(1552.666,92.0,);<br>VLSGGTTMYPGIADR-Oxidation (M)(1553.763,61.0,);<br>VLSGGTTMYPGIADR-Oxidation (M)(1553.763,62.0,);<br>VLSGGTTMYPGIADR-Oxidation (M)(1553.763,67.0,);<br>VLSGGTTMYPGIADR-Oxidation (M)(1553.763,68.0,);<br>VLSGGTTMYPGIADR-Oxidation (M)(1553.763,69.0,);<br>VLSGGTTMYPGIADR-Oxidation (M)(1553.763,71.0,);<br>VLSGGTTMYPGIADR-Oxidation (M)(1553.763,73.0,);<br>VLSGGTTMYPGIADR-Oxidation (M)(1553.763,74.0,);<br>VLSGGTTMYPGIADR-Oxidation (M)(1553.763,80.0,);<br>VLSGGTTMYPGIADR-Oxidation (M)(1553.763,84.0,)                                                                                                                                                                                                                                                                                                                                                                                                                                                                                             | C1;N1;N2 |
| 1553.8 | 1 | 11 |                                         |                                                                                                                                                                                                                                                                                                                                                                                                                                                                                                                                                                                                                                                                                                                                                                                                                                                                                                                                                                                                                                                                         | C1       |
| 1558.8 | 2 | 3  | HBB_HUMAN                               | SDGLAHLNLIKGTFA-(1558.786,54.0,)<br>TATSEYQTFNPR-(1561.728,47.0,);<br>TATSEYQTFNPR-(1561.728,53.0,);<br>TATSEYQTFNPR-(1561.728,62.0,);                                                                                                                                                                                                                                                                                                                                                                                                                                                                                                                                                                                                                                                                                                                                                                                                                                                                                                                                  | C1       |
| 1561.7 | 1 | 5  | THRB_HUMAN                              | TATSEYQTFNPR-(1561.728,63.0,)                                                                                                                                                                                                                                                                                                                                                                                                                                                                                                                                                                                                                                                                                                                                                                                                                                                                                                                                                                                                                                           | N1;N2    |
| 1572.8 | 7 | 7  | FIBB_HUMAN                              | RNSVDELNNNVEAV-(1572.761,60.0,);                                                                                                                                                                                                                                                                                                                                                                                                                                                                                                                                                                                                                                                                                                                                                                                                                                                                                                                                                                                                                                        | C1;N2    |



|        |   |    |                            |                                                                                                                                                                                                                                                                                                                                                                                                                                                                                                                                                                                                                                                                                                                                                                 |             |
|--------|---|----|----------------------------|-----------------------------------------------------------------------------------------------------------------------------------------------------------------------------------------------------------------------------------------------------------------------------------------------------------------------------------------------------------------------------------------------------------------------------------------------------------------------------------------------------------------------------------------------------------------------------------------------------------------------------------------------------------------------------------------------------------------------------------------------------------------|-------------|
| 1577.8 | 1 | 3  | A26CA_HUMAN,<br>ACTB_HUMAN | RNSVDELNNNVEAV-(1572.761,62.0,);<br>RNSVDELNNNVEAV-(1572.761,64.0,);<br>RNSVDELNNNVEAV-(1572.761,65.0,)<br>SLEKSYELPDGQVI-(1577.806,54.0,);<br>SLEKSYELPDGQVI-(1577.806,54.0,)<br>HPDEAAFFDTASTGK-(1593.718,50.0,);<br>HPDEAAFFDTASTGK-(1593.718,54.0,);<br>HPDEAAFFDTASTGK-(1593.718,60.0,);<br>HPDEAAFFDTASTGK-(1593.718,64.0,);<br>HPDEAAFFDTASTGK-(1593.718,69.0,);<br>HPDEAAFFDTASTGK-(1593.718,70.0,)                                                                                                                                                                                                                                                                                                                                                     | C1          |
| 1593.7 | 1 | 7  | FIBA_HUMAN                 | QLTYNPDESSKPNM-Oxidation (M); Gln->pyro-Glu (N-term Q)(1622.7,57.0,);<br>QLTYNPDESSKPNM-Oxidation (M); Gln->pyro-Glu (N-term Q)(1622.7,60.0,);<br>QLTYNPDESSKPNM-Oxidation (M); Gln->pyro-Glu (N-term Q)(1622.7,73.0,);<br>QLTYNPDESSKPNM-Oxidation (M); Gln->pyro-Glu (N-term Q)(1622.7,75.0,);<br>QLTYNPDESSKPNM-Oxidation (M); Gln->pyro-Glu (N-term Q)(1622.7,76.0,);<br>QLTYNPDESSKPNM-Oxidation (M); Gln->pyro-Glu (N-term Q)(1622.7,77.0,);<br>QLTYNPDESSKPNM-Oxidation (M); Gln->pyro-Glu (N-term Q)(1622.7,79.0,)                                                                                                                                                                                                                                      | C1          |
| 1622.7 | 2 | 9  | FIBG_HUMAN                 |                                                                                                                                                                                                                                                                                                                                                                                                                                                                                                                                                                                                                                                                                                                                                                 | C1;N1       |
| 1631.8 | 2 | 2  | FIBB_HUMAN                 | EEAPSLRPAPPPISGGG-(1631.839,69.0,)                                                                                                                                                                                                                                                                                                                                                                                                                                                                                                                                                                                                                                                                                                                              | N1          |
| 1637.9 | 6 | 3  | APOA1_HUMAN                | LSALEEYTKKLNTQ-(1637.874,53.0,)<br>DVFLGMFLYEYAR-Oxidation (M)(1639.782,49.0,);<br>DVFLGMFLYEYAR-Oxidation (M)(1639.782,55.0,);<br>DVFLGMFLYEYAR-Oxidation (M)(1639.782,58.0,);<br>DVFLGMFLYEYAR-Oxidation (M)(1639.782,59.0,);<br>DVFLGMFLYEYAR-Oxidation (M)(1639.782,60.0,);<br>DVFLGMFLYEYAR-Oxidation (M)(1639.782,61.0,);<br>DVFLGMFLYEYAR-Oxidation (M)(1639.782,62.0,);<br>DVFLGMFLYEYAR-Oxidation (M)(1639.782,63.0,);<br>DVFLGMFLYEYAR-Oxidation (M)(1639.782,64.0,);<br>DVFLGMFLYEYAR-Oxidation (M)(1639.782,65.0,);<br>DVFLGMFLYEYAR-Oxidation (M)(1639.782,66.0,);<br>DVFLGMFLYEYAR-Oxidation (M)(1639.782,67.0,);<br>DVFLGMFLYEYAR-Oxidation (M)(1639.782,70.0,);<br>DVFLGMFLYEYAR-Oxidation (M)(1639.782,71.0,)                                  | N2          |
| 1639.8 | 1 | 15 | ALBU_HUMAN                 | KVPQVSTPTLVEVSR-(1639.938,47.0,);<br>KVPQVSTPTLVEVSR-(1639.938,48.0,);<br>KVPQVSTPTLVEVSR-(1639.938,56.0,);<br>KVPQVSTPTLVEVSR-(1639.938,56.0,);<br>KVPQVSTPTLVEVSR-(1639.938,58.0,);<br>KVPQVSTPTLVEVSR-(1639.938,59.0,);<br>KVPQVSTPTLVEVSR-(1639.938,60.0,);<br>KVPQVSTPTLVEVSR-(1639.938,62.0,);<br>KVPQVSTPTLVEVSR-(1639.938,63.0,);<br>KVPQVSTPTLVEVSR-(1639.938,64.0,);<br>KVPQVSTPTLVEVSR-(1639.938,65.0,);<br>KVPQVSTPTLVEVSR-(1639.938,66.0,);<br>KVPQVSTPTLVEVSR-(1639.938,67.0,);<br>KVPQVSTPTLVEVSR-(1639.938,68.0,);<br>KVPQVSTPTLVEVSR-(1639.938,71.0,);<br>KVPQVSTPTLVEVSR-(1639.938,72.0,);<br>KVPQVSTPTLVEVSR-(1639.938,79.0,);<br>KVPQVSTPTLVEVSR-(1639.938,80.0,);<br>KVPQVSTPTLVEVSR-(1639.938,89.0,);<br>KVPQVSTPTLVEVSR-(1639.938,90.0,) | C1;N1       |
| 1639.9 | 8 | 23 | ALBU_HUMAN                 | QNCSELFQLGEYK-Gln->pyro-Glu (N-term Q)(1640.726,59.0,);<br>QNCSELFQLGEYK-Gln->pyro-Glu (N-term Q)(1640.726,68.0,);<br>QNCSELFQLGEYK-Gln->pyro-Glu (N-term Q)(1640.726,73.0,);<br>QNCSELFQLGEYK-Gln->pyro-Glu (N-term Q)(1640.726,74.0,);<br>QNCSELFQLGEYK-Gln->pyro-Glu (N-term Q)(1640.726,82.0,);<br>QNCSELFQLGEYK-Gln->pyro-Glu (N-term Q)(1640.726,83.0,)                                                                                                                                                                                                                                                                                                                                                                                                   | C1;C2;N1;N2 |
| 1640.7 | 3 | 8  | ALBU_HUMAN                 | QNCSELFQLGEYK-(1657.753,54.0,);<br>QNCSELFQLGEYK-(1657.753,55.0,);<br>QNCSELFQLGEYK-(1657.753,58.0,);<br>QNCSELFQLGEYK-(1657.753,60.0,);<br>QNCSELFQLGEYK-(1657.753,61.0,);<br>QNCSELFQLGEYK-(1657.753,66.0,);                                                                                                                                                                                                                                                                                                                                                                                                                                                                                                                                                  | C1;N1       |
| 1657.8 | 0 | 12 | ALBU_HUMAN                 |                                                                                                                                                                                                                                                                                                                                                                                                                                                                                                                                                                                                                                                                                                                                                                 | C1;C2;N1    |

|        |    |    |                                        |                                                                                                                                                                                                                                                                                                                                                                                                                                                                                                                                                                                                                                                                                                                                                                                                                                                                                                          |             |
|--------|----|----|----------------------------------------|----------------------------------------------------------------------------------------------------------------------------------------------------------------------------------------------------------------------------------------------------------------------------------------------------------------------------------------------------------------------------------------------------------------------------------------------------------------------------------------------------------------------------------------------------------------------------------------------------------------------------------------------------------------------------------------------------------------------------------------------------------------------------------------------------------------------------------------------------------------------------------------------------------|-------------|
| 1659.9 | 0  | 7  | K1C17_HUMAN                            | QNCSELFQGEYK-(1657.753,67.0,);<br>QNCSELFQGEYK-(1657.753,70.0,);<br>QNCSELFQGEYK-(1657.753,72.0,);<br>QNCSELFQGEYK-(1657.753,75.0,);<br>QNCSELFQGEYK-(1657.753,76.0,);<br>TIVEEVQDGKVISSR-(1659.891,60.0,);<br>TIVEEVQDGKVISSR-(1659.891,61.0,);<br>TIVEEVQDGKVISSR-(1659.891,68.0,);<br>TIVEEVQDGKVISSR-(1659.891,69.0,);<br>TIVEEVQDGKVISSR-(1659.891,78.0,);<br>TIVEEVQDGKVISSR-(1659.891,80.0,);<br>SAGSWNSGSSGPGSTGNR-(1665.721,58.0,);<br>SAGSWNSGSSGPGSTGNR-(1665.721,59.0,);<br>SAGSWNSGSSGPGSTGNR-(1665.721,64.0,);<br>SAGSWNSGSSGPGSTGNR-(1665.721,67.0,);<br>SAGSWNSGSSGPGSTGNR-(1665.721,68.0,);<br>SAGSWNSGSSGPGSTGNR-(1665.721,69.0,);<br>SAGSWNSGSSGPGSTGNR-(1665.721,72.0,);<br>SAGSWNSGSSGPGSTGNR-(1665.721,73.0,);<br>SAGSWNSGSSGPGSTGNR-Deamidated (NQ)(1666.705,51.0,);<br>SAGSWNSGSSGPGSTGNR-Deamidated (NQ)(1666.705,68.0,);<br>SAGSWNSGSSGPGSTGNR-Deamidated (NQ)(1666.705,69.0,) | C1          |
| 1665.7 | 2  | 9  | FIBA_HUMAN                             | AIQLTYNPDESSKPN-(1676.813,52.0,);<br>AIQLTYNPDESSKPN-(1676.813,54.0,);<br>AIQLTYNPDESSKPN-(1676.813,55.0,);<br>AIQLTYNPDESSKPN-(1676.813,61.0,);<br>AIQLTYNPDESSKPN-(1676.813,62.0,);<br>AIQLTYNPDESSKPN-(1676.813,64.0,);<br>AIQLTYNPDESSKPN-(1676.813,66.0,);<br>VGAHAGEYGAEALERM-Oxidation (M)(1676.77,57.0,)                                                                                                                                                                                                                                                                                                                                                                                                                                                                                                                                                                                         | C1          |
| 1666.7 | 1  | 4  | FIBA_HUMAN<br>FIBG_HUMAN,<br>HBA_HUMAN | VPEQPLYPQYQPQ-(1683.838,62.0,)                                                                                                                                                                                                                                                                                                                                                                                                                                                                                                                                                                                                                                                                                                                                                                                                                                                                           | C1          |
| 1676.8 | 9  | 10 | STAT_HUMAN                             | GPGFVPPPPPPYGPGR-(1685.88,52.0,);<br>QQPPPPPPPPRQPG-2 Deamidated (NQ)(1685.865,49.0,)                                                                                                                                                                                                                                                                                                                                                                                                                                                                                                                                                                                                                                                                                                                                                                                                                    | C1;N2       |
| 1683.8 | 4  | 3  | SMR3B_HUMAN                            | SDLQAQSKGNPEQTPV-(1698.829,55.0,)<br>SETESRGSSESGIFTNT-(1701.756,51.0,);<br>SETESRGSSESGIFTNT-(1701.756,53.0,)                                                                                                                                                                                                                                                                                                                                                                                                                                                                                                                                                                                                                                                                                                                                                                                           | N2          |
| 1685.9 | 14 | 5  | SN1L2_HUMAN                            | GPYQPVPPEQPLYPQP-(1709.853,58.0,);<br>GPYQPVPPEQPLYPQP-(1709.853,59.0,)                                                                                                                                                                                                                                                                                                                                                                                                                                                                                                                                                                                                                                                                                                                                                                                                                                  | C1;N2       |
| 1698.8 | 6  | 3  | VTNC_HUMAN                             | VVSLGSPSGEVSHPRKT-(1736.929,52.0,)<br>IQLTYNPDESSKPNM-Oxidation (M)(1752.811,51.0,)                                                                                                                                                                                                                                                                                                                                                                                                                                                                                                                                                                                                                                                                                                                                                                                                                      | C2;N1;N2    |
| 1701.8 | 4  | 4  | FIBA_HUMAN                             | SSAGSWNSGSSGPGSTGNR-Deamidated (NQ)(1753.737,47.0,)<br>YGPYQPVPPEQPLYPQP-(1775.864,53.0,)                                                                                                                                                                                                                                                                                                                                                                                                                                                                                                                                                                                                                                                                                                                                                                                                                | C1;N1;N2    |
| 1709.9 | 20 | 4  | STAT_HUMAN                             | EEAPSLRPAPPPISGGGY-(1794.902,53.0,);<br>EEAPSLRPAPPPISGGGY-(1794.902,59.0,);<br>EEAPSLRPAPPPISGGGY-(1794.902,63.0,)                                                                                                                                                                                                                                                                                                                                                                                                                                                                                                                                                                                                                                                                                                                                                                                      | C1;N2       |
| 1736.9 | 0  | 2  | FETUA_HUMAN                            | NPSSAGSWNSGSSGPGSTGN-(1807.748,48.0,);<br>NPSSAGSWNSGSSGPGSTGN-(1807.748,58.0,);<br>NPSSAGSWNSGSSGPGSTGN-(1807.748,60.0,);<br>NPSSAGSWNSGSSGPGSTGN-(1807.748,63.0,);<br>NPSSAGSWNSGSSGPGSTGN-(1807.748,77.0,);<br>NPSSAGSWNSGSSGPGSTGN-(1807.748,87.0,);<br>NPSSAGSWNSGSSGPGSTGN-(1807.748,90.0,)                                                                                                                                                                                                                                                                                                                                                                                                                                                                                                                                                                                                        | N2          |
| 1752.8 | 0  | 2  | FIBG_HUMAN                             | NPSSAGSWNSGSSGPGSTGN-(1807.748,48.0,);<br>NPSSAGSWNSGSSGPGSTGN-(1807.748,58.0,);<br>NPSSAGSWNSGSSGPGSTGN-(1807.748,60.0,);<br>NPSSAGSWNSGSSGPGSTGN-(1807.748,63.0,);<br>NPSSAGSWNSGSSGPGSTGN-(1807.748,77.0,);<br>NPSSAGSWNSGSSGPGSTGN-(1807.748,87.0,);<br>NPSSAGSWNSGSSGPGSTGN-(1807.748,90.0,)                                                                                                                                                                                                                                                                                                                                                                                                                                                                                                                                                                                                        | N1          |
| 1753.7 | 1  | 2  | FIBA_HUMAN                             | NPSSAGSWNSGSSGPGSTGN-(1807.748,48.0,);<br>NPSSAGSWNSGSSGPGSTGN-(1807.748,58.0,);<br>NPSSAGSWNSGSSGPGSTGN-(1807.748,60.0,);<br>NPSSAGSWNSGSSGPGSTGN-(1807.748,63.0,);<br>NPSSAGSWNSGSSGPGSTGN-(1807.748,77.0,);<br>NPSSAGSWNSGSSGPGSTGN-(1807.748,87.0,);<br>NPSSAGSWNSGSSGPGSTGN-(1807.748,90.0,)                                                                                                                                                                                                                                                                                                                                                                                                                                                                                                                                                                                                        | C1          |
| 1775.9 | 2  | 2  | STAT_HUMAN                             | NPSSAGSWNSGSSGPGSTGN-(1807.748,48.0,);<br>NPSSAGSWNSGSSGPGSTGN-(1807.748,58.0,);<br>NPSSAGSWNSGSSGPGSTGN-(1807.748,60.0,);<br>NPSSAGSWNSGSSGPGSTGN-(1807.748,63.0,);<br>NPSSAGSWNSGSSGPGSTGN-(1807.748,77.0,);<br>NPSSAGSWNSGSSGPGSTGN-(1807.748,87.0,);<br>NPSSAGSWNSGSSGPGSTGN-(1807.748,90.0,)                                                                                                                                                                                                                                                                                                                                                                                                                                                                                                                                                                                                        | N2          |
| 1794.9 | 2  | 4  | FIBB_HUMAN                             | NPSSAGSWNSGSSGPGSTGN-(1807.748,48.0,);<br>NPSSAGSWNSGSSGPGSTGN-(1807.748,58.0,);<br>NPSSAGSWNSGSSGPGSTGN-(1807.748,60.0,);<br>NPSSAGSWNSGSSGPGSTGN-(1807.748,63.0,);<br>NPSSAGSWNSGSSGPGSTGN-(1807.748,77.0,);<br>NPSSAGSWNSGSSGPGSTGN-(1807.748,87.0,);<br>NPSSAGSWNSGSSGPGSTGN-(1807.748,90.0,)                                                                                                                                                                                                                                                                                                                                                                                                                                                                                                                                                                                                        | C1;N1       |
| 1802.8 | 0  | 6  | FIBA_HUMAN                             | NPSSAGSWNSGSSGPGSTGN-(1807.748,48.0,);<br>NPSSAGSWNSGSSGPGSTGN-(1807.748,58.0,);<br>NPSSAGSWNSGSSGPGSTGN-(1807.748,60.0,);<br>NPSSAGSWNSGSSGPGSTGN-(1807.748,63.0,);<br>NPSSAGSWNSGSSGPGSTGN-(1807.748,77.0,);<br>NPSSAGSWNSGSSGPGSTGN-(1807.748,87.0,);<br>NPSSAGSWNSGSSGPGSTGN-(1807.748,90.0,)                                                                                                                                                                                                                                                                                                                                                                                                                                                                                                                                                                                                        | C1          |
| 1807.7 | 0  | 8  | FIBA_HUMAN                             | AIQLTYNPDESSKPNM-Oxidation (M)(1823.848,46.0,);<br>AIQLTYNPDESSKPNM-Oxidation (M)(1823.848,51.0,);<br>AIQLTYNPDESSKPNM-Oxidation (M)(1823.848,55.0,);<br>AIQLTYNPDESSKPNM-Oxidation (M)(1823.848,60.0,);<br>AIQLTYNPDESSKPNM-Oxidation (M)(1823.848,61.0,);<br>AIQLTYNPDESSKPNM-Oxidation (M)(1823.848,62.0,);<br>AIQLTYNPDESSKPNM-Oxidation (M)(1823.848,63.0,);<br>AIQLTYNPDESSKPNM-Oxidation (M)(1823.848,65.0,);<br>AIQLTYNPDESSKPNM-Oxidation (M)(1823.848,66.0,);<br>AIQLTYNPDESSKPNM-Oxidation (M)(1823.848,67.0,);<br>AIQLTYNPDESSKPNM-Oxidation (M)(1823.848,68.0,);<br>AIQLTYNPDESSKPNM-Oxidation (M)(1823.848,70.0,);<br>AIQLTYNPDESSKPNM-Oxidation (M)(1823.848,71.0,);<br>AIQLTYNPDESSKPNM-Oxidation (M)(1823.848,74.0,);<br>AIQLTYNPDESSKPNM-Oxidation (M)(1823.848,75.0,);                                                                                                                | C1          |
| 1823.8 | 0  | 17 | FIBG_HUMAN                             | AIQLTYNPDESSKPNM-Oxidation (M)(1823.848,46.0,);<br>AIQLTYNPDESSKPNM-Oxidation (M)(1823.848,51.0,);<br>AIQLTYNPDESSKPNM-Oxidation (M)(1823.848,55.0,);<br>AIQLTYNPDESSKPNM-Oxidation (M)(1823.848,60.0,);<br>AIQLTYNPDESSKPNM-Oxidation (M)(1823.848,61.0,);<br>AIQLTYNPDESSKPNM-Oxidation (M)(1823.848,62.0,);<br>AIQLTYNPDESSKPNM-Oxidation (M)(1823.848,63.0,);<br>AIQLTYNPDESSKPNM-Oxidation (M)(1823.848,65.0,);<br>AIQLTYNPDESSKPNM-Oxidation (M)(1823.848,66.0,);<br>AIQLTYNPDESSKPNM-Oxidation (M)(1823.848,67.0,);<br>AIQLTYNPDESSKPNM-Oxidation (M)(1823.848,68.0,);<br>AIQLTYNPDESSKPNM-Oxidation (M)(1823.848,70.0,);<br>AIQLTYNPDESSKPNM-Oxidation (M)(1823.848,71.0,);<br>AIQLTYNPDESSKPNM-Oxidation (M)(1823.848,74.0,);<br>AIQLTYNPDESSKPNM-Oxidation (M)(1823.848,75.0,);                                                                                                                | C1;C2;N1;N2 |

|        |    |    |                                                     |                                                                                                                                                                                                                                                                                                                                                                                                                                                                                                           |          |
|--------|----|----|-----------------------------------------------------|-----------------------------------------------------------------------------------------------------------------------------------------------------------------------------------------------------------------------------------------------------------------------------------------------------------------------------------------------------------------------------------------------------------------------------------------------------------------------------------------------------------|----------|
| 1829.9 | 3  | 8  | FIBA_HUMAN                                          | AIQLTYNPDESSKPNM-Oxidation (M)(1823.848,76.0),<br>SETESRGSESGIFTNTK-(1829.851,53.0,);<br>SETESRGSESGIFTNTK-(1829.851,56.0,);<br>SETESRGSESGIFTNTK-(1829.851,58.0,);<br>SETESRGSESGIFTNTK-(1829.851,60.0,);<br>SETESRGSESGIFTNTK-(1829.851,67.0,)                                                                                                                                                                                                                                                          | C1;N2    |
| 1830.8 | 19 | 8  | FIBA_HUMAN                                          | SSSYSKQFTSSTSYNR-Deamidated (NQ)(1830.814,50.0,);<br>SSSYSKQFTSSTSYNR-Deamidated (NQ)(1830.814,51.0,);<br>SSSYSKQFTSSTSYNR-Deamidated (NQ)(1830.814,54.0,);<br>SSSYSKQFTSSTSYNR-Deamidated (NQ)(1830.814,56.0,)                                                                                                                                                                                                                                                                                           | C1;C2    |
| 1832.9 | 1  | 2  | STAT_HUMAN                                          | GYGPYQVPVEQPLYPQ-(1832.885,55.0,)                                                                                                                                                                                                                                                                                                                                                                                                                                                                         | N2       |
| 1833.9 | 0  | 1  | A1AT_HUMAN                                          | VFSNGADLSGVTEEAPLK-(1833.923,60.0,)                                                                                                                                                                                                                                                                                                                                                                                                                                                                       | N1       |
| 1834.9 | 0  | 7  | A1AT_HUMAN                                          | VFSNGADLSGVTEEAPLK-Deamidated (NQ)(1834.907,49.0,);<br>VFSNGADLSGVTEEAPLK-Deamidated (NQ)(1834.907,68.0,);<br>VFSNGADLSGVTEEAPLK-Deamidated (NQ)(1834.907,78.0,);<br>VFSNGADLSGVTEEAPLK-Deamidated (NQ)(1834.907,79.0,);<br>VFSNGADLSGVTEEAPLK-Deamidated (NQ)(1834.907,85.0,);<br>VFSNGADLSGVTEEAPLK-Deamidated (NQ)(1834.907,93.0,)                                                                                                                                                                     | N1       |
| 1838.9 | 2  | 7  | ACTB_HUMAN,<br>ACTG_HUMAN                           | SSSSLEKSYELPDGQVI-(1838.902,53.0,);<br>SSSSLEKSYELPDGQVI-(1838.902,54.0,);<br>SSSSLEKSYELPDGQVI-(1838.902,54.0,);<br>SSSSLEKSYELPDGQVI-(1838.902,57.0,);<br>SSSSLEKSYELPDGQVI-(1838.902,58.0,)                                                                                                                                                                                                                                                                                                            | C1;N2    |
| 1855.9 | 0  | 3  | CO3_HUMAN                                           | SEETKENEGFTVTAEGK-(1855.856,54.0,);<br>SEETKENEGFTVTAEGK-(1855.856,58.0,)                                                                                                                                                                                                                                                                                                                                                                                                                                 | C1       |
| 1859.9 | 0  | 10 | FIBA_HUMAN                                          | NPGSSGTGGTATWKPGSSGPG-(1859.852,100.0,);<br>NPGSSGTGGTATWKPGSSGPG-(1859.852,102.0,);<br>NPGSSGTGGTATWKPGSSGPG-(1859.852,111.0,);<br>NPGSSGTGGTATWKPGSSGPG-(1859.852,112.0,);<br>NPGSSGTGGTATWKPGSSGPG-(1859.852,117.0,);<br>NPGSSGTGGTATWKPGSSGPG-(1859.852,124.0,);<br>NPGSSGTGGTATWKPGSSGPG-(1859.852,74.0,);<br>NPGSSGTGGTATWKPGSSGPG-(1859.852,85.0,);<br>NPGSSGTGGTATWKPGSSGPG-(1859.852,95.0,)                                                                                                      | C1       |
| 1870.8 | 1  | 13 | FIBA_HUMAN                                          | GGSTSYGTGSETESPRNPS-(1870.805,102.0,);<br>GGSTSYGTGSETESPRNPS-(1870.805,105.0,);<br>GGSTSYGTGSETESPRNPS-(1870.805,46.0,);<br>GGSTSYGTGSETESPRNPS-(1870.805,61.0,);<br>GGSTSYGTGSETESPRNPS-(1870.805,63.0,);<br>GGSTSYGTGSETESPRNPS-(1870.805,68.0,);<br>GGSTSYGTGSETESPRNPS-(1870.805,69.0,);<br>GGSTSYGTGSETESPRNPS-(1870.805,72.0,);<br>GGSTSYGTGSETESPRNPS-(1870.805,75.0,);<br>GGSTSYGTGSETESPRNPS-(1870.805,80.0,);<br>GGSTSYGTGSETESPRNPS-(1870.805,81.0,);<br>GGSTSYGTGSETESPRNPS-(1870.805,87.0,) | C1       |
| 1872.9 | 10 | 8  | STAT_HUMAN                                          | YGPYQVPVEQPLYPQ-(1872.917,55.0,);<br>YGPYQVPVEQPLYPQ-(1872.917,55.0,);<br>YGPYQVPVEQPLYPQ-(1872.917,67.0,)                                                                                                                                                                                                                                                                                                                                                                                                | C2;N2    |
| 1877.0 | 2  | 3  | FIBA_HUMAN                                          | EYHTEKLVTSKGDKEL-(1876.965,52.0,)                                                                                                                                                                                                                                                                                                                                                                                                                                                                         | C1       |
| 1886.9 | 3  | 5  | FIBA_HUMAN                                          | HRHPDEAAFFDTASTGK-(1886.878,67.0,);<br>HRHPDEAAFFDTASTGK-(1886.878,70.0,)                                                                                                                                                                                                                                                                                                                                                                                                                                 | C1;N1;N2 |
| 1908.0 | 1  | 3  | AACT_HUMAN                                          | AVLDVFEEGTEASAATAVK-(1907.96,67.0,);<br>AVLDVFEEGTEASAATAVK-(1907.96,75.0,)                                                                                                                                                                                                                                                                                                                                                                                                                               | N1       |
| 1910.9 | 0  | 3  | ALBU_HUMAN                                          | RPCFSALEVDETYVPK-(1910.932,52.0,)                                                                                                                                                                                                                                                                                                                                                                                                                                                                         | C1;C2;N1 |
| 1911.9 | 1  | 6  | STAT_HUMAN                                          | GRFGYGYGPYQVPVEQP-(1911.902,52.0,);<br>GRFGYGYGPYQVPVEQP-(1911.902,54.0,);<br>GRFGYGYGPYQVPVEQP-(1911.902,54.0,);<br>GRFGYGYGPYQVPVEQP-(1911.902,59.0,);<br>GRFGYGYGPYQVPVEQP-(1911.902,61.0,)                                                                                                                                                                                                                                                                                                            | N2       |
| 1916.0 | 5  | 3  | FIBB_HUMAN                                          | KREEAPSLRPAPPISGGG-(1916.035,50.0,)                                                                                                                                                                                                                                                                                                                                                                                                                                                                       | C1;N1;N2 |
| 1925.0 | 0  | 13 | H12_HUMAN,<br>H13_HUMAN,<br>H14_HUMAN,<br>H15_HUMAN | SLVSKGTLVQTKGTGASGSF-(1925.034,101.0,);<br>SLVSKGTLVQTKGTGASGSF-(1925.034,44.0,);<br>SLVSKGTLVQTKGTGASGSF-(1925.034,50.0,);<br>SLVSKGTLVQTKGTGASGSF-(1925.034,61.0,);<br>SLVSKGTLVQTKGTGASGSF-(1925.034,66.0,);<br>SLVSKGTLVQTKGTGASGSF-(1925.034,68.0,);<br>SLVSKGTLVQTKGTGASGSF-(1925.034,75.0,);<br>SLVSKGTLVQTKGTGASGSF-(1925.034,76.0,);<br>SLVSKGTLVQTKGTGASGSF-(1925.034,77.0,);<br>SLVSKGTLVQTKGTGASGSF-(1925.034,79.0,);<br>SLVSKGTLVQTKGTGASGSF-(1925.034,84.0,)                                | C1;N2    |
| 1929.9 | 3  | 7  | STAT_HUMAN                                          | GYGPYQVPVEQPLYPQ-(1929.938,54.0,);                                                                                                                                                                                                                                                                                                                                                                                                                                                                        | C2;N2    |

|        |    |    |             |                                                                                                                                                                                                                                                                                                                                                                                                                                                                                                                                                                                                                                                                    |          |
|--------|----|----|-------------|--------------------------------------------------------------------------------------------------------------------------------------------------------------------------------------------------------------------------------------------------------------------------------------------------------------------------------------------------------------------------------------------------------------------------------------------------------------------------------------------------------------------------------------------------------------------------------------------------------------------------------------------------------------------|----------|
| 1932.0 | 9  | 11 | ALBU_HUMAN  | GYGPYQPVPEQPLYQP-(1929.938,58.0,);<br>GYGPYQPVPEQPLYQP-(1929.938,59.0,);<br>GYGPYQPVPEQPLYQP-(1929.938,69.0,);<br>SLHTLFGDKLCTVATLR-(1932.037,51.0,);<br>SLHTLFGDKLCTVATLR-(1932.037,60.0,);<br>SLHTLFGDKLCTVATLR-(1932.037,64.0,)                                                                                                                                                                                                                                                                                                                                                                                                                                 | C1;N1;N2 |
| 1936.9 | 0  | 4  | FIBG_HUMAN  | AIQLTYNPDESSKPNMI-Oxidation (M)(1936.932,54.0,);<br>AIQLTYNPDESSKPNMI-Oxidation (M)(1936.932,62.0,);<br>AIQLTYNPDESSKPNMI-Oxidation (M)(1936.932,64.0,)                                                                                                                                                                                                                                                                                                                                                                                                                                                                                                            | C1;N2    |
| 1956.0 | 3  | 5  | SMR3B_HUMAN | APPQPFPGPGFVPPPPPPY-(1956.005,52.0,);<br>APPQPFPGPGFVPPPPPPY-(1956.005,56.0,);<br>APPQPFPGPGFVPPPPPPY-(1956.005,59.0,)                                                                                                                                                                                                                                                                                                                                                                                                                                                                                                                                             | N2       |
| 1963.8 | 0  | 17 | FIBA_HUMAN  | NPSSAGSWNSGSSGPGSTGNR-(1963.849,111.0,);<br>NPSSAGSWNSGSSGPGSTGNR-(1963.849,112.0,);<br>NPSSAGSWNSGSSGPGSTGNR-(1963.849,46.0,);<br>NPSSAGSWNSGSSGPGSTGNR-(1963.849,52.0,);<br>NPSSAGSWNSGSSGPGSTGNR-(1963.849,62.0,);<br>NPSSAGSWNSGSSGPGSTGNR-(1963.849,65.0,);<br>NPSSAGSWNSGSSGPGSTGNR-(1963.849,66.0,);<br>NPSSAGSWNSGSSGPGSTGNR-(1963.849,67.0,);<br>NPSSAGSWNSGSSGPGSTGNR-(1963.849,68.0,);<br>NPSSAGSWNSGSSGPGSTGNR-(1963.849,70.0,);<br>NPSSAGSWNSGSSGPGSTGNR-(1963.849,86.0,);<br>NPSSAGSWNSGSSGPGSTGNR-(1963.849,87.0,);<br>NPSSAGSWNSGSSGPGSTGNR-(1963.849,89.0,);<br>NPSSAGSWNSGSSGPGSTGNR-(1963.849,90.0,);<br>NPSSAGSWNSGSSGPGSTGNR-(1963.849,97.0,) | C1       |
| 1964.8 | 9  | 8  | FIBA_HUMAN  | NPSSAGSWNSGSSGPGSTGNR-Deamidated (NQ)(1964.833,103.0,);<br>NPSSAGSWNSGSSGPGSTGNR-Deamidated (NQ)(1964.833,50.0,);<br>NPSSAGSWNSGSSGPGSTGNR-Deamidated (NQ)(1964.833,77.0,);<br>NPSSAGSWNSGSSGPGSTGNR-Deamidated (NQ)(1964.833,85.0,);<br>NPSSAGSWNSGSSGPGSTGNR-Deamidated (NQ)(1964.833,97.0,)                                                                                                                                                                                                                                                                                                                                                                     | C1;N2    |
| 1982.1 | 1  | 3  | MYG_HUMAN   | KGHHEAEIKPLAQSHATK-(1982.057,79.0,);<br>KGHHEAEIKPLAQSHATK-(1982.057,80.0,)                                                                                                                                                                                                                                                                                                                                                                                                                                                                                                                                                                                        | C2       |
| 1992.9 | 13 | 6  | FIBG_HUMAN  | QLTYNPDESSKPNMIDAA-Oxidation (M); Gln->pyro-Glu (N-term Q)(1992.885,59.0,);<br>QLTYNPDESSKPNMIDAA-Oxidation (M); Gln->pyro-Glu (N-term Q)(1992.885,60.0,);<br>QLTYNPDESSKPNMIDAA-Oxidation (M); Gln->pyro-Glu (N-term Q)(1992.885,65.0,);<br>QLTYNPDESSKPNMIDAA-Oxidation (M); Gln->pyro-Glu (N-term Q)(1992.885,72.0,)                                                                                                                                                                                                                                                                                                                                            | C1;N1    |
